# Supplementary material
Source: publisher figshare collection journal article supplement (https://gsajournals.figshare.com/ndownloader/files/13164575)
Supplement: Supplementary file 1 [file 13164575]

## Sheet: Information
Dataset 2
Clustering analysis of mean centered data for 1,923 genes found to be significantly differentially expressed (FDR < 0.01) in YPD anaerobic conditions.
Columns:
Gene ID
Gene Name
Mean Center Data for YPD transcriptional expression	YPD
	ANA = Anaerobic
	Strain (WA = West African, PAP = Papaya, IL = IL01)
Rep	Replicate 1 or 2

## Sheet: Dataset2
Gene	Gene Name	YPD_ANA_WA_R1	YPD_ANA_WA_R2	YPD_ANA_PAP_R1	YPD_ANA_PAP_R2	YPD_ANA_IL_R1	YPD_ANA_IL_R2
Cluster_1	Cluster_1	0	0	0	0	0	0
Q0140	VAR1	-2.26993	1.09081	2.79512	-0.098126	1.09081	-2.60869
Q0055	AI2	-2.43492	-2.43492	5.16731	4.57237	-2.43492	-2.43492
YBL108C-A	PAU9	-3.95272	-3.95272	8.09459	8.20182	-3.95272	-4.43824
YBR301W	PAU24	-7.05657	-6.41721	3.86895	3.74763	3.11745	2.73974
Q0160	SCEI	-1.18843	-1.18843	3.79704	3.89856	-1.18843	-4.13033
YBL100W-B	YBL100W-B	-4.3202	-4.02894	7.55102	6.43636	-0.394315	-5.24392
YGR294W	PAU12	-6.48815	-4.29	4.39197	4.17485	1.1016	1.10973
Q0110	BI2	-3.79159	-0.343169	2.91732	1.90378	-0.343169	-0.343169
YLR410W-B	YLR410W-B	-1.50111	-1.50111	3.73258	2.27185	-1.50111	-1.50111
YNL284C-B	YNL284C-B	-5.39563	0.102945	3.16767	1.91913	0.102945	0.102945
YCR104W	PAU3	-5.66128	-6.09701	2.98564	3.01934	3.03434	2.71897
YIL057C	RGI2	-3.6185	-2.74228	1.98261	2.21627	1.21225	0.949637
YGL261C	PAU11	-4.73114	-4.73114	2.95946	3.07587	2.22333	1.20363
Cluster_2	Cluster_2	0	0	0	0	0	0
YPL249C	GYP5	0.052722	-0.632712	1.04154	0.129014	-0.227313	-0.363255
YDR263C	DIN7	-0.298276	-0.159021	1.61477	0.799529	-1.16797	-0.789036
YDL220C	CDC13	0.140574	-0.152465	0.526061	-0.164908	-0.233836	-0.115425
YGL252C	RTG2	-0.234836	-0.28505	0.458075	0.139739	-0.182044	0.104116
YLR126C	YLR126C	-0.069533	-0.044668	0.639642	0.13544	-0.411291	-0.249592
YOR346W	REV1	0.36352	-0.13877	1.05006	0.022513	-1.20661	-0.090714
YJL102W	MEF2	0.233404	-0.195667	0.566438	-0.093165	-0.329307	-0.181703
YDR034C-D	YDR034C-D	-0.305346	-0.305346	1.16533	0.056051	-0.305346	-0.305346
YBR145W	ADH5	-0.222584	-0.367022	0.311192	0.919285	0.019517	-0.660388
YNL124W	NAF1	-0.273824	-0.152799	0.614865	-0.018824	-0.094933	-0.074485
YJL054W	TIM54	-0.073918	-0.028035	0.566111	-0.186627	-0.260215	-0.017315
YOL156W	HXT11	-1.33617	0.53408	0.53408	0.53408	0.601498	-0.86757
YNL136W	EAF7	0.139126	-0.984653	1.4183	0.076466	0.117433	-0.766672
YPL055C	LGE1	-0.317592	-0.31584	0.854842	-0.081656	0.081208	-0.220962
YOL032W	OPI10	-0.030008	-0.434807	0.500266	0.120361	0.150488	-0.306301
YGL163C	RAD54	-0.212357	-0.223926	0.760715	0.074926	-0.203725	-0.195633
YPL240C	HSP82	-0.147712	-0.62359	1.17748	0.467571	-0.306541	-0.567206
YOR119C	RIO1	0.012945	-0.341132	0.720147	-0.141125	-0.279688	0.028853
YMR305C	SCW10	-0.147825	0.094078	0.500222	-0.118179	-0.242665	-0.08563
YDR170W-A	YDR170W-A	-0.187842	-0.187842	1.05015	-0.298779	-0.187842	-0.187842
YKL198C	PTK1	-0.145456	-0.211132	0.547393	-0.015988	0.061816	-0.236632
YMR303C	ADH2	-0.429327	-0.356247	1.58084	0.95633	-0.55465	-1.19694
YMR321C	YMR321C	-0.343374	-0.242593	0.754705	0.149347	-0.153562	-0.164524
YBR065C	ECM2	-1.08682	-1.41309	2.21089	0.968791	-0.337602	-0.342163
YDL156W	CMR1	-0.521689	-0.18909	0.714031	0.04828	-0.131143	0.079611
YPR145C-A	YPR145C-A	-0.278831	0.118774	0.399127	0.144332	-0.185396	-0.198006
YJL219W	HXT9	-1.27587	0.600352	0.467253	0.813474	1.00942	-1.61463
YER016W	BIM1	-0.08023	-0.45283	0.662892	0.048074	-0.19874	0.020834
YFL053W	DAK2	-0.426983	-0.550762	1.18104	1.18104	-0.296672	-1.08767
YDR312W	SSF2	-0.059535	-0.292249	0.82109	-0.195158	-0.28432	0.010172
YOR048C	RAT1	0.021874	-0.326848	0.636161	-0.198399	-0.136686	0.003898
YNR054C	ESF2	-0.253575	-0.542413	1.15661	-0.081769	-0.245255	-0.0336
YDR158W	HOM2	-0.276739	-0.15997	0.47532	0.464138	-0.297502	-0.205247
YDR241W	BUD26	-0.944798	-0.194108	1.73692	0.915063	-0.814488	-0.698593
YNL061W	NOP2	0.082198	-0.339486	0.660098	-0.093268	-0.266116	-0.043425
YBR115C	LYS2	0.03826	-0.201405	0.574662	-0.054089	-0.271902	-0.085527
YML062C	MFT1	-0.069113	-0.723407	1.0716	0.325085	-0.35384	-0.250328
YLR399C	BDF1	0.038351	-0.234506	0.678227	-0.262372	-0.186166	-0.033534
YFR001W	LOC1	0.197913	-0.594023	1.10542	-0.26587	-0.225977	-0.217465
YKR093W	PTR2	-1.49573	-0.755454	1.32465	0.769295	-0.04626	0.2035
YDR508C	GNP1	-0.109958	-0.175262	0.462932	-0.012423	-0.079623	-0.085666
YLR121C	YPS3	-0.17608	-0.108995	0.622895	-0.126358	0.05945	-0.270912
YOR287C	RRP36	-0.056523	-0.605608	1.08621	0.125479	-0.123249	-0.426306
YOL159C-A	YOL159C-A	-0.850366	-0.850366	1.57135	1.83011	-0.850366	-0.850366
YNR073C	YNR073C	-0.505606	-1.15295	1.44188	0.932714	-0.255001	-0.461034
YKL082C	RRP14	0.171303	-1.89108	1.91964	0.336123	-0.347479	-0.188515
YGL259W	YPS5	-1.13725	-0.9391	1.0653	0.909026	-0.421976	0.523994
YEL010W	YEL010W	-2.05523	-0.464365	2.33175	1.11658	-0.464365	-0.464365
YHR156C	LIN1	-0.287158	-0.467521	0.945349	-0.008437	-0.213431	0.031197
YER138W-A	YER138W-A	-0.712376	-0.712376	1.50289	1.34661	-0.712376	-0.712376
YOR128C	ADE2	-0.177772	-0.329281	0.329839	0.207397	-0.0092	-0.020983
YKL047W	ANR2	-0.251936	-0.240555	0.37383	0.123742	0.031022	-0.036104
YIL117C	PRM5	-1.42382	-1.3252	2.24214	1.82599	-0.55654	-0.762573
YNL064C	YDJ1	-0.035441	-0.185999	0.539	-0.100099	-0.128629	-0.088832
YDL087C	LUC7	-0.198441	-0.055434	0.487196	0.307265	-0.395705	-0.144881
YIL155C	GUT2	-0.163022	-0.193692	0.892378	0.203431	-0.480171	-0.258923
YBR297W	MAL33	-0.258684	-0.967426	1.32094	1.0233	-0.128374	-0.989759
YNL161W	CBK1	0.06852	-0.181028	0.684445	-0.224133	-0.185979	-0.161826
YGR280C	PXR1	-0.280667	-0.96084	1.47681	0.362759	-0.794213	0.196151
YCR102C	YCR102C	-0.468093	-0.253922	0.332458	1.2976	-0.68371	-0.224331
YGR061C	ADE6	-0.000967	-0.16603	0.52561	0.004396	-0.335791	-0.027218
YIL119C	RPI1	-0.387791	-0.62478	1.29984	0.631003	-0.370691	-0.547578
YEL061C	CIN8	-0.047415	-0.317786	1.01065	-0.359642	-0.094891	-0.190915
YIL065C	FIS1	-0.103114	0.117441	0.364373	0.185133	-0.342561	-0.221272
YGR271C-A	EFG1	0.00453	-0.436106	1.31215	-0.291587	-0.314467	-0.274521
YJR027W	YJR027W	0.063142	-0.091664	0.00713	0.00713	0.00713	0.00713
YNL088W	TOP2	-0.101492	-0.361525	1.05229	0.089357	-0.419095	-0.25953
YHR081W	LRP1	0.093147	-0.561147	0.794041	0.337102	-0.389519	-0.273624
YGR275W	RTT102	-0.264374	0.036733	0.601807	0.230677	-0.441245	-0.163598
YOL055C	THI20	-0.19704	-0.042417	0.480898	0.073657	-0.181242	-0.133856
YGL162W	SUT1	-0.424558	-0.262033	0.985598	0.460085	-0.198941	-0.560152
YLR045C	STU2	-0.083611	-0.234976	0.645785	-0.037336	-0.158491	-0.131371
YOR241W	MET7	-0.025122	-0.170185	0.48779	-0.003755	-0.233436	-0.055292
YER060W-A	FCY22	-1.20034	-0.876665	1.10571	0.785048	0.377425	-0.191178
YJR112W	NNF1	0.132146	-0.283813	1.0769	0.11588	-0.60004	-0.441076
YPL105C	SYH1	-0.023019	-0.20004	0.693728	-0.171835	-0.203572	-0.095261
YGR103W	NOP7	-0.04869	-0.23941	0.666917	-0.195485	-0.200436	0.017105
YKL088W	CAB3	0.11798	-0.542827	0.640334	0.057613	-0.260723	-0.012377
YJL088W	ARG3	0.30553	-0.286975	1.15803	0.839539	-0.859167	-1.15696
YNL128W	TEP1	0.209512	-1.06627	1.05697	0.60371	-0.522674	-0.281248
YDR356W	SPC110	0.071199	-0.626816	1.16609	-0.038813	-0.289671	-0.281985
YDR527W	RBA50	0.127122	-0.232035	1.03153	-0.203142	-0.609301	-0.114169
YOR168W	GLN4	-0.013559	-0.240371	0.578572	-0.038865	-0.162114	-0.123663
YAL068C	PAU8	-1.00134	-1.36391	1.20343	1.108	0.11669	-0.062871
YEL060C	PRB1	-0.08084	-0.230973	0.992606	0.214333	-0.401724	-0.493401
YMR128W	ECM16	-0.08389	-0.599987	1.07058	-0.093093	-0.333073	0.039459
YER098W	UBP9	-0.103417	-0.567272	0.828739	0.058738	-0.207572	-0.009215
YJR149W	YJR149W	-0.036042	-0.546003	1.15854	0.192908	-0.350212	-0.419193
YPL266W	DIM1	-0.136194	-0.044514	0.616578	0.00297	-0.208244	-0.230595
YGL251C	HFM1	-0.582441	-0.995727	1.9107	0.674254	-0.211122	-0.795667
YJL115W	ASF1	-0.036393	-0.368759	0.994974	0.259401	-0.358595	-0.490627
YMR317W	YMR317W	-1.0336	-1.57749	2.5164	1.6746	-0.450168	-1.12974
YGL033W	HOP2	-1.83052	0.664766	1.37203	0.341284	-0.700211	0.15265
YML132W	COS3	-0.832787	-0.832787	1.66437	2.06361	-1.40787	-0.654544
YBR240C	THI2	0.015609	-0.10817	0.697331	0.104953	-0.21665	-0.493073
YIR031C	DAL7	-0.482218	-0.645798	1.20334	0.995066	-0.693599	-0.376791
YLL026W	HSP104	-0.14165	-0.646483	1.15021	0.306834	-0.440442	-0.228474
YJR142W	YJR142W	-0.234257	-0.212185	0.577374	0.229047	-0.251571	-0.108409
YLR225C	YLR225C	-0.23116	-0.303306	0.482458	0.107756	0.140608	-0.196356
YDR507C	GIN4	-0.189763	-0.455562	0.928398	-0.027236	-0.236331	-0.019507
YIL121W	QDR2	-0.382693	-0.057341	1.6024	1.56323	-1.42545	-1.30015
YLR383W	SMC6	-0.232398	-0.356177	0.813848	-0.002945	-0.102088	-0.12024
YCR088W	ABP1	-0.119678	-0.244426	0.59803	0.057608	-0.038645	-0.252889
YNL278W	CAF120	-0.152517	-0.298626	0.784942	0.201019	-0.208535	-0.326282
YOR010C	TIR2	-0.700077	-0.482819	1.23138	0.730303	-0.13562	-0.643162
YGR142W	BTN2	0.033205	-0.191503	0.946253	-0.276522	-0.29105	-0.220384
YJR072C	NPA3	-0.077886	-0.377614	0.686453	0.075998	-0.013164	-0.293786
YOR181W	LAS17	-0.157102	-0.202879	0.579326	0.423046	-0.211824	-0.430568
YOR279C	RFM1	-0.102548	-0.363831	0.853568	0.272791	-0.846707	0.186726
YJL077W-B	YJL077W-B	0.18662	-0.522122	1.15213	1.1885	-0.268032	-1.7371
YGL244W	RTF1	0.196658	-0.436676	0.604596	0.15387	-0.172602	-0.345845
YER176W	ECM32	-0.091179	-0.716089	1.1624	0.084731	-0.3555	-0.084363
YBR026C	ETR1	-0.890134	-0.556232	1.27522	1.03394	-0.449484	-0.413316
YEL075C	YEL075C	-0.658717	-0.658717	1.66932	0.965551	-0.658717	-0.658717
YGR109W-B	YGR109W-B	0.184812	-0.572839	0.565364	-0.196636	0.009649	0.009649
YBR137W	YBR137W	0.050716	-0.13546	0.270515	0.214868	-0.142812	-0.257827
YFL016C	MDJ1	-0.009191	-0.079597	0.481011	-0.056158	-0.136127	-0.199938
YJL037W	IRC18	0.675933	-0.617771	1.64145	1.09285	0.040289	-2.83275
YPR141C	KAR3	-0.302331	-0.168042	0.818159	0.02445	-0.085432	-0.286804
YDL131W	LYS21	-0.193548	-0.276685	0.501956	0.060789	-0.057628	-0.034884
YLR120C	YPS1	-0.392746	-0.237309	0.628899	0.173753	-0.071896	-0.100702
YJL077W-A	YJL077W-A	-0.196521	-0.168297	1.33087	0.80536	-0.066211	-1.7052
YER115C	SPR6	-0.177224	-0.143462	0.537884	0.263768	-0.019433	-0.461533
YIR006C	PAN1	0.073524	-0.335248	0.734493	-0.171703	-0.18218	-0.118886
YDL153C	SAS10	-0.217735	-1.05858	1.56686	0.428002	-0.568051	-0.1505
YOL091W	SPO21	-0.709586	-1.26632	1.46847	0.479922	0.023389	0.004125
YKL041W	VPS24	-0.563346	-0.272087	1.2304	0.123033	-0.433035	-0.084967
YDR299W	BFR2	0.151219	-0.490408	1.0429	-0.20947	-0.373822	-0.120424
YNL240C	NAR1	-0.020851	0.246043	1.06204	0.725912	-0.81654	-1.1966
YML010W	SPT5	0.220701	-0.408313	1.08581	-0.182844	-0.421096	-0.294263
YKL201C	MNN4	-0.193418	-0.396031	0.784076	0.077799	-0.167865	-0.104561
YBR063C	YBR063C	-1.02827	-1.08999	2.14663	0.825561	-0.486895	-0.367031
YHR047C	AAP1	-0.614523	-0.387145	1.27121	0.858164	-0.619904	-0.507808
YDR385W	EFT2	-0.075792	-0.282406	1.14776	0.383346	-0.680172	-0.492741
YNL138W	SRV2	-0.080852	-0.218883	0.34002	0.275086	-0.028687	-0.286684
YDL185W	VMA1	-0.111439	-0.220075	0.54321	0.207079	-0.201345	-0.217429
YMR044W	IOC4	0.001695	-0.290481	0.726361	-0.01798	-0.165675	-0.25392
YIL116W	HIS5	-0.216339	-0.278786	0.301502	0.226721	-0.13636	0.103262
YDL003W	MCD1	-0.337546	-0.308651	0.881385	0.016804	-0.180642	-0.071349
YLR273C	PIG1	-0.234278	-0.073081	0.80061	-0.101694	-0.318093	-0.073464
YER153C	PET122	0.196829	0.129633	1.22683	0.227279	0.005211	-1.78578
YOL112W	MSB4	-0.223815	-0.434009	0.432892	0.396195	-0.027916	-0.143347
YAR035W	YAT1	-0.072878	-0.366582	2.30767	0.803472	-0.412053	-2.25963
YKL089W	MIF2	0.100273	-0.432312	0.862011	0.227685	-0.609938	-0.147718
YER002W	NOP16	0.078081	-0.700201	1.13973	-0.002999	-0.368109	-0.146505
YLR324W	PEX30	0.082811	-0.20662	0.457413	0.20655	-0.177668	-0.362485
Cluster_3	Cluster_3	0	0	0	0	0	0
YHR114W	BZZ1	-0.457359	-0.626085	0.580892	-0.069497	0.237113	0.334936
YOL017W	ESC8	-0.313011	-0.380937	0.657917	0.070299	0.123961	-0.158229
YNL220W	ADE12	-0.445486	-0.562732	0.541077	0.696921	-0.067133	-0.162646
YDR440W	DOT1	-0.275644	-0.536927	0.696103	-0.108704	-0.04677	0.271942
YER055C	HIS1	-0.744715	-0.945527	0.575791	0.657189	0.197678	0.259584
YGR258C	RAD2	-0.254145	-0.74757	0.802978	-0.036948	0.070045	0.16564
YPL239W	YAR1	-0.24026	-0.585482	0.837281	-0.189327	0.005089	0.172699
YLR435W	TSR2	-0.283894	-0.533204	0.623204	-0.112088	0.068809	0.237172
YDR027C	VPS54	-0.312616	-0.609231	0.491261	-0.267752	0.188429	0.509908
YGR083C	GCD2	-0.124843	-0.447123	0.862326	-0.344333	-0.070113	0.124087
YGR009C	SEC9	-0.281987	-0.495033	0.759794	-0.058229	-0.060823	0.136279
YHR201C	PPX1	-0.650261	-0.542966	0.332566	0.428284	0.150481	0.281897
YER130C	YER130C	-0.546373	-0.720976	0.518678	0.020918	0.268929	0.458825
YDR482C	CWC21	-0.473385	-0.40813	0.625881	0.084312	0.057464	0.113858
YBL076C	ILS1	-0.162874	-0.380454	0.470236	-0.125252	-0.017812	0.216155
YJR035W	RAD26	-0.135514	-0.695392	0.811967	-0.273491	0.03602	0.256409
YLL034C	RIX7	-0.173317	-0.525091	0.439474	0.006455	0.049804	0.202674
YDR028C	REG1	-0.061272	-0.699392	0.849062	-0.30577	0.042777	0.174595
YBR059C	AKL1	-0.151291	-0.581294	0.563296	-0.285709	0.191883	0.263115
YDR217C	RAD9	-0.260481	-0.745142	0.871576	-0.370756	0.158261	0.346542
YOL090W	MSH2	-0.327539	-0.411857	0.48752	-0.096139	0.09795	0.250065
YOL145C	CTR9	-0.354668	-0.691708	0.71156	-0.140949	0.067823	0.407942
YLR143W	DPH6	-0.267923	-0.254198	0.482773	0.020528	-0.085416	0.104236
YML093W	UTP14	-0.032978	-0.86962	1.18136	-0.17186	-0.202629	0.095723
YFR016C	YFR016C	0.007955	-0.948293	1.00917	-0.293871	-0.04518	0.270221
YGL174W	BUD13	-0.271864	-0.830046	0.83863	0.162976	0.145328	-0.045024
YOL064C	MET22	-0.571765	-0.48017	0.428341	0.30381	0.208102	0.111682
YMR109W	MYO5	-0.172366	-0.574906	0.792763	0.011969	-0.067904	0.010444
YGR013W	SNU71	-0.262285	-0.588253	0.628394	-0.174248	0.131059	0.265333
YBR079C	RPG1	-0.407048	-0.540449	0.598409	-0.175941	0.091549	0.43348
YKL155C	RSM22	-0.681782	-0.642062	0.534348	-0.055099	0.371487	0.473108
YLR337C	VRP1	-0.232393	-0.946296	0.988777	0.410043	0.054037	-0.274168
YJL013C	MAD3	-0.487126	-0.772186	0.774725	-0.234401	0.326449	0.39254
YDR080W	VPS41	-0.119267	-0.394356	0.573006	-0.11271	0.153647	-0.10032
YKR022C	NTR2	-0.552076	-0.642688	0.883723	-0.182044	0.15197	0.341114
YOL006C	TOP1	-0.076531	-0.717962	0.819671	-0.28899	0.03645	0.227362
YJL050W	MTR4	-0.203179	-0.493075	0.786723	-0.124386	-0.132944	0.166861
YPL256C	CLN2	-0.565513	-0.383326	0.765681	0.201079	-0.13681	0.118888
YEL018W	EAF5	-0.364753	-0.819738	0.97561	0.045212	0.065118	0.098551
YHR029C	YHI9	-0.541167	-0.631779	0.676558	0.685501	0.162879	-0.351992
YKL012W	PRP40	-0.250621	-0.947585	0.834783	-0.196484	0.145349	0.414559
YKL172W	EBP2	0.237028	-1.05547	1.52433	-0.276009	-0.356817	-0.073065
YNL272C	SEC2	-0.188715	-0.454963	0.688825	-0.189445	-0.061016	0.205314
YOR209C	NPT1	-0.353614	-0.431962	0.715896	0.524156	-0.256436	-0.198039
YER073W	ALD5	-0.329272	-0.69497	0.513553	-0.072828	0.368798	0.21472
YKL218C	SRY1	-0.158984	-1.10219	0.631445	0.670716	0.234361	-0.275348
YBR279W	PAF1	-0.244398	-0.655835	0.809512	-0.068898	-0.086607	0.246226
YFL008W	SMC1	-0.300996	-0.651203	1.37194	-0.094681	-0.262184	-0.062873
YOR054C	VHS3	-0.491333	-0.519955	0.608275	-0.283548	0.164439	0.522121
YBR045C	GIP1	-0.69878	-0.915669	0.926985	-0.157741	0.560813	0.284391
YML074C	FPR3	-0.399033	-1.1062	1.04623	0.155891	0.107115	0.195997
YIL019W	FAF1	-0.492991	-0.61677	0.973922	0.026738	-0.014757	0.123858
YMR039C	SUB1	-0.176613	-0.867951	1.11123	-0.136719	0.028748	0.041304
YHR207C	SET5	-0.391819	-0.762611	0.829913	0.011764	0.110793	0.201961
YPR018W	RLF2	-0.068091	-0.520196	0.915548	-0.257033	-0.128603	0.058375
YOR069W	VPS5	-0.240071	-0.729306	0.761032	-0.092	0.011139	0.289206
YIL112W	HOS4	0.122693	-0.916198	1.09987	-0.295939	0.085126	-0.095552
YER127W	LCP5	-0.008208	-0.478437	0.899426	-0.210598	-0.298348	0.096165
YOR195W	SLK19	-0.308582	-0.530541	1.28728	-0.194879	0.049535	-0.302809
YLR086W	SMC4	-0.093324	-0.560155	0.952814	-0.24905	-0.074582	0.024297
YJR151C	DAN4	-0.502978	-0.975263	1.01129	0.31459	0.10836	0.044004
YOL135C	MED7	-0.309621	-0.362141	0.637515	-0.107695	0.116821	0.025121
YOR033C	EXO1	-0.377611	-0.871658	0.493967	-0.343033	0.452821	0.645513
YGL073W	HSF1	-0.496302	-0.563813	0.710717	-0.324496	0.213496	0.460397
YDR068W	DOS2	0.097433	-0.756256	0.937968	-0.164782	-0.052364	-0.062
YIR003W	AIM21	-0.18019	-0.808337	0.813216	-0.291268	0.207918	0.258661
YOR123C	LEO1	-0.153818	-1.23251	1.3297	0.307494	-0.272867	0.021998
YDL040C	NAT1	-0.096724	-0.441208	0.562446	-0.102971	-0.079107	0.157564
YLR419W	YLR419W	-0.12384	-0.567574	0.813572	-0.217176	-0.154924	0.249943
YML043C	RRN11	-0.164307	-0.650656	0.771461	0.173177	-0.203921	0.074245
YKR023W	YKR023W	-0.404914	-0.791728	0.978212	-0.010716	0.085292	0.143854
YPL217C	BMS1	-0.140367	-0.804179	1.00485	-0.043079	-0.142564	0.125335
YIL162W	SUC2	-0.190884	-0.401282	0.435008	0.108702	0.009744	0.038712
YHL013C	OTU2	-0.527032	-0.401452	0.863209	-0.258718	0.123286	0.200707
YML088W	UFO1	-0.229361	-0.464888	0.430772	0.026566	-0.016339	0.25325
YKL215C	OXP1	-0.16793	-0.41804	0.501886	-0.096288	0.149793	0.030579
YNL129W	NRK1	-0.876921	-1.09185	0.873543	0.3526	0.296891	0.445736
YHR129C	ARP1	-0.18307	-0.835228	0.521058	-0.03063	0.347778	0.180092
YLR218C	COA4	-0.463169	-0.586949	0.592543	0.191845	0.139209	0.12652
YNR024W	MPP6	-0.580358	-0.630136	1.06458	-0.153979	0.10938	0.19051
YGR072W	UPF3	-0.015566	-0.624772	1.11003	-0.236078	-0.138022	-0.095589
YPL141C	FRK1	-0.348215	-0.729326	0.842604	-0.471216	0.263435	0.442719
YML058W-A	HUG1	-0.440382	-0.666969	0.69072	-0.067046	0.443774	0.039903
YKR072C	SIS2	-0.310855	-0.622118	0.500438	-0.172177	0.29896	0.305751
YDR358W	GGA1	-0.445064	-0.789442	0.52659	0.120085	0.20412	0.38371
YER080W	AIM9	-0.316463	-0.280256	0.519996	0.045408	-0.034331	0.065646
YLR319C	BUD6	-0.02454	-0.380493	0.621134	-0.107992	-0.1888	0.080692
YMR078C	CTF18	-0.336701	-0.28025	0.649442	-0.100427	-0.057299	0.125234
YML069W	POB3	-0.169689	-0.580515	0.607639	0.133482	0.001571	0.007512
YPR133C	SPN1	-0.000858	-0.61679	0.710768	-0.112359	0.04558	-0.02634
YGR170W	PSD2	-0.454311	-0.515581	0.492065	-0.342286	0.197477	0.622635
YDL060W	TSR1	-0.17445	-0.546157	0.728437	-0.293276	0.015361	0.270084
YJL082W	IML2	-0.474989	-0.921474	0.674595	0.273464	0.273074	0.17533
YDL099W	BUG1	-0.055567	-0.769207	1.26434	-0.293916	-0.135474	-0.01018
YIL063C	YRB2	0.011444	-0.934454	1.02736	-0.288749	0.061211	0.123189
YBR256C	RIB5	-0.363031	-0.432815	0.380091	0.50356	0.049543	-0.137348
YNL084C	END3	-0.255821	-0.492982	0.464049	0.00279	0.08122	0.200745
YKL161C	KDX1	-0.649202	-1.15765	0.516612	0.990383	0.035044	0.264807
YLR355C	ILV5	-0.338245	-0.419734	0.48381	-0.021215	0.137235	0.158149
YNL308C	KRI1	0.163696	-0.860088	1.1796	-0.117616	-0.28407	-0.08152
YNL050C	YNL050C	-0.359756	-0.483535	0.923241	-0.165924	0.051967	0.034007
YPL092W	SSU1	-0.188011	-0.343154	0.585808	0.019545	0.003054	-0.077242
YBR290W	BSD2	-0.257624	-0.67641	0.644402	0.003581	0.100714	0.185338
YHR040W	BCD1	-0.537111	-0.529646	0.858088	0.083679	-0.098678	0.223668
YGL171W	ROK1	-0.307948	-0.652636	0.774805	-0.022035	0.059942	0.147872
YDR287W	INM2	-0.805723	-1.10535	0.931475	0.739126	-0.006237	0.246711
YNL250W	RAD50	-0.176236	-0.618697	0.808645	-0.378184	0.182027	0.182445
YPL110C	GDE1	-0.172318	-0.587476	0.567995	-0.107283	0.060893	0.238188
YDL168W	SFA1	-0.388629	-0.287116	0.386644	0.489751	-0.148793	-0.051856
YDR399W	HPT1	-0.685393	-0.586091	0.770365	0.391694	-0.126239	0.235664
YFL018C	LPD1	-0.338007	-0.465712	0.457723	0.170289	0.179634	-0.003928
YPR167C	MET16	-0.590429	-0.745235	0.629323	0.367825	0.072756	0.26576
YMR193W	MRPL24	-0.268251	-0.658105	0.563227	-0.285479	0.325627	0.322982
YBR275C	RIF1	-0.21933	-0.356254	0.733511	-0.229769	-0.118767	0.190608
YKL028W	TFA1	-0.336775	-0.656745	0.791327	-0.262382	0.120412	0.344163
YKL103C	APE1	-0.182251	-0.502561	0.375284	0.434632	0.001382	-0.126486
YOR222W	ODC2	-0.590989	-0.51546	0.620808	0.506049	0.109637	-0.130045
YHR208W	BAT1	-0.615003	-0.633863	0.769877	0.396885	-0.027127	0.10923
YDR316W	OMS1	-0.178784	-0.59207	0.971155	-0.081746	-0.048474	-0.070082
YDR365C	ESF1	-0.256692	-1.02174	1.07599	0.074003	-0.01996	0.148403
YGR179C	OKP1	-0.445663	-0.687278	0.680317	0.053718	0.141506	0.257401
YPR025C	CCL1	-0.222253	-0.598798	0.432333	-0.391103	0.452378	0.327443
YPR178W	PRP4	-0.456508	-0.551433	0.464612	0.275765	0.099728	0.167835
YLR401C	DUS3	-0.655663	-0.771623	0.837693	-0.04935	0.165404	0.47354
YGL062W	PYC1	-0.473437	-0.681412	1.17646	0.409241	-0.215992	-0.214856
YGL150C	INO80	-0.191699	-0.694283	0.716939	-0.175216	0.000379	0.34388
YDR200C	VPS64	-0.3529	-0.431591	0.73487	-0.243491	0.085533	0.20758
YFR031C	SMC2	-0.157721	-0.662104	0.900343	0.043974	-0.084273	-0.040218
YPR137W	RRP9	-0.183304	-0.478956	0.61784	-0.172879	-0.040583	0.257882
YOL144W	NOP8	-0.189488	-0.588901	0.702498	0.14058	-0.260811	0.196121
YGR276C	RNH70	-0.153092	-0.618845	0.615566	0.043482	0.178038	-0.065148
YLR170C	APS1	-0.046703	-0.623847	0.551603	0.030191	0.067306	0.02145
YER088C	DOT6	-0.351148	-0.2776	0.687051	-0.126875	-0.002837	0.07141
YER004W	FMP52	-0.646359	-0.334553	0.579654	0.723992	-0.028933	-0.293801
YAL025C	MAK16	-0.505629	-0.48421	0.888799	-0.015293	-0.214853	0.331186
YIL104C	SHQ1	-0.414227	-0.652177	0.700151	-0.038063	0.279984	0.124333
YDL001W	RMD1	-0.312504	-0.654188	0.463939	-0.257674	0.246265	0.514163
YKL179C	COY1	-0.302428	-0.633953	0.819529	-0.289027	0.133738	0.272141
YLR278C	YLR278C	-0.348475	-0.467954	0.644161	-0.287012	0.037675	0.421605
YLR309C	IMH1	-0.031481	-1.11395	1.1519	-0.095432	0.197168	-0.108201
YLR182W	SWI6	-0.097403	-0.401996	0.571528	-0.159283	0.003687	0.083466
YOR194C	TOA1	-0.314221	-0.426595	0.680441	-0.018157	0.086737	-0.008206
YOL034W	SMC5	-0.082511	-0.73591	0.880699	-0.152936	-0.026626	0.117284
YDL148C	NOP14	0.018745	-0.707275	1.011	-0.263168	-0.162889	0.103587
YCL054W	SPB1	-0.088863	-0.763657	0.972912	-0.191258	0.044715	0.02615
YPL075W	GCR1	-0.311767	-0.342836	0.636316	-0.051247	-0.050351	0.119884
YCR005C	CIT2	-0.606461	-0.846584	0.695392	0.178055	0.324878	0.25472
Q0115	BI3	-0.160494	-1.15874	1.21066	-0.126191	0.117383	0.117383
YLR015W	BRE2	-0.331308	-0.6701	0.656233	0.053347	0.2029	0.088927
YDR172W	SUP35	-0.152686	-0.687398	0.712538	-0.206855	0.037997	0.296404
YKL108W	SLD2	-0.261428	-0.781136	0.768576	-0.089622	0.131917	0.231693
YBR267W	REI1	-0.297624	-0.442936	0.726235	-0.271896	0.104599	0.181622
YBR152W	SPP381	-0.650693	-0.279708	0.954925	0.031307	-0.279375	0.223543
YPL085W	SEC16	-0.223418	-0.671473	1.07237	-0.00098	-0.163447	-0.01305
YOR239W	ABP140	-0.196758	-0.287371	0.514705	-0.052806	0.009788	0.012443
YDR473C	PRP3	-0.494152	-1.06154	1.03187	0.005228	0.249135	0.269453
YCL032W	STE50	-0.559908	-0.576772	0.827071	0.120912	0.13675	0.051947
YOR375C	GDH1	-0.829884	-1.11983	0.845429	0.605052	0.371031	0.128206
YNL059C	ARP5	-0.137012	-0.54064	0.746254	-0.183164	0.004159	0.110404
YNL166C	BNI5	-0.349425	-0.323826	0.916118	-0.143062	-0.130109	0.030304
YMR311C	GLC8	-0.532307	-0.788537	0.959126	0.022546	0.191378	0.147795
YBR245C	ISW1	-0.186198	-0.578613	0.525407	-0.081131	0.083374	0.237161
YDR496C	PUF6	-0.048991	-0.504164	0.934246	-0.289967	-0.178815	0.087692
YGR208W	SER2	-0.255974	-0.433997	0.513523	0.131363	-0.042906	0.087991
YDL213C	NOP6	-0.330247	-0.641653	1.31271	-0.242975	-0.148097	0.05026
YBR098W	MMS4	-0.168134	-0.461838	0.774297	-0.088251	-0.178001	0.121926
YKR063C	LAS1	-0.655751	-0.716794	0.543886	-0.076945	0.408971	0.496633
YLR200W	YKE2	-0.452846	-0.630397	1.29028	-0.35319	-0.172293	0.31845
YOR130C	ORT1	-0.44356	-0.595629	0.507879	0.434062	0.139801	-0.042553
YLR148W	PEP3	-0.27346	-0.507117	0.628861	-0.108081	0.143731	0.116066
YMR120C	ADE17	-0.447248	-0.553554	0.649562	0.331874	-0.230509	0.249876
YLR304C	ACO1	-0.428618	-0.720668	0.766113	0.405411	-0.044482	0.022244
YDL115C	IWR1	-0.358811	-0.500738	0.713435	0.163491	-0.074696	0.057319
YCL061C	MRC1	-0.095834	-0.756941	0.884173	-0.248507	-0.033366	0.250474
YDR026C	NSI1	0.028699	-0.728023	0.922138	-0.35774	0.046899	0.088027
YPR143W	RRP15	-0.374559	-0.820266	1.19794	-0.318231	0.192815	0.122297
YOR216C	RUD3	-0.200791	-0.985768	1.20753	-0.167432	0.005287	0.141174
YIL149C	MLP2	-0.182434	-0.929577	1.11464	-0.417569	0.072279	0.342658
YBR237W	PRP5	-0.379794	-0.475559	0.78366	-0.143448	0.154907	0.060235
YPL221W	FLC1	-0.297661	-0.283875	0.412373	-0.017399	0.065124	0.121439
YDR117C	TMA64	-0.181923	-0.44923	0.508327	-0.096442	0.083902	0.135366
YBR198C	TAF5	-0.107934	-0.34719	0.595262	-0.139553	0.007985	-0.00857
YJL035C	TAD2	-1.0227	-0.687049	0.565911	0.529926	0.346014	0.267898
YKL166C	TPK3	-0.458507	-0.831458	0.902368	0.345032	0.031053	0.011512
YLR314C	CDC3	-0.205001	-0.485782	0.772095	-0.11203	-0.014226	0.044942
YJL168C	SET2	-0.195774	-0.489478	0.556935	-0.052025	-0.002728	0.183069
YDL065C	PEX19	-0.253344	-0.98346	0.982259	0.053391	0.099358	0.101796
YKL110C	KTI12	-0.351114	-0.492668	0.66969	0.193909	-0.197439	0.177622
YOR329C	SCD5	-0.173952	-0.581038	0.510684	-0.092524	0.144804	0.192026
YGR264C	MES1	-0.265761	-0.457224	0.492396	-0.092487	0.055934	0.267143
YOL041C	NOP12	-0.213902	-0.659609	0.699774	-0.281562	0.141224	0.314075
YJR002W	MPP10	-0.154205	-0.793285	0.452688	0.239265	0.060266	0.19527
YJR134C	SGM1	-0.285783	-0.77145	0.88782	-0.461611	0.28208	0.348944
YLR335W	NUP2	-0.203986	-0.54129	0.60515	-0.248286	0.142747	0.245665
YAR015W	ADE1	-0.336936	-0.315962	0.238876	0.347412	-0.14697	0.213581
YDR122W	KIN1	-0.270222	-0.60882	0.615326	-0.170325	0.146436	0.287606
YNL257C	SIP3	-0.318494	-0.624622	0.611791	-0.197042	0.088113	0.440254
YFL042C	YFL042C	-0.422968	-0.862027	0.470324	-0.1045	0.387911	0.531261
YJL127C	SPT10	-0.185528	-0.520811	0.678107	-0.050622	-0.133827	0.212681
YER048C	CAJ1	-0.063782	-0.785015	0.929883	-0.145096	0.032975	0.031034
YNL275W	BOR1	-0.66866	-0.35948	0.879238	0.357806	-0.098727	-0.110177
YOR140W	SFL1	-0.286003	-0.580453	0.48077	-0.200171	0.265294	0.320563
YGR015C	YGR015C	-0.331838	-0.400122	0.675497	0.571264	-0.259243	-0.255558
YDR088C	SLU7	-0.712391	-1.26913	1.10873	0.248848	0.020584	0.603355
YHR112C	YHR112C	-0.72626	-0.488219	0.682663	0.438788	0.063462	0.029566
YPL146C	NOP53	-0.013997	-0.847186	1.15456	-0.258554	0.017629	-0.052449
YDL161W	ENT1	-0.428698	-0.895164	1.13468	0.107814	-0.179743	0.261114
YCL025C	AGP1	-0.487098	-0.637575	1.0473	0.603084	-0.235842	-0.289872
YOR056C	NOB1	-0.224746	-0.429826	0.716569	-0.093018	-0.134513	0.165535
YJL123C	MTC1	-0.096318	-0.668371	1.00763	-0.211036	-0.0208	-0.011105
YEL012W	UBC8	-0.460369	-0.866548	0.598255	0.142415	0.307371	0.278876
YER030W	CHZ1	-0.204734	-0.691083	1.02558	-0.422166	0.121301	0.171107
YKR095W	MLP1	-0.125573	-0.901207	1.19888	-0.382531	-0.055649	0.266084
YER067W	RGI1	-0.218502	-1.30164	0.680739	0.305147	-0.008021	0.542277
YDR168W	CDC37	-0.459044	-0.600381	0.790338	-0.088305	0.109388	0.248003
YKL101W	HSL1	-0.270064	-0.336212	0.87042	-0.227183	-0.154166	0.117204
YBL035C	POL12	-0.154352	-0.292345	0.543271	-0.043537	-0.172905	0.119868
YHR211W	FLO5	-0.49464	-0.711529	1.08137	0.046399	-0.042402	0.120799
YJL104W	PAM16	-0.46342	-0.296522	0.511266	-0.040076	0.116923	0.171828
YIL154C	IMP2'	-0.535495	-0.203904	0.86038	0.151875	0.082366	-0.355223
YPR145W	ASN1	-0.401725	-0.643737	0.876662	0.335033	-0.176955	0.010721
YMR165C	PAH1	-0.542398	-0.773438	0.904962	0.137976	0.156301	0.116596
YNL106C	INP52	-0.235023	-0.308039	0.514049	-0.027884	-0.057791	0.114687
YMR229C	RRP5	-0.050421	-0.469063	0.853575	-0.240183	-0.275252	0.181343
YKL113C	RAD27	-0.387821	-0.475681	0.750502	-0.03046	-0.023046	0.166506
YKL001C	MET14	-0.44328	-0.441206	0.668202	0.084347	-0.013652	0.14559
YLR298C	YHC1	-0.101827	-0.632782	0.629421	0.07784	-0.044273	0.071622
YMR273C	ZDS1	-0.106728	-0.464098	0.897568	-0.249433	-0.108725	0.031417
YDR311W	TFB1	-0.268643	-0.446004	0.738139	-0.200674	-0.065084	0.242265
YGL049C	TIF4632	-0.194395	-0.622497	0.88893	-0.279907	-0.053571	0.26144
YCL059C	KRR1	-0.33277	-0.605146	0.743288	-0.064023	0.045144	0.213507
YIL026C	IRR1	-0.180986	-0.522271	0.747882	-0.062781	-0.122166	0.140321
YJL153C	INO1	-0.427993	-0.505478	0.698458	0.119104	0.297697	-0.181787
YBR248C	HIS7	-0.356936	-0.712955	0.417392	0.455301	0.055213	0.141985
YPL204W	HRR25	-0.389752	-0.421217	0.547801	-0.192746	0.128329	0.327585
YDR259C	YAP6	-0.436331	-0.515716	0.606	-0.357634	0.293893	0.409788
YGL117W	YGL117W	-0.551394	-0.702654	0.92324	0.665081	-0.316114	-0.018159
YDR213W	UPC2	-0.15383	-0.440656	0.700219	-0.256045	0.009539	0.140773
YNL110C	NOP15	-0.082417	-0.498551	0.987747	-0.175354	-0.067584	-0.163842
YGR140W	CBF2	-0.363616	-0.303312	0.643962	-0.027906	0.120702	-0.06983
YNL079C	TPM1	-0.1724	-0.615357	0.657278	-0.10013	0.096414	0.134196
YLR051C	FCF2	-0.404017	-0.651532	1.00103	0.192673	-0.159751	0.021597
YJR137C	MET5	-0.365009	-0.63222	0.708813	0.057587	-0.072718	0.303548
YDR097C	MSH6	-0.258656	-0.575577	0.673195	-0.181428	0.048131	0.294334
YDR083W	RRP8	-0.421549	-0.965232	0.949604	-0.197276	0.249329	0.385124
YNL102W	POL1	-0.037328	-0.585471	0.648907	-0.057805	0.022847	0.008849
YDR049W	VMS1	-0.102761	-0.741114	0.474937	-0.047769	0.150406	0.266301
YKL045W	PRI2	-0.278178	-0.469071	0.750347	-0.128398	-0.083737	0.209036
YKL054C	DEF1	-0.088509	-0.512577	1.0431	-0.241056	-0.217824	0.016861
YDR295C	HDA2	-0.091992	-0.684158	0.881662	-0.244497	-0.019981	0.158967
YOL100W	PKH2	-0.396428	-0.674013	0.519618	-0.378428	0.334964	0.594288
YKL063C	YKL063C	-0.625624	-0.616137	0.79557	-0.06224	0.194346	0.314084
YPR080W	TEF1	-0.607003	-0.593147	0.6271	0.235215	0.216269	0.121566
YNL175C	NOP13	-0.209932	-0.599301	0.81892	-0.204863	-0.017157	0.212333
YPL056C	LCL1	-0.320585	-1.2099	0.826928	-0.066317	0.307225	0.462649
YPL153C	RAD53	-0.201024	-0.347345	0.553239	-0.025495	-0.163077	0.183702
YJR057W	CDC8	-0.608553	-0.296747	0.711627	0.486345	-0.087051	-0.205621
YGR270W	YTA7	-0.086759	-0.612524	0.887718	-0.292207	-0.110726	0.214497
YPL181W	CTI6	-0.12168	-0.773838	0.910949	-0.234876	0.059035	0.16041
YLR095C	IOC2	-0.35063	-0.534322	0.734816	-0.177195	0.086862	0.240468
YPL043W	NOP4	-0.057828	-0.594103	0.988785	-0.172141	-0.145464	-0.019248
YFL023W	BUD27	-0.358939	-1.13253	1.24708	-0.235496	0.217774	0.262115
YCL009C	ILV6	-0.336728	-0.223149	0.710521	0.411826	0.008433	-0.570904
YHR065C	RRP3	-0.396764	-0.570125	0.77715	0.104747	-0.109585	0.194577
YLR103C	CDC45	-0.445487	-0.29029	0.607976	0.052089	-0.101051	0.176762
YGR283C	YGR283C	-0.529493	-0.598131	0.811029	-0.154154	0.179521	0.291228
YML053C	YML053C	-0.509818	-0.938452	0.686477	-0.292924	0.437628	0.617089
YNL215W	IES2	0.142453	-1.06379	0.963578	0.144333	0.009729	-0.196304
YDR412W	RRP17	-0.234512	-0.670882	0.892875	-0.20021	0.258368	-0.04564
YGL223C	COG1	-0.301497	-0.322182	0.519628	-0.097982	-0.058177	0.260211
YMR263W	SAP30	-0.230457	-0.656799	1.12339	-0.125147	0.082717	-0.193705
YMR219W	ESC1	-0.076932	-0.99485	0.979241	-0.220431	0.057798	0.255174
YMR014W	BUD22	-0.214908	-0.699435	1.17971	-0.162842	-0.16331	0.060784
YDR515W	SLF1	-0.116807	-0.488513	0.877348	-0.28248	0.013504	-0.003051
YJL213W	YJL213W	-0.93346	-0.732783	0.740814	0.425972	0.317429	0.182028
YDR137W	RGP1	-0.298754	-0.481831	0.565049	-0.123725	0.151546	0.187714
YER161C	SPT2	-0.087253	-0.433424	0.570981	-0.059837	-0.086225	0.095759
YGL241W	KAP114	-0.258854	-0.317538	0.390947	-0.023975	0.027575	0.181845
YKL143W	LTV1	-0.157413	-0.542317	0.924733	-0.179618	-0.085598	0.040212
YJL020C	BBC1	-0.111842	-0.636061	0.725917	-0.157818	0.093508	0.086297
YDR289C	RTT103	-0.434066	-0.752662	0.675838	0.098621	0.345557	0.066712
YDL005C	MED2	-0.142102	-0.364659	0.732726	-0.208094	-0.011792	-0.006079
YDR176W	NGG1	-0.119022	-0.694497	0.879357	-0.398913	0.130341	0.202734
YPL070W	MUK1	-0.259999	-0.566185	0.578281	-0.38288	0.198151	0.432631
YLR187W	SKG3	-0.320362	-0.404143	0.509883	-0.110438	0.104976	0.220083
YLR449W	FPR4	-0.579031	-0.690043	0.981487	-0.206056	0.129816	0.363828
YDR087C	RRP1	-0.383515	-0.417408	0.826515	-0.15777	0.035365	0.096813
YKL129C	MYO3	-0.377067	-0.89238	0.736502	-0.021004	0.202374	0.351575
YHR066W	SSF1	-0.153778	-0.885789	1.25656	0.125492	-0.359895	0.017414
YOR127W	RGA1	-0.503287	-0.733726	0.615793	-0.240446	0.448991	0.412675
YLR206W	ENT2	-0.249708	-0.547955	0.535478	-0.253173	0.114534	0.400824
YGR152C	RSR1	-0.990894	-0.7632	0.976397	0.703753	-0.060353	0.134297
YNL225C	CNM67	-0.253855	-0.633473	0.867779	-0.26102	0.183884	0.096687
YML114C	TAF8	-0.617948	-0.382478	0.624745	-0.292151	0.146234	0.521597
YDR073W	SNF11	-0.49547	-0.77679	0.552902	-0.285481	0.513825	0.491014
YKL132C	RMA1	-0.609722	-0.470466	0.396435	0.333265	-0.123267	0.473755
YOR198C	BFR1	-0.279078	-0.570096	0.840929	-0.117684	-0.023013	0.148942
YOR304W	ISW2	-0.24463	-0.641428	0.716504	-0.238928	0.188346	0.220136
YKR090W	PXL1	-0.277088	-0.315751	0.595545	0.076696	-0.262919	0.183517
YPL199C	YPL199C	-0.470978	-0.869514	0.823358	-0.199822	0.247072	0.469883
YPL248C	GAL4	-1.08518	-0.699947	0.985407	0.582582	0.275427	-0.058289
YLR238W	FAR10	-0.44426	-0.414005	0.711358	-0.124521	0.106159	0.165268
YPR035W	GLN1	-0.576002	-0.723988	0.847291	0.037008	-0.031254	0.446944
YML071C	COG8	-0.141596	-0.973609	1.05188	0.172229	-0.196841	0.087931
YJL074C	SMC3	-0.333009	-0.716174	1.29739	0.066398	-0.184551	-0.130056
YBR298C	MAL31	-0.791461	-0.730815	0.399121	0.71099	0.127346	0.28482
YGR186W	TFG1	-0.109602	-0.608735	0.949689	-0.132359	-0.111632	0.012639
YNL224C	SQS1	-0.036316	-0.494514	0.981049	-0.29463	-0.170462	0.014873
YER082C	UTP7	-0.099527	-0.463867	0.793134	-0.281176	-0.050232	0.101668
Cluster_4	Cluster_4	0	0	0	0	0	0
YML054C	CYB2	0.737436	-1.73133	-1.12747	-0.146242	0.844684	1.42292
YDL243C	AAD4	-2.50881	-2.72989	-0.300565	-0.575165	3.1396	2.97483
YFL020C	PAU5	-2.78027	-3.40362	0.588292	0.154651	3.04063	2.40032
YOL153C	YOL153C	-0.852756	-0.535962	-3.91699	-2.07327	3.55766	3.82131
YPR007C	REC8	-0.253744	-2.37752	-2.51062	-2.08194	3.47648	3.74735
YOL161C	PAU20	-3.23229	-3.14456	-2.34477	-2.36981	5.85681	5.23462
YJL052W	TDH1	-1.71092	-1.79288	-0.640225	-0.932318	2.78862	2.28772
YHL046C	PAU13	-2.68228	-4.44542	-2.99356	-2.41287	6.76722	5.76691
YMR206W	YMR206W	-2.25632	-2.3801	-0.705843	0.030962	2.75663	2.55467
YFL014W	HSP12	-1.82075	-3.5295	-0.340667	-1.23391	2.91442	4.01041
YKL224C	PAU16	-1.45843	-2.31917	-2.10566	-2.10566	4.44271	3.54622
Q0255	Q0255	-0.090071	-2.50336	-1.41406	-1.71473	2.95585	2.76638
YDR523C	SPS1	-1.31332	-1.4371	-0.347807	-3.31144	3.13892	3.27075
YOR343W-B	YOR343W-B	-0.679612	-1.12532	0.201013	-3.4147	2.50931	2.50931
YDL196W	YDL196W	-0.525036	-0.565713	-2.28377	0.144909	1.42534	1.80427
YMR058W	FET3	-2.42581	-0.742234	0.56524	-0.838967	1.56248	1.87929
YDR343C	HXT6	-0.773351	-2.48209	-0.392799	1.03588	0.434961	2.1774
Q0075	AI5_BETA	-0.428618	-0.428618	-0.428618	-4.03395	2.67944	2.64036
YHR214W-A	YHR214W-A	-0.814451	-0.814451	-3.13168	-3.28796	4.02369	4.02485
YOL158C	ENB1	-2.21688	-6.30671	0.845594	0.491375	3.40681	3.77981
YDR342C	HXT7	0.64938	-0.696791	-3.41485	0.719872	0.431767	2.31062
YHL047C	ARN2	-2.86766	-2.86766	0.505872	-0.224482	2.45106	3.00287
YIR044C	YIR044C	-0.805521	-0.192335	-1.0624	-2.80364	2.38368	2.48021
YDR077W	SED1	-2.30733	-2.33209	-0.1228	-0.639992	2.46432	2.9379
YDR277C	MTH1	-0.620275	-3.20349	-0.014656	-0.492863	2.17989	2.15139
YNL276C	YNL276C	-0.679378	-2.38812	0.286137	-1.09254	1.95343	1.92046
YLL025W	PAU17	-3.20479	-3.46243	0.795359	0.621301	3.05949	2.19107
YJR025C	BNA1	-1.94093	-2.06471	-0.460845	0.308875	1.85234	2.30527
YIR041W	PAU15	-1.87148	-3.1879	-3.12836	-2.69967	5.75169	5.13572
YNL034W	YNL034W	-3.65476	-3.77854	1.61192	0.739436	2.47555	2.60639
YNL270C	ALP1	-1.28144	-0.820253	-1.53832	1.60397	0.656228	1.37981
YAR020C	PAU7	-3.38685	-3.64813	-0.745609	-0.783707	4.61942	3.94489
YDR542W	PAU10	-0.424819	-2.18796	-0.424819	-2.47734	2.45845	3.05649
YOR028C	CIN5	-1.78752	-1.32633	-1.45943	0.142438	1.80223	2.62861
YMR230W-A	YMR230W-A	-0.637969	-1.34671	0.690116	-1.63609	1.90738	1.02327
YDR210C-D	YDR210C-D	-1.48707	-0.803496	-3.74395	2.01151	2.01151	2.01151
YOL052C-A	DDR2	-1.2831	-1.2831	-1.2831	0.950974	0.494442	2.40389
Cluster_5	Cluster_5	0	0	0	0	0	0
Q0297	Q0297	-2.25257	-2.25257	1.39154	1.16126	1.26416	0.688175
YMR118C	SHH3	0.34443	-2.1219	0.914926	0.173684	0.34443	0.34443
YGR288W	MAL13	-3.01137	-3.45708	1.96441	1.58446	1.41172	1.50785
YOL058W	ARG1	-0.841618	-1.61747	0.714268	0.650887	0.613003	0.480934
YOR032C	HMS1	-2.02031	-2.14409	0.722812	-0.433467	2.0642	1.81086
YGR169C-A	YGR169C-A	-0.268637	-1.68787	1.27419	-0.436681	0.59864	0.520362
YGR287C	IMA1	-1.77753	-2.09395	0.587649	0.22717	1.5076	1.54905
YKL165C-A	YKL165C-A	-2.55437	-0.356224	1.43668	0.491902	0.482828	0.499188
YLL028W	TPO1	-1.86729	-2.16955	1.57384	1.00266	0.490645	0.969691
YHR018C	ARG4	-1.35787	-1.70234	0.59443	0.807099	0.977186	0.681492
YAR071W	PHO11	-2.05439	-1.76313	0.911126	0.532455	1.44516	0.928783
YOL159C	YOL159C	-2.95244	-2.95244	1.6097	1.58567	1.35304	1.35646
YLR037C	PAU23	-1.65985	-2.09723	0.461014	0.288451	1.6763	1.33132
YER133W-A	YER133W-A	-1.68831	-1.22712	1.30274	0.805427	1.02697	-0.219708
YJR161C	COS5	-2.27967	-2.27967	2.33291	1.95007	-0.028562	0.304925
YBR208C	DUR1,2	-1.76895	-1.94627	1.62756	1.04787	0.396407	0.64338
YDR539W	FDC1	-1.30824	-1.98896	1.09338	1.1949	0.644173	0.364747
YCL030C	HIS4	-1.34211	-1.68238	1.14548	1.10353	0.403259	0.372208
YDL244W	THI13	-0.929459	-2.6382	1.2287	0.657384	1.07532	0.606253
YKL202W	YKL202W	-2.89374	-1.43256	1.80357	0.534402	1.07787	0.910458
YOR298W	MUM3	-1.28741	-1.77376	0.976945	0.439359	0.970651	0.674223
YMR269W	TMA23	-0.707767	-2.41651	1.84271	0.753545	0.837581	-0.309559
YNR072W	HXT17	-1.75322	-1.877	0.311827	0.418582	1.18444	1.71538
YAR033W	MST28	-2.60045	-0.003434	0.950026	0.156317	0.529859	0.967683
Cluster_6	Cluster_6	0	0	0	0	0	0
YMR304W	UBP15	-0.2684	-0.662079	0.354242	-0.105181	0.269437	0.41198
YJL073W	JEM1	-0.55142	-0.300322	0.39275	-0.121081	0.253165	0.326909
YJL034W	KAR2	-0.502984	-0.494857	0.270065	-0.090645	0.465372	0.353049
YJR109C	CPA2	-1.01324	-1.29481	0.552934	0.520232	0.723534	0.511352
YLR429W	CRN1	-0.351319	-0.373418	0.436937	-0.057074	0.077515	0.267358
YOL053W	AIM39	-0.388702	-0.848084	0.211462	-0.037927	0.242506	0.820745
YNL155W	YNL155W	-0.639482	-0.71173	0.441222	-0.342145	0.484256	0.767879
YBR128C	ATG14	-0.981827	-0.335088	0.100097	-0.528251	0.943663	0.801406
YNL301C	RPL18B	-0.580794	-0.254101	0.196185	-0.353201	0.511531	0.48038
YDR258C	HSP78	-0.199398	-0.488333	0.394549	-0.11851	0.249652	0.16204
YLR194C	YLR194C	-0.430856	-0.476264	0.212605	-0.350605	0.361682	0.683438
YDL166C	FAP7	-0.877364	-0.811318	0.196676	-0.38363	0.882303	0.993333
YML128C	MSC1	-0.555487	-0.804797	0.133187	-0.447407	0.665426	1.00908
YJR133W	XPT1	-0.666119	-0.625512	0.46695	0.022745	0.426389	0.375548
YOR259C	RPT4	-0.22627	-0.4834	0.418708	-0.099346	0.187508	0.202799
YOR316C	COT1	-0.533759	-0.811396	-0.085714	0.021468	0.771102	0.638299
YCL018W	LEU2	-0.870743	-0.742135	0.122538	0.066736	0.732119	0.691485
YML027W	YOX1	-0.574636	-0.254808	0.410327	0.146429	0.081744	0.190944
YKL122C	SRP21	-0.548791	-0.31	0.523349	-0.143468	0.101058	0.377853
YFL028C	CAF16	-0.425394	-0.363222	0.340449	0.095062	0.240706	0.112399
YHR011W	DIA4	-0.701665	-0.807066	0.550471	0.026041	0.437864	0.494355
YLL060C	GTT2	-0.482409	-0.878268	-0.435506	-0.012923	1.02294	0.786164
YGR017W	YGR017W	-0.427235	-0.442373	0.420786	-0.321392	0.271828	0.498385
YGR243W	FMP43	-1.18566	-0.861981	0.419958	0.189678	0.614501	0.823505
YNL208W	YNL208W	-0.738503	-0.386966	0.312372	0.108165	0.484316	0.220616
YMR291W	TDA1	-0.873351	-0.755267	0.254829	0.370785	0.495683	0.50732
YNL134C	YNL134C	-0.788682	-0.689344	-0.144098	0.742491	0.408627	0.471006
YER134C	YER134C	-0.439102	-0.503292	0.133552	0.18633	0.366018	0.256493
YGR205W	TDA10	-0.39369	-0.437299	0.273261	0.15557	0.268403	0.133755
YHL048W	COS8	-0.759431	-1.03656	-0.176417	-0.452696	1.2209	1.20421
YGR289C	MAL11	-1.40451	-1.40451	0.049421	-0.521896	1.53059	1.75092
YLR345W	YLR345W	-0.420269	-0.544048	0.077276	-0.252651	0.529888	0.609803
YKR053C	YSR3	-0.507325	-0.663672	0.175676	0.207538	0.642633	0.14515
YHR179W	OYE2	-0.544705	-0.36859	0.044866	-0.074326	0.501736	0.441018
YHR067W	HTD2	-0.909025	-0.745923	0.556563	-0.071221	0.577429	0.592177
YJR005W	APL1	-0.271997	-0.506116	0.441172	-0.19374	0.180242	0.350438
YHL044W	YHL044W	-1.05528	-0.836167	-0.154005	-0.44228	1.24496	1.24277
YDL124W	YDL124W	-1.0277	-1.11441	-0.364515	-0.317559	1.4616	1.36258
YFR036W	CDC26	-0.550239	-0.41622	0.095587	-0.297133	0.304437	0.863567
YDL104C	QRI7	-0.72467	-0.410328	0.086624	-0.137827	0.559968	0.626233
YDR425W	SNX41	-0.34201	-0.450603	0.298301	-0.410519	0.350179	0.554652
YDL027C	YDL027C	-0.499493	-0.39379	0.173551	-0.444201	0.413081	0.750852
YLR257W	YLR257W	-0.561909	-0.540968	0.322016	-0.145639	0.46162	0.464881
YOR074C	CDC21	-0.503055	-0.2775	0.344864	0.117965	0.14479	0.172935
YBR103W	SIF2	-0.483214	-0.525117	0.20627	0.114121	0.290531	0.397409
YOL125W	TRM13	-0.490893	-0.540126	0.342261	-7.7e-05	0.363207	0.325628
YKL151C	YKL151C	-1.07024	-0.711419	-0.347018	-0.351294	1.15102	1.32896
YPR048W	TAH18	-0.56081	-0.51076	0.424673	-0.088345	0.217573	0.517668
YDL198C	GGC1	-0.705999	-0.492309	-0.390119	0.054814	0.834131	0.699483
YNL317W	PFS2	-0.431707	-0.461619	0.455516	-0.169826	0.143635	0.464001
YGL227W	VID30	-0.278666	-0.681076	0.34315	-0.253701	0.399949	0.470344
YJR010W	MET3	-0.458846	-0.342009	-0.052023	-0.201099	0.389494	0.664484
YOR153W	PDR5	-0.313916	-0.42183	0.112541	-0.093696	0.248667	0.468234
YKR077W	MSA2	-0.553751	-0.471079	-0.008568	-0.102563	0.480982	0.65498
YOL084W	PHM7	-1.06187	-0.914347	-0.078697	-0.355728	1.3294	1.08124
YER059W	PCL6	-0.467598	-0.538525	0.220663	-0.212134	0.303983	0.69361
YKR036C	CAF4	-0.654752	-0.465744	0.319414	-0.023055	0.365134	0.459003
YIL021W	RPB3	-0.450463	-0.36425	0.265818	-0.055316	0.284618	0.319593
YDR065W	RRG1	-0.671678	-0.445873	0.518127	-0.424322	0.337326	0.68642
YOL149W	DCP1	-0.573676	-0.321589	0.532016	-0.004111	0.164317	0.203044
YGL009C	LEU1	-0.467008	-0.644348	0.362019	-0.009897	0.279694	0.47954
YDR085C	AFR1	-0.708728	-1.15444	0.157251	-0.29181	0.952097	1.04563
YOR089C	VPS21	-0.666184	-0.723874	0.231757	-0.013251	0.486495	0.685057
YGL179C	TOS3	-0.752437	-0.708572	0.519885	0.127328	0.394867	0.418928
YLR078C	BOS1	-0.505847	-0.316686	0.550215	-0.070011	0.200437	0.141892
YPL222C-A	YPL222C-A	-1.01493	-0.87568	0.26424	0.379263	0.793448	0.453663
YDR001C	NTH1	-0.300095	-0.82297	0.196727	0.026117	0.440338	0.459882
YKL213C	DOA1	-0.461787	-0.556695	0.220904	-0.104071	0.402741	0.498909
YIL101C	XBP1	-0.639371	-0.76315	-0.204371	-0.752968	1.03843	1.32143
YBR030W	RKM3	-0.54979	-0.516469	0.315667	-0.307393	0.453828	0.604157
YJR153W	PGU1	-1.07927	-1.03437	0.230049	0.039373	1.23456	0.60966
YMR081C	ISF1	-0.842361	-0.84061	0.29931	-0.071094	0.635872	0.818882
YFL041W-A	YFL041W-A	-1.83514	-0.373957	0.286493	-0.046664	1.14317	0.826102
YGR028W	MSP1	-0.542359	-0.260982	0.242021	-0.122367	0.269712	0.413975
YLR080W	EMP46	-0.695419	-0.736736	-0.454797	-0.066756	1.07535	0.878361
YGR122W	YGR122W	-0.888079	-0.854757	0.365781	0.013011	0.606928	0.757116
YML097C	VPS9	-0.524884	-0.319503	0.271612	0.051044	0.173373	0.348358
YHR204W	MNL1	-0.404691	-0.269424	0.119519	-0.297016	0.307592	0.54402
YGL156W	AMS1	-0.693308	-0.889583	0.005855	0.022274	0.788808	0.765954
YOR215C	AIM41	-0.439848	-0.826662	0.303274	-0.794111	0.629062	1.12828
YLL039C	UBI4	-0.6165	-0.943017	-0.242669	-0.115696	1.09185	0.826028
YGL208W	SIP2	-1.19274	-0.316521	0.167052	-0.086524	0.758599	0.670135
YNL206C	RTT106	-0.493838	-0.597717	0.423655	-0.188177	0.432332	0.423745
YDR229W	IVY1	-0.326307	-0.572076	0.511143	-0.074448	0.075677	0.386011
YKL091C	YKL091C	-0.425891	-0.751304	0.142398	0.222353	0.53841	0.274033
YIL035C	CKA1	-0.342497	-0.654039	0.240448	-0.038384	0.300919	0.493553
YHR043C	DOG2	-1.35139	-0.914702	0.614124	0.527936	0.715617	0.408416
YDR127W	ARO1	-0.268514	-0.638594	0.353748	0.083472	0.170955	0.298933
YGL209W	MIG2	-0.430506	-0.562822	0.023818	-0.24599	0.643391	0.572109
YIL068C	SEC6	-0.649225	-0.968824	0.571375	-0.171861	0.57246	0.646075
YGR180C	RNR4	-0.666004	-0.445888	0.410851	0.114208	0.305025	0.281808
YDL219W	DTD1	-0.60653	-0.304301	0.201201	-0.07583	0.342106	0.443354
YBR203W	COS111	-0.233229	-0.614608	0.435416	-0.171366	0.318908	0.264879
YIL066C	RNR3	-1.45462	-0.839596	-0.268025	-0.507761	1.3923	1.6777
YJL103C	GSM1	-0.915306	-0.522027	0.255237	-0.291626	0.546848	0.926875
YGR167W	CLC1	-0.492361	-0.311431	0.241563	0.032018	0.218831	0.311379
YOR201C	MRM1	-0.31047	-0.464837	0.396902	0.070698	0.11118	0.196526
YIL033C	BCY1	-0.387127	-0.300486	-0.015116	-0.236227	0.359164	0.579791
YLL018C	DPS1	-0.366091	-0.55212	0.181934	0.082095	0.29964	0.354543
YPR021C	AGC1	-0.33838	-0.476373	0.075133	-0.315437	0.511823	0.543234
YNR066C	YNR066C	-0.405833	-0.483808	0.146859	-0.33578	0.461443	0.617118
YOR118W	RTC5	-0.317256	-0.561787	0.290731	0.004445	0.226775	0.357091
YJL138C	TIF2	-0.589839	-0.641632	0.351705	-0.293808	0.344948	0.828626
YLL029W	FRA1	-0.265295	-0.527826	0.414037	-0.046023	0.199865	0.225243
YJL132W	YJL132W	-0.491441	-0.738077	0.266328	0.167193	0.346088	0.44991
YFR027W	ECO1	-0.769885	-0.893664	0.665115	0.070715	0.414873	0.512846
YLR359W	ADE13	-0.314444	-0.258262	0.320383	0.100112	-0.063726	0.215937
YOL117W	RRI2	-0.460782	-0.564798	0.345605	-0.099652	0.478304	0.301323
Q0130	OLI1	-0.761717	-0.952826	0.26378	0.507304	0.718379	0.225079
YLR313C	SPH1	-0.446437	-0.543249	0.363181	-0.128083	0.313505	0.441082
YPL272C	YPL272C	-0.590425	-0.736512	0.114223	-0.074691	0.650392	0.637013
YNL015W	PBI2	-0.653259	-0.654554	0.1784	-0.20529	0.813516	0.521187
YDL116W	NUP84	-0.294745	-0.431748	0.371325	-0.1784	0.199013	0.334555
YKL178C	STE3	-1.14359	-0.682403	0.456497	0.456497	0.456497	0.456497
YMR140W	SIP5	-0.486876	-0.658635	0.375866	-0.041587	0.344911	0.466323
YDR267C	CIA1	-0.692276	-0.299657	0.139383	0.145375	0.273805	0.43337
YFR017C	IGD1	-1.06509	-0.60391	-0.395972	-0.407861	1.44373	1.02911
YJL164C	TPK1	-0.43552	-0.44	0.16844	-0.109226	0.368191	0.448116
YDR320C	SWA2	-0.351821	-0.482942	0.420302	-0.080968	0.206287	0.289141
YGL242C	YGL242C	-0.431878	-0.389879	0.214937	0.024101	0.223614	0.359104
YER014W	HEM14	-0.389372	-0.34735	0.379599	-0.123256	0.250286	0.230092
YBL101C	ECM21	-0.342231	-0.578025	0.290918	-0.292008	0.341823	0.579523
YKL120W	OAC1	-0.535886	-0.57631	0.357361	0.274115	0.352684	0.128036
YIR042C	YIR042C	-1.04733	-1.00673	-0.162192	0.082408	1.20799	0.925854
YJL031C	BET4	-0.430376	-0.652335	0.495272	-0.047066	0.246423	0.388081
YNL242W	ATG2	-0.334341	-0.46417	0.16255	-0.136612	0.32973	0.442843
YLR348C	DIC1	-0.665207	-0.487142	-0.096796	0.369538	0.663554	0.216052
YDL089W	NUR1	-0.541404	-0.293999	0.357173	-0.071478	0.313727	0.235981
YKR011C	YKR011C	-0.683291	-0.709773	0.086426	0.038002	0.67037	0.598266
YGR032W	GSC2	-0.415968	-0.947169	0.223491	-0.19885	0.639572	0.698924
YPR045C	THP3	-0.279468	-0.409426	0.036233	-0.343821	0.41093	0.585552
YNR049C	MSO1	-0.715195	-0.53412	0.517893	0.097068	0.316337	0.318017
YBL033C	RIB1	-0.472173	-0.55473	0.575206	0.057082	0.184787	0.209828
YKL219W	COS9	-0.682227	-0.804136	0.003638	-0.146812	0.924259	0.705277
YHR044C	DOG1	-1.45119	-1.08954	0.255408	0.113851	1.17482	0.996651
YGR127W	YGR127W	-0.305091	-0.574068	0.033189	-0.239414	0.509035	0.57635
YJL036W	SNX4	-0.22151	-0.664568	0.316792	-0.129673	0.272548	0.426411
YBR035C	PDX3	-0.45486	-0.171699	0.281066	0.122983	0.114511	0.108
YGL207W	SPT16	-0.303361	-0.519817	0.270589	-0.04738	0.219135	0.380834
YFR044C	DUG1	-0.59481	-0.267442	0.27222	0.051792	0.313757	0.224482
YLR460C	YLR460C	-1.06234	-0.702373	-0.201041	0.564978	0.438334	0.962446
YNL294C	RIM21	-0.322484	-0.605966	0.260936	0.090108	0.253845	0.323561
YBR021W	FUR4	-0.796956	-0.833273	0.424213	-0.203687	0.581282	0.828421
YDR005C	MAF1	-0.518943	-0.353862	0.166174	-0.054404	0.193959	0.567076
YGR213C	RTA1	-1.16416	-1.43007	0.104388	-0.102067	1.54891	1.043
YIL072W	HOP1	-0.594172	-1.00746	-0.610042	-0.074444	1.28616	0.999956
YPL160W	CDC60	-0.379446	-0.575729	0.379507	-0.137441	0.204859	0.50825
YHL035C	VMR1	-0.728947	-0.723829	-0.090667	-0.6028	0.921991	1.22425
YDR330W	UBX5	-0.469676	-0.4079	0.375808	-0.380333	0.259672	0.622429
YLR036C	YLR036C	-1.27242	-0.848713	0.127812	0.105834	1.24491	0.642577
YHL028W	WSC4	-0.707772	-1.2215	-0.28184	-0.324463	1.28313	1.25244
YEL011W	GLC3	-0.615249	-0.617038	-0.17823	0.003072	0.745011	0.662434
YDL130W-A	STF1	-1.22428	-1.18205	0.351111	0.42286	0.983103	0.649263
YGL051W	MST27	-0.377382	-0.501161	0.219636	0.219636	0.219636	0.219636
YLR283W	YLR283W	-0.571536	-0.309256	0.289584	-0.325183	0.337748	0.578643
YIL002C	INP51	-0.510781	-0.492541	0.164438	-0.094485	0.370358	0.56301
YJR036C	HUL4	-0.930477	-1.28872	0.572866	0.263203	0.735886	0.647243
YJL026W	RNR2	-0.840402	-0.428162	0.355219	-0.383219	0.623978	0.672586
YKR091W	SRL3	-0.822214	-0.774766	0.33154	0.345676	0.641706	0.278057
YBR056W	YBR056W	-0.412216	-0.495656	0.289407	-0.057113	0.280149	0.395429
YJL016W	YJL016W	-1.39121	-1.4984	0.114504	-0.350249	1.56245	1.5629
YBR087W	RFC5	-0.436468	-0.404511	0.400698	-0.208462	0.183535	0.465208
YDL020C	RPN4	-0.502146	-0.49318	0.219826	-0.217306	0.396332	0.596474
YFR041C	ERJ5	-0.323092	-0.453384	0.377159	0.076666	0.182728	0.139925
YDL085W	NDE2	-1.23223	-0.677941	-0.351608	-0.159963	1.24857	1.17317
YDR379C-A	YDR379C-A	-0.51829	-0.732267	-0.427245	-0.583524	1.19698	1.06434
YNR034W-A	YNR034W-A	-1.10623	-0.715437	-0.263573	0.480613	0.464652	1.13997
YGR161C	RTS3	-0.720578	-0.56861	0.235818	-0.083333	0.68387	0.452834
YBR001C	NTH2	-1.41023	-1.30659	0.052159	-0.041384	1.31673	1.38932
YIR001C	SGN1	-0.579901	-0.30966	0.38391	-0.477292	0.432447	0.550497
YKL029C	MAE1	-0.393576	-0.440261	0.434793	-0.06867	0.197306	0.270408
YBR230W-A	YBR230W-A	-0.880774	-1.00455	-0.244567	0.146642	0.965744	1.01751
YHR030C	SLT2	-0.309188	-0.57611	0.189151	-0.06704	0.444091	0.319095
YPR138C	MEP3	-0.502792	-0.329906	0.237605	-0.075533	0.197889	0.472737
YJR003C	YJR003C	-0.69765	-0.673331	0.48707	-0.196139	0.398132	0.681917
YLR327C	TMA10	-1.08976	-1.07881	0.51544	-0.338235	0.957189	1.03418
YEL071W	DLD3	-0.396124	-0.522822	0.350742	0.02682	0.312748	0.228636
YMR062C	ARG7	-0.577339	-0.682913	-0.0863	0.059025	0.800658	0.486869
YDL234C	GYP7	-0.382654	-0.473266	0.36764	0.020418	0.211004	0.256858
YHR121W	LSM12	-0.600506	-0.264214	0.221359	-0.2502	0.385599	0.507961
YNL032W	SIW14	-0.530413	-0.495763	0.287997	-0.211766	0.421899	0.528046
YBR066C	NRG2	-1.08418	-0.97002	0.745815	-0.092288	0.773107	0.62757
YBR046C	ZTA1	-0.534608	-0.570924	-0.036598	0.24206	0.415882	0.484187
YOR115C	TRS33	-0.540782	-0.356439	0.364612	-0.216973	0.318227	0.431355
YMR076C	PDS5	-0.51109	-0.357439	0.41976	-0.244626	0.129239	0.564156
YJL070C	YJL070C	-0.3526	-0.666901	0.076012	0.146083	0.430463	0.366942
YNL011C	YNL011C	-0.536009	-0.489863	0.079238	-0.272705	0.535139	0.684201
YMR029C	FAR8	-0.334256	-0.566482	0.413832	-0.119967	0.186001	0.420873
YLR092W	SUL2	-1.04345	-0.996138	0.366128	-0.328021	0.939896	1.06158
YDL066W	IDP1	-0.592969	-0.485268	0.190897	-0.239545	0.487313	0.639572
YOL031C	SIL1	-0.423387	-0.384403	0.256656	-0.111976	0.3199	0.343209
YGL044C	RNA15	-0.306203	-0.519249	0.43692	0.096216	0.180252	0.112064
YGR012W	YGR012W	-0.492056	-0.337733	0.40704	-0.023533	0.088361	0.357922
YOR323C	PRO2	-0.280797	-0.422206	0.371162	0.0856	0.131167	0.115074
YKR098C	UBP11	-0.883321	-0.751261	0.736227	-0.022717	0.447687	0.473384
YBR188C	NTC20	-0.938716	-0.759932	0.467372	0.081087	0.606632	0.543557
YNL163C	RIA1	-0.302824	-0.550931	0.471719	-0.042881	0.090521	0.334396
YJL128C	PBS2	-0.420263	-0.440837	0.429079	-0.309154	0.181512	0.559662
YGL059W	PKP2	-0.475325	-0.623767	0.418577	-0.016238	0.416198	0.280555
YJL057C	IKS1	-0.648462	-0.55543	0.264585	-0.131521	0.447321	0.623507
YHR132W-A	IGO2	-0.346677	-0.630921	0.373484	0.088163	0.31181	0.204142
YDR035W	ARO3	-0.371424	-0.454397	0.249925	0.313969	0.101945	0.159982
YJL185C	ATG36	-0.618417	-0.600177	0.099614	-0.21713	0.536555	0.799555
YKR029C	SET3	-0.327346	-0.523881	0.479393	-0.228296	0.29008	0.310051
Cluster_7	Cluster_7	0	0	0	0	0	0
YFL059W	SNZ3	2.75272	2.80826	-1.39024	-1.39024	-1.39024	-1.39024
YPR108W-A	YPR108W-A	1.11205	2.05866	-1.46676	0.184319	-1.33963	-0.548636
YPR201W	ARR3	2.76108	2.75278	-0.665722	-2.822	-1.27853	-0.747601
YPR149W	NCE102	1.92286	2.27384	-1.73671	-2.29353	-0.779206	0.61275
YDR403W	DIT1	2.33075	2.04651	-2.17405	-0.74537	-0.786865	-0.67097
YNL195C	YNL195C	2.0395	1.76007	-0.869455	-1.37366	-0.967693	-0.588764
YDR492W	IZH1	2.00884	2.41843	-1.22575	-1.48059	-1.04292	-0.677999
YLL056C	YLL056C	2.05124	2.05346	-0.787805	-1.0305	-0.718358	-1.56803
YNL334C	SNO2	2.56591	2.0271	-2.49832	-2.6546	0.279957	0.279957
YNL194C	YNL194C	2.72846	2.91588	-1.69834	-1.85462	-1.31116	-0.780222
YGL183C	MND1	2.2392	2.43735	-0.017674	-2.75892	-1.21545	-0.684516
YOR032W-A	YOR032W-A	1.58833	2.61655	-0.838476	-1.99476	-0.451288	-0.920356
YNL120C	YNL120C	1.81143	1.68765	-2.03041	0.286822	0.356782	-2.11229
YKR015C	YKR015C	1.01773	1.01773	-3.11193	1.01773	0.445184	-0.386454
YJL215C	YJL215C	2.81054	2.06528	-1.76826	-1.33958	-0.883992	-0.883992
YAR029W	YAR029W	2.84572	2.96586	-1.45289	-1.45289	-1.45289	-1.45289
YHR001W-A	QCR10	0.834137	1.71036	-1.48189	-0.579019	-1.35748	0.873892
YKL051W	SFK1	3.02182	2.97777	-2.69449	-3.85077	-0.722342	1.26802
YGL184C	STR3	2.3935	2.4895	-1.5233	-2.86401	-0.494571	-0.001113
YMR015C	ERG5	2.4075	2.14217	-0.946988	-1.55073	-1.20366	-0.848295
YAR068W	YAR068W	3.47072	3.7418	-3.54105	-1.22382	-1.22382	-1.22382
YPR194C	OPT2	5.26213	5.35217	-3.04459	-3.78583	-2.24237	-1.54151
Q0080	ATP8	3.01652	2.80528	-1.73573	-1.73573	-0.940632	-1.4097
YBR067C	TIP1	2.13942	2.43633	-0.019325	-1.52924	-1.61965	-1.40753
YHR180W	YHR180W	2.44558	2.92126	-2.85569	-2.01197	0.116459	-0.615642
YCR021C	HSP30	0.760382	1.59353	-2.58396	0.259762	-0.611808	0.582089
YBR296C	PHO89	2.77553	2.62633	-1.99862	-3.1549	0.154099	-0.402431
YLR237W	THI7	2.27963	2.34148	-0.605866	-1.87092	-1.13264	-1.01169
YPR200C	ARR2	2.19823	1.95897	-0.174124	-0.692973	-1.95686	-1.33325
YLR142W	PUT1	2.04701	1.44518	-0.910306	-1.65155	0.061844	-0.992186
YPL136W	YPL136W	2.03155	1.67829	-2.31279	-1.46907	0.881748	-0.809711
YPR195C	YPR195C	3.04893	3.16394	-1.09306	-1.09306	-1.09306	-2.93368
YBL029W	YBL029W	2.38007	2.71572	-0.099204	-2.84045	-0.975051	-1.18108
YJR094C	IME1	2.13326	1.25049	-2.58305	0.89018	-0.610902	-1.07997
YGR249W	MGA1	2.51957	2.48639	-0.585303	-1.32655	-2.10501	-0.989111
YJL196C	ELO1	2.9611	3.19254	-2.47124	-3.03781	-0.55739	-0.087211
YIR019C	FLO11	2.10651	1.25784	-0.759778	-1.6779	-0.354212	-0.572471
YHR033W	YHR033W	2.08878	2.19947	-2.25556	-0.826877	-1.86837	0.662561
YDR317W	HIM1	2.10665	1.39791	-2.73519	-0.891467	0.939158	-0.817067
Cluster_8	Cluster_8	0	0	0	0	0	0
YGR087C	PDC6	1.33244	1.86074	-1.73179	-1.88807	0.655396	-0.228709
YML126C	ERG13	0.445763	0.349913	-0.019322	-0.355959	-0.14876	-0.271635
YPR204W	YPR204W	0.410643	0.410643	-0.491896	-1.15068	0.410643	0.410643
YIL015W	BAR1	0.755547	0.962973	-0.285602	-1.80445	0.323978	0.047556
YGR106C	VOA1	0.280082	0.552202	-0.273293	-0.540748	-0.011059	-0.007184
YLR083C	EMP70	0.371359	0.601382	-0.203518	-0.70422	-0.173692	0.10869
YKL004W	AUR1	0.215532	0.540606	0.015908	-0.700416	-0.067163	-0.004466
YJL089W	SIP4	1.46029	0.42578	-0.766212	-0.700099	-0.156632	-0.263129
YEL068C	YEL068C	0.758036	0.71435	-0.363405	-0.773441	-0.175526	-0.160015
YBR016W	YBR016W	0.520053	0.934744	-0.540372	-0.707338	-0.132045	-0.075043
YDR284C	DPP1	0.554289	0.542019	-0.59108	-0.712026	0.057154	0.149644
YNL083W	SAL1	0.492649	0.468405	-0.249656	-0.6404	-0.014471	-0.056528
YNL234W	YNL234W	0.612809	0.75651	-1.15103	-1.16292	0.542821	0.401807
YFR022W	ROG3	0.531618	0.482726	-0.690213	-0.954296	0.323648	0.306517
YPR113W	PIS1	0.381257	0.284687	-0.212174	-0.598021	0.17005	-0.025798
YLR084C	RAX2	0.372915	0.369118	-0.127579	-0.652835	-0.113359	0.151739
YGR146C	ECL1	0.245309	0.283801	-0.177579	-0.866981	0.149738	0.365712
YLR297W	YLR297W	0.863147	0.823842	-1.09962	-1.29182	0.316835	0.387611
YFL055W	AGP3	0.94866	0.831336	-0.7168	-0.979994	-0.214134	0.130932
YKL060C	FBA1	0.215605	0.214114	-0.292307	-0.604732	0.164925	0.302395
YDR044W	HEM13	0.315901	0.30527	-0.255944	-0.441756	0.048505	0.028024
YIL029C	YIL029C	1.54702	1.21679	-0.616748	-1.18806	-0.479499	-0.479499
YHR092C	HXT4	1.27854	1.12028	-1.96702	-1.0789	0.253059	0.394045
YLR342W	FKS1	0.444394	0.358109	0.027159	-0.576753	-0.263195	0.010286
YOL165C	AAD15	1.83572	1.15555	-1.91771	-1.91771	-0.218396	1.06256
YCR089W	FIG2	0.70693	0.502884	0.076285	-0.994602	-0.358803	0.067307
YDL012C	YDL012C	0.324123	0.409209	-0.203057	-0.606718	0.027262	0.049181
YOR071C	NRT1	0.868799	0.784332	-0.133037	-1.18622	-0.196956	-0.136914
YFR057W	YFR057W	1.33369	1.45784	-0.697882	-0.697882	-0.697882	-0.697882
YOL002C	IZH2	0.594139	0.811581	-0.674658	-0.739767	0.074375	-0.06567
YOR311C	DGK1	0.191442	0.556832	-0.475237	-0.801441	0.27916	0.249243
YLR203C	MSS51	0.234321	0.29992	-0.45643	-0.581307	0.224907	0.278588
YMR116C	ASC1	0.05944	0.318872	-0.134243	-0.700375	0.176627	0.279679
YDR454C	GUK1	0.449236	0.625966	-0.296413	-0.487198	-0.085825	-0.205765
YGL157W	ARI1	0.705268	0.609221	-1.00469	-1.22328	0.420328	0.493155
YGL186C	TPN1	0.242851	0.445761	-0.289034	-0.320985	-0.094491	0.015898
YNL214W	PEX17	0.451304	0.557823	-0.698658	-0.639925	0.109994	0.219462
YBR078W	ECM33	0.594409	0.697413	0.107577	-0.864623	-0.383429	-0.151348
YGR038W	ORM1	0.481909	0.746902	-0.619994	-1.11838	0.241126	0.268435
YNL288W	CAF40	0.259165	0.379359	-0.125389	-0.571175	-0.05662	0.11466
YMR281W	GPI12	0.215162	0.569615	-0.398146	-0.669137	0.007304	0.275202
YOL081W	IRA2	0.530014	0.207706	-0.0473	-0.879284	-0.090289	0.279153
YNL190W	YNL190W	0.252311	0.515378	-0.146041	-0.962128	-0.028323	0.368804
YFL021W	GAT1	0.335857	0.164098	-0.253097	-0.807539	0.404181	0.1565
YHR048W	YHK8	0.800075	1.03043	-0.331654	-1.07711	-0.327612	-0.094131
YLR375W	STP3	0.397403	0.717372	-0.306275	-0.840737	0.14533	-0.113093
YJR150C	DAN1	0.672661	0.68848	-0.264113	-1.04856	-0.112188	0.063716
YMR110C	HFD1	0.35784	0.374319	-0.25051	-0.509882	-0.020863	0.049096
YDR105C	TMS1	0.281844	0.45667	-0.389344	-0.505466	0.066016	0.09028
YLR010C	TEN1	1.37255	1.34324	-0.730152	-1.45203	-0.267015	-0.266598
YKL044W	YKL044W	1.05239	1.30207	-0.493997	-1.01285	-0.189271	-0.658339
YJL183W	MNN11	0.385505	0.361171	-0.212049	-0.385585	-0.036997	-0.112045
YOR129C	AFI1	0.488344	0.322745	-0.17535	-0.320741	-0.2032	-0.111799
YDR126W	SWF1	0.501748	0.528835	-0.55399	-1.11873	0.119107	0.523034
YIR028W	DAL4	0.870316	1.23196	-0.329979	-0.601735	-0.058268	-1.1123
YNL241C	ZWF1	0.495541	0.496495	-0.085887	-0.343781	-0.153645	-0.408722
YEL038W	UTR4	0.900202	0.634044	-0.669939	-0.558871	-0.015404	-0.290033
YKR052C	MRS4	0.258527	0.251787	-0.265455	-0.796582	0.250318	0.301405
YDL016C	YDL016C	0.310928	0.40438	-0.166339	-0.642797	0.034194	0.059634
YAL009W	SPO7	0.36088	0.38849	-0.337886	-0.444978	0.074105	-0.040612
YOL106W	YOL106W	0.482303	0.998348	-0.741408	-0.772156	0.186349	-0.153436
YDR214W	AHA1	0.502138	0.503967	-0.23923	-0.581425	-0.144758	-0.040693
YMR085W	YMR085W	0.570156	0.588396	-0.374778	-1.53106	0.164413	0.582871
YGR101W	PCP1	0.371123	0.717025	-0.434059	-0.466532	-0.121144	-0.066413
YLR452C	SST2	0.563257	0.52694	-0.324387	-1.11294	0.248156	0.098969
YOL155C	HPF1	0.549088	0.306318	-0.344029	-1.22831	0.21091	0.506019
YNR028W	CPR8	0.232143	0.338122	-0.422643	-0.610219	0.250106	0.212492
YIL043C	CBR1	0.488387	0.526788	-0.592318	-0.655456	0.183977	0.048622
YKL187C	FAT3	0.985102	1.22105	-0.770027	-0.341343	-0.347215	-0.747569
YMR055C	BUB2	0.563764	0.763987	-0.526653	-1.08569	0.189843	0.09475
YMR181C	YMR181C	0.315067	0.349524	-0.500813	-0.993191	0.272175	0.557238
YIL014W	MNT3	0.466945	0.408457	-0.473358	-0.656706	0.123138	0.131523
YOR079C	ATX2	0.557043	0.668368	-0.662032	-0.989792	0.189103	0.237311
YLR214W	FRE1	0.756527	0.613252	-0.195957	-1.04291	-0.084403	-0.046511
YAL012W	CYS3	0.413285	0.445209	-0.001963	-0.585191	0.003529	-0.27487
YGR086C	PIL1	0.358366	0.298731	-0.07054	-0.906154	-0.090366	0.409963
YNL333W	SNZ2	0.305929	0.530073	-0.209001	-0.209001	-0.209001	-0.209001
YGR082W	TOM20	0.39075	0.44515	-0.513375	-0.677632	0.182955	0.172152
YHR042W	NCP1	1.0183	0.88873	-0.260831	-0.885494	-0.395987	-0.364719
YGL160W	AIM14	0.327113	0.875972	-0.400085	-0.749009	-0.106006	0.052015
YJL004C	SYS1	0.466142	0.451592	-0.493879	-0.393	-0.080539	0.049683
YJL171C	YJL171C	0.655237	0.863237	-0.548501	-0.657913	-0.103508	-0.208553
YGR286C	BIO2	0.394381	0.470211	-0.120699	-0.79028	-0.113359	0.159745
YGR138C	TPO2	1.65061	1.96072	-2.02413	-2.72097	0.471588	0.66218
YJL002C	OST1	0.189222	0.403371	-0.322425	-0.605082	0.143439	0.191476
YJL198W	PHO90	0.429281	0.351187	-0.030699	-0.971613	0.027181	0.194663
YGL053W	PRM8	1.19273	0.943417	0.223083	-2.80539	0.223083	0.223083
YDL241W	YDL241W	1.11416	1.40542	-1.31265	-1.53604	0.074543	0.254568
YDR034W-B	YDR034W-B	1.81045	1.03459	-1.90586	-2.06214	0.940762	0.182188
YPL036W	PMA2	0.832324	0.91422	-0.886897	-1.10876	-0.084671	0.333787
YDR025W	RPS11A	0.024338	0.314755	-0.283148	-0.824748	0.375427	0.393376
YGL225W	VRG4	0.410541	0.843885	-0.433869	-0.881752	-0.009448	0.070642
YNL283C	WSC2	0.285164	0.602742	-0.088123	-0.481008	-0.152809	-0.165967
YDR502C	SAM2	0.817373	0.679828	-0.362739	-0.666257	-0.077702	-0.390504
YDR273W	DON1	0.835624	0.319528	-0.006216	-0.882387	-0.178455	-0.088095
YBR068C	BAP2	0.361189	0.585469	-0.185336	-0.465316	-0.279243	-0.016762
YBR242W	YBR242W	0.837442	0.574686	-0.36172	-0.832873	-0.032248	-0.185288
YMR002W	MIC17	0.410944	0.314999	-0.454508	-0.661669	0.101017	0.289217
YDR506C	GMC1	0.435562	0.420718	-0.849885	-0.743129	0.102901	0.633833
YDR438W	THI74	0.373902	0.360767	-0.072637	-0.639984	-0.128578	0.10653
YML018C	YML018C	0.459338	0.552841	-0.250713	-0.972272	0.040898	0.169908
YCR044C	PER1	0.526707	0.640661	-0.566438	-0.764194	0.076954	0.08631
YDR276C	PMP3	0.812918	1.19946	-1.45613	-1.66217	0.532226	0.573696
YOR349W	CIN1	0.699883	0.699031	-0.218516	-0.898014	-0.219195	-0.063189
YNL307C	MCK1	0.400299	0.59532	-0.300255	-0.65628	-0.043974	0.004889
YMR236W	TAF9	0.428872	0.317993	-0.329067	-0.613102	0.28922	-0.093917
YOR247W	SRL1	0.130475	0.488095	-0.166713	-0.585686	0.011926	0.121904
YNR060W	FRE4	0.805331	1.03665	-0.520259	-0.989697	-0.205221	-0.126801
YML028W	TSA1	0.178322	0.285622	-0.370278	-0.710114	0.367946	0.248501
YMR079W	SEC14	0.236891	0.363729	-0.243812	-0.587794	0.12825	0.102735
YNL080C	EOS1	0.379454	0.442724	-0.250166	-0.626571	-0.047867	0.102426
YAL044W-A	YAL044W-A	0.406279	0.499039	-0.29912	-0.633317	-0.010899	0.038018
YLR450W	HMG2	0.224839	0.353754	-0.17383	-0.767212	0.025855	0.336595
YDR414C	ERD1	0.413355	0.801586	-0.374037	-0.632497	-0.115747	-0.092661
YHL042W	YHL042W	1.71812	1.72636	-1.7022	-2.51055	0.345655	0.422619
YOR306C	MCH5	0.868946	0.666557	-0.282579	-0.860685	-0.067858	-0.324381
YHL043W	ECM34	1.58615	1.7046	-1.5962	-1.96821	0.190921	0.082735
YJR013W	GPI14	0.263956	0.471908	-0.435545	-0.671994	0.114744	0.256931
YLR432W	IMD3	0.362061	0.359742	-0.154603	-0.981588	0.024222	0.390166
YCL002C	YCL002C	0.480869	0.779863	-0.516425	-0.655529	-0.078313	-0.010465
YPR147C	YPR147C	0.431695	0.685409	-0.4075	-0.501718	-0.144402	-0.063483
YDR352W	YPQ2	0.641891	0.588995	-0.282717	-0.730336	-0.156915	-0.060919
YDL048C	STP4	0.655326	0.722689	-0.836017	-1.02086	0.236298	0.242569
YPR016C	TIF6	0.520524	0.552229	-0.432347	-0.76736	-0.006784	0.133739
YNL070W	TOM7	0.283524	0.716002	-0.594579	-0.856967	0.158963	0.293056
YCR048W	ARE1	0.487778	0.507713	-0.101016	-0.359953	-0.061613	-0.472908
YJR075W	HOC1	0.633416	0.55245	-0.130605	-0.597126	-0.296617	-0.161518
YCL038C	ATG22	0.416539	0.62975	-0.425842	-0.806408	0.05405	0.13191
YLR004C	THI73	0.759499	0.87388	-0.534853	-1.23862	0.276833	-0.136739
YDR140W	MTQ2	0.504309	0.442193	-0.362954	-0.3905	0.004869	-0.197918
YAL064C-A	TDA8	0.381173	-0.742606	0.090358	0.090358	0.090358	0.090358
YJR044C	VPS55	0.298313	0.424053	-0.363549	-0.657064	0.158712	0.139535
YGR155W	CYS4	0.462661	0.368498	-0.275235	-0.752125	-0.021339	0.21754
YMR010W	YMR010W	0.231939	0.409889	-0.234211	-0.461326	-0.03236	0.086068
YHL017W	YHL017W	0.199968	0.237497	-0.22866	-0.677187	0.214922	0.253459
YEL046C	GLY1	0.394282	0.404898	-0.056217	-0.63624	-0.056309	-0.050414
YEL017W	GTT3	0.51447	0.599523	-0.307086	-0.459593	-0.017546	-0.329769
YDL090C	RAM1	0.27339	0.373283	-0.280981	-0.885721	0.272456	0.247573
YLR426W	TDA5	0.392094	0.33567	-0.25876	-0.46467	0.093153	-0.097488
YDL015C	TSC13	0.315174	0.605207	-0.471402	-0.671965	0.044261	0.178725
YEL017C-A	PMP2	0.961398	1.37854	-0.826493	-1.41849	0.050746	-0.145701
YJR061W	YJR061W	0.763747	0.166037	-0.552024	-0.900948	0.250201	0.272987
YLR164W	SHH4	0.516164	0.699046	-0.08175	-0.685489	-0.077891	-0.370081
YER010C	YER010C	0.39676	0.682151	-0.155361	-0.475829	-0.139804	-0.307917
YIL145C	PAN6	0.263468	0.393638	-0.389606	-0.616889	0.113489	0.235901
YEL062W	NPR2	0.356282	0.177594	-0.191434	-0.77994	0.128292	0.309206
YMR086W	SEG1	0.597593	0.389421	-0.124363	-0.980375	-0.003608	0.121332
YJL097W	PHS1	0.530542	0.770304	-0.452071	-1.07843	0.072094	0.15756
YGL154C	LYS5	0.632136	0.516484	-0.666083	-0.590415	0.152822	-0.044944
YBR010W	HHT1	0.217622	0.752103	-0.222595	-0.577917	-0.080046	-0.089167
YNR030W	ALG12	0.14546	0.358513	-0.21608	-0.755079	0.141033	0.326153
YIL089W	YIL089W	1.06014	0.936364	-1.63731	-1.14151	0.264455	0.517853
YJL059W	YHC3	0.537016	0.495699	-0.791023	-0.764824	0.249715	0.273416
YBR008C	FLR1	0.388475	0.441315	0.027261	-0.685412	-0.131375	-0.040263
YLR372W	SUR4	0.325704	0.458289	-0.262499	-0.894764	0.141193	0.232076
YOR005C	DNL4	0.606597	0.308905	-0.094434	-0.820278	0.028481	-0.029272
YMR148W	OSW5	0.097936	0.368436	-0.393407	-0.716583	0.143358	0.500261
YOR381W	FRE3	0.456803	0.262634	-0.637803	-0.956354	0.194796	0.679925
YBR105C	VID24	0.579453	0.447659	-0.747015	-0.920168	0.348335	0.291736
YDR490C	PKH1	1.19318	1.16686	-0.180968	-0.926871	-0.681887	-0.570305
YLL057C	JLP1	1.01914	1.05582	-1.3252	-0.311556	-0.938014	0.499809
YLR367W	RPS22B	0.024843	0.414079	-0.485384	-0.612264	0.314798	0.343928
YPL014W	YPL014W	0.036164	0.340558	-0.330338	-0.860076	0.337702	0.475991
YPL172C	COX10	0.911778	0.765729	-0.689297	-0.988702	-0.012603	0.013095
YFL050C	ALR2	0.622488	0.051962	-0.337773	-0.871288	0.348177	0.186434
YJL143W	TIM17	0.394739	0.679739	-1.02273	-0.435538	0.217621	0.166165
YJL145W	SFH5	0.504391	0.282598	-0.083922	-0.596822	-0.068703	-0.037541
YCR105W	ADH7	0.560399	0.861505	-0.582523	-0.9133	0.008679	0.06524
YLR191W	PEX13	0.38118	0.695898	-0.472534	-0.460214	0.007018	-0.151348
YEL074W	YEL074W	0.096911	0.096911	1.46928	-1.85692	0.096911	0.096911
YJL062W	LAS21	0.276969	0.33795	-0.244622	-0.727455	0.082552	0.274606
YMR154C	RIM13	0.563911	0.309965	-0.219715	-0.745567	0.06619	0.025216
YGR067C	YGR067C	1.40448	1.46127	-1.75929	-1.91557	-0.050172	0.859273
YBR072W	HSP26	1.51315	1.19412	-0.877582	-0.955859	-0.136757	-0.737069
YMR208W	ERG12	0.560016	0.561852	-0.194361	-0.403946	-0.321746	-0.201815
YGR062C	COX18	0.28914	0.440995	-0.353169	-0.842691	0.129944	0.335781
YDR380W	ARO10	1.13551	1.05706	-0.354026	-0.662308	-0.703804	-0.472431
YKR065C	PAM17	0.240285	0.49728	-0.401202	-0.655553	0.19107	0.12812
YGR091W	PRP31	0.814568	0.431813	-0.165792	-0.975747	-0.103331	-0.001511
YFR020W	YFR020W	1.3171	1.34231	-1.48309	-1.269	0.080526	0.012153
YER093C-A	AIM11	0.459979	0.429309	-0.437003	-0.772606	0.175252	0.145069
YHR004C	NEM1	0.368195	0.319664	0.009148	-0.659337	-0.043143	0.005473
YOR101W	RAS1	0.675812	0.639185	-0.119234	-0.818874	-0.355897	-0.020992
YAL064W-B	YAL064W-B	-0.298025	0.993234	-0.173802	-0.173802	-0.173802	-0.173802
YBR086C	IST2	0.28241	0.308424	-0.536518	-1.02619	0.206702	0.765168
YHL036W	MUP3	0.129544	0.524057	-0.274175	-0.81827	0.123282	0.315563
YHR032W-A	YHR032W-A	0.696344	0.802862	0.131344	-1.02494	-0.350224	-0.25539
YDL236W	PHO13	0.441781	0.47259	-0.446569	-0.254044	-0.109566	-0.104192
YBR089C-A	NHP6B	0.652913	0.370705	-0.312361	-1.17144	0.235292	0.224889
YCR012W	PGK1	0.249082	0.397771	-0.451507	-0.470307	0.341607	-0.066647
YGL012W	ERG4	0.503855	0.662838	-0.910612	-0.8431	0.362323	0.224695
YGL114W	YGL114W	0.335681	0.358744	-0.336234	-0.433619	0.046654	0.028773
YOL086C	ADH1	0.32011	0.468834	-0.185001	-0.548745	0.336328	-0.391527
YDR134C	YDR134C	1.11928	1.20701	-1.80056	-2.21987	0.461099	1.23304
YLR047C	FRE8	0.343727	0.356311	-0.185751	-0.86616	0.03454	0.317333
YJR062C	NTA1	0.367808	0.382226	-0.152104	-0.585224	-0.041756	0.029051
YOR016C	ERP4	0.367309	0.365521	-0.198589	-0.445254	-0.025058	-0.063928
YMR161W	HLJ1	0.426303	0.484827	-0.193565	-0.773744	0.062919	-0.006741
YER177W	BMH1	0.233445	0.167434	-0.271445	-0.6611	0.255802	0.275864
YLL015W	BPT1	0.39381	0.28826	-0.092685	-0.512921	-0.162626	0.086163
YLR437C	DIF1	0.399625	0.490224	-0.197701	-0.399423	-0.031664	-0.26106
YLL014W	EMC6	0.62958	0.568733	-0.70598	-0.624241	0.193191	-0.061283
YER044C	ERG28	0.606186	0.668833	-0.319453	-0.755315	-0.16394	-0.036312
YGR004W	PEX31	0.552133	0.482801	-0.489955	-0.561464	0.12022	-0.103735
YPR140W	TAZ1	0.374762	0.685703	-0.717485	-0.961227	0.389596	0.22865
YPL058C	PDR12	1.13475	0.942332	-0.16095	-0.841202	-0.566437	-0.50849
YDR487C	RIB3	0.294554	0.299496	-0.081156	-0.233379	-0.107314	-0.172201
YGL263W	COS12	1.11815	1.12086	-1.55568	-1.07672	0.109808	0.283584
YLR091W	GEP5	0.459787	0.430867	-0.198189	-0.411052	-0.142207	-0.139206
YHR219W	YHR219W	0.306828	0.306828	0.5653	-1.79261	0.306828	0.306828
YDL142C	CRD1	0.275482	0.294307	-0.15015	-1.10068	0.338678	0.342364
YJR098C	YJR098C	0.700217	0.478406	-0.588604	-0.702448	0.107535	0.004895
YIR030W-A	YIR030W-A	1.04642	-0.884709	-0.040429	-0.040429	-0.040429	-0.040429
YMR155W	YMR155W	0.239474	0.421799	-0.57637	-0.633114	0.212916	0.335295
YLL049W	LDB18	0.623004	0.947321	-0.784815	-0.671005	0.084766	-0.19927
YOR360C	PDE2	0.279078	0.516046	-0.29768	-1.04405	0.061962	0.484641
YNL065W	AQR1	0.382574	0.469783	-0.339426	-0.86952	0.016053	0.340535
YEL025C	YEL025C	0.359344	0.189503	-0.485166	-0.661623	0.175041	0.422901
YER140W	EMP65	0.371951	0.460832	-0.260895	-0.850684	-0.024487	0.303283
YPL095C	EEB1	1.34265	1.43489	-0.903983	-1.29633	-0.463355	-0.11387
YAL068W-A	YAL068W-A	-0.330125	1.13106	-0.200234	-0.200234	-0.200234	-0.200234
YNL231C	PDR16	0.605026	0.460636	-0.433851	-0.757858	0.02205	0.103997
YGR192C	TDH3	0.596606	0.720984	-0.68199	-1.11802	0.332828	0.149593
YLR390W-A	CCW14	0.287011	0.416802	0.152166	-0.748804	-0.021493	-0.085681
YMR189W	GCV2	1.35987	1.21439	-1.17748	-1.89101	-0.118007	0.612235
YKL207W	EMC3	0.162046	0.459642	-0.447503	-0.492119	0.222502	0.095432
YKL068W-A	YKL068W-A	0.262178	0.517938	-0.50166	-0.677048	0.230058	0.168534
YJR104C	SOD1	0.291103	0.281261	-0.428289	-0.555167	0.31106	0.100032
YPR063C	YPR063C	0.308763	0.469119	-0.333177	-0.647718	0.047752	0.15526
YGR244C	LSC2	0.352757	0.164158	-0.507806	-0.772774	0.406671	0.356994
YLR173W	YLR173W	0.352809	0.106258	-0.269353	-0.693565	0.261992	0.241858
YHR160C	PEX18	0.625451	1.26066	-1.7469	-1.48815	0.514753	0.834182
YML052W	SUR7	1.59707	1.76728	-1.26467	-1.90158	-0.252993	0.054897
YPR121W	THI22	0.606311	0.681311	-0.065605	-1.01835	-0.230958	0.027291
YOR008C-A	YOR008C-A	1.23463	1.46699	-1.34418	-1.82239	0.043009	0.421939
YCR024C-B	YCR024C-B	0.428366	0.555717	-0.244506	-1.21272	0.018311	0.454835
YMR145C	NDE1	0.966799	0.328447	-1.02704	-1.03132	0.64965	0.113469
YDR047W	HEM12	0.338249	0.604623	-0.743318	-0.551277	0.189459	0.162264
YLR050C	YLR050C	0.494833	0.303089	-0.10002	-0.438379	0.026068	-0.285591
YIL088C	AVT7	0.353069	0.617832	-0.606186	-0.64419	0.173453	0.106022
YPR114W	YPR114W	0.521831	0.717251	-0.233677	-0.643048	-0.107254	-0.255103
YLL023C	POM33	0.471003	0.674969	-0.125213	-0.920459	-0.016816	-0.083483
YPR020W	ATP20	0.439694	0.617084	-0.132686	-0.922837	0.120201	-0.121456
YMR003W	AIM34	0.821897	0.845963	-0.250141	-0.955313	-0.235996	-0.22641
YKL056C	TMA19	0.362819	0.502654	-0.130693	-0.611597	-0.002355	-0.120829
YDR349C	YPS7	0.429649	0.418668	-0.242598	-0.57046	-0.141972	0.106713
YLR411W	CTR3	0.955903	0.832124	-1.71601	-0.404733	0.256139	0.076578
YKL035W	UGP1	0.216451	0.200168	-0.396856	-0.721053	0.317289	0.384
YPL274W	SAM3	1.45274	1.46923	-0.552531	-1.41	-0.511621	-0.447814
YGR224W	AZR1	0.967446	0.921669	-0.874394	-0.445711	-0.487206	-0.081804
YDL165W	CDC36	0.47742	0.510787	-0.272922	-0.773466	0.014155	0.044026
YLR413W	YLR413W	0.480807	0.690722	-0.3048	-1.10522	-0.096107	0.334599
YOR378W	YOR378W	0.866997	0.613934	-0.197236	-1.21601	0.726005	-0.793688
YGR209C	TRX2	0.159581	0.48849	-0.166065	-0.742021	0.138802	0.121212
YLR231C	BNA5	1.35805	1.2173	-1.43403	-1.42856	0.210063	0.077178
YPL229W	YPL229W	0.241018	0.472333	-0.487928	-0.897964	0.468625	0.203916
YGR159C	NSR1	0.277847	0.325216	-0.059227	-0.693	-0.050357	0.199522
YGL040C	HEM2	0.667298	0.56154	-0.41555	-0.550134	-0.170115	-0.093039
YBR175W	SWD3	0.636004	0.671348	-0.381827	-0.599883	-0.092941	-0.232701
YMR292W	GOT1	0.189321	0.930105	-0.699825	-0.921693	0.404963	0.09713
YKL094W	YJU3	0.55203	0.445801	-0.239292	-0.835392	-0.064004	0.140857
YDR100W	TVP15	0.231969	0.438338	-0.510336	-0.569004	0.244224	0.164808
YOL020W	TAT2	0.350096	0.417569	0.036432	-0.67872	-0.109119	-0.016258
YOR020C	HSP10	0.160349	0.401304	-0.342508	-0.614265	0.264806	0.130314
YIL041W	GVP36	0.224139	0.442946	-0.225664	-0.589085	-0.00728	0.154944
YBL002W	HTB2	0.45344	0.788758	-0.357478	-0.648204	-0.142766	-0.093749
YIL040W	APQ12	0.590696	0.811793	-0.335756	-1.03878	-0.179052	0.151098
YER043C	SAH1	0.383189	0.335218	-0.223138	-0.831113	0.118643	0.2172
YMR136W	GAT2	0.257085	0.339507	-0.171127	-0.73541	0.087835	0.222109
YHR050W	SMF2	0.571649	0.693951	-0.190203	-0.582975	-0.276628	-0.215793
YDR513W	GRX2	0.389039	0.785832	-0.902604	-0.70219	0.225064	0.204859
YFR054C	YFR054C	0.769952	1.42378	-0.294281	-2.45056	0.275554	0.275554
YPL183W-A	RTC6	0.299187	0.648415	-0.557153	-0.636811	0.143193	0.10317
YDR119W	VBA4	0.186939	0.390103	-0.256201	-0.582405	0.015924	0.245639
YAR066W	YAR066W	-0.087637	-0.087637	-1.15248	-0.087637	1.23471	0.18068
YER048W-A	ISD11	0.248075	0.635797	-0.501615	-0.426888	0.16008	-0.115449
YOR045W	TOM6	0.134054	0.61502	-0.157381	-0.731616	0.229807	-0.089883
YNL263C	YIF1	0.140964	0.536919	-0.460316	-0.884562	0.249128	0.417866
YER141W	COX15	0.841004	0.928729	-1.1663	-0.41569	-0.116149	-0.071592
YML075C	HMG1	1.18275	1.1296	-0.741255	-1.16692	-0.386128	-0.018046
YOL137W	BSC6	0.559328	0.566218	-0.890825	-1.07769	0.313771	0.529202
YGL054C	ERV14	0.417302	0.715292	-0.361581	-0.61974	-0.108621	-0.042652
YGR227W	DIE2	0.563146	0.780793	-0.574698	-0.889437	-0.107892	0.228088
YAL063C	FLO9	1.78651	1.16091	-0.478539	-1.28689	-0.590995	-0.590995
YNL066W	SUN4	0.992659	1.07078	-0.314821	-1.00882	-0.607515	-0.132275
YOL061W	PRS5	0.294916	0.320681	-0.258072	-0.570173	0.070742	0.141905
YHR101C	BIG1	0.361034	0.559183	-0.617308	-0.476093	0.171085	0.002099
YDR270W	CCC2	0.560608	0.356659	-0.998832	-0.669685	0.65139	0.099861
YJR135W-A	TIM8	0.338092	1.00309	-0.422633	-0.689943	0.024365	-0.252973
YGL255W	ZRT1	1.50019	1.60786	-0.222829	-1.12535	-1.07665	-0.68322
YCR028C	FEN2	0.477328	0.600189	-0.549492	-0.536773	-0.023285	0.032032
YLR180W	SAM1	0.579188	0.660595	-0.158619	-0.896968	-0.088404	-0.095793
YMR209C	YMR209C	0.588379	0.624194	-0.482486	-0.741213	-0.066501	0.077628
YDR367W	KEI1	0.367818	0.65015	-0.434776	-0.656715	0.108688	-0.035164
YKR042W	UTH1	0.751295	0.731688	0.08647	-0.990914	-0.292679	-0.28586
YGR290W	YGR290W	0.287098	0.287098	0.907622	-2.05601	0.287098	0.287098
YDR501W	PLM2	0.708255	0.784414	-0.331811	-0.704902	-0.370888	-0.085068
YLR001C	YLR001C	0.329897	0.210302	-0.284969	-0.714342	0.134083	0.325029
YMR008C	PLB1	0.766285	0.763151	-0.525144	-1.12471	0.042146	0.078274
YBR238C	YBR238C	0.704155	0.687419	-0.159353	-1.03692	-0.298743	0.103439
YNR056C	BIO5	1.13945	1.21271	-0.890019	-1.63126	-0.180903	0.35003
YKL107W	YKL107W	1.82472	1.51652	-0.754084	-2.23229	-0.366896	0.012033
YLR459W	GAB1	0.315742	0.554318	-0.122223	-0.895613	-0.111137	0.258912
YIL166C	YIL166C	1.90243	1.98274	-1.32644	-2.09569	-0.354285	-0.108755
YGR247W	CPD1	0.523729	0.679332	-0.263664	-0.474391	-0.171931	-0.293075
YDL054C	MCH1	0.224446	0.433242	-0.196358	-0.438978	-0.107349	0.084998
YMR023C	MSS1	0.828426	0.686556	-0.432953	-0.845071	0.007346	-0.244304
YKL106W	AAT1	0.675738	0.666471	-0.441736	-0.859532	-0.050757	0.009816
YLR209C	PNP1	0.364379	0.498334	-0.428904	-0.220909	-0.001358	-0.211543
YNL130C	CPT1	0.453115	0.559754	-0.243228	-0.823801	-0.018786	0.072946
YHR189W	PTH1	1.02404	0.285551	-0.525619	-0.681898	0.183497	-0.28557
YBL069W	AST1	0.334901	0.615964	-0.290364	-0.357638	0.122819	-0.425682
YOR286W	RDL2	0.357964	0.459745	-0.121676	-0.706002	-0.013671	0.02364
YDL052C	SLC1	0.519501	0.605842	-0.441985	-0.527073	0.034096	-0.190381
YMR184W	ADD37	0.25431	0.387126	0.008403	-0.312687	-0.086561	-0.250592
YML019W	OST6	0.58301	0.744134	-0.587091	-0.914211	-0.0146	0.188758
YBR265W	TSC10	0.257361	0.353039	-0.120135	-0.311328	-0.082532	-0.096404
YMR274C	RCE1	0.451241	0.445459	-0.265068	-0.734847	0.155543	-0.052327
YLR034C	SMF3	0.129182	0.318267	-0.402221	-0.678081	0.182159	0.450693
YLR395C	COX8	0.412224	0.822782	-0.493181	-1.33535	0.269516	0.324011
YLR118C	YLR118C	0.339459	0.551787	-0.475909	-0.424863	-0.06918	0.078705
YNR036C	MRPS12	0.457742	0.690465	-0.451622	-0.394554	-0.046513	-0.255517
YCR010C	ADY2	1.20625	1.08247	-0.372555	-1.1138	-0.570329	-0.232042
YOR356W	CIR2	0.289408	0.708156	-0.683677	-1.18788	0.540013	0.33398
YBR230C	OM14	0.722466	0.539793	-0.593305	-1.16462	0.296383	0.199285
YBL045C	COR1	0.388992	0.440472	-0.373896	-0.673667	-0.168419	0.386519
YBR207W	FTH1	0.281912	0.35022	-0.496574	-0.646456	0.195774	0.315124
YLR056W	ERG3	0.894932	0.905537	-0.868785	-0.820292	-0.157884	0.046491
YER009W	NTF2	0.339903	0.377054	-0.300739	-0.460866	0.115365	-0.070717
YIL087C	AIM19	0.250382	0.657728	-0.022437	-0.670569	-0.196364	-0.01874
YHR181W	SVP26	0.451262	0.77772	-0.577771	-0.87096	0.103773	0.115977
YPR127W	YPR127W	1.287	0.959007	-1.00582	-1.03547	0.088917	-0.293641
YKL175W	ZRT3	0.353192	0.418936	-0.172308	-0.760221	-0.039692	0.200092
YCR106W	RDS1	0.419972	0.261913	-0.151877	-0.644408	0.053251	0.061149
YOL101C	IZH4	0.353901	0.606695	-0.333252	-0.576677	-0.043467	-0.0072
YJL212C	OPT1	1.02756	1.04975	-0.559176	-1.47418	-0.153106	0.109154
YLR110C	CCW12	0.725489	1.17038	-0.622165	-1.31492	0.01042	0.030801
YGL204C	YGL204C	1.03056	0.968181	-1.16492	-1.0988	0.09674	0.168241
YGR037C	ACB1	0.260854	0.570099	-0.444141	-0.730417	0.144562	0.199044
YPR182W	SMX3	0.524647	0.199661	-0.196472	-0.609909	0.172941	-0.090868
YFL037W	TUB2	0.445382	0.438513	-0.024462	-0.316037	-0.202448	-0.340947
YDR384C	ATO3	1.30291	1.46774	-0.706388	-1.30007	-0.275479	-0.488707
YLR174W	IDP2	0.322733	0.380793	-0.573969	-1.11212	0.55688	0.425682
YKR088C	TVP38	0.203662	0.468845	-0.352776	-0.734157	0.148848	0.265577
YGL224C	SDT1	0.378179	0.34507	-0.255262	-0.50027	-0.045612	0.077896
YBR118W	TEF2	1.36067	1.23296	-1.51795	-2.15122	0.603941	0.471606
YPR028W	YOP1	0.140006	0.382714	-0.471062	-0.809611	0.378395	0.379559
YOR389W	YOR389W	1.49599	0.987544	-1.73052	-1.47176	0.53114	0.187604
YBR246W	RRT2	0.36492	0.369906	-0.288977	-0.544061	0.021155	0.077057
YGL008C	PMA1	0.748216	0.786428	-0.390937	-1.01834	-0.167897	0.042526
YHR175W	CTR2	0.36877	0.430857	-0.806314	-0.500067	0.228814	0.27794
YHR078W	YHR078W	0.691521	0.588001	-0.550857	-0.796403	0.015205	0.052532
YJL163C	YJL163C	0.542724	0.565494	-0.960947	-0.973862	0.465187	0.361404
YHR026W	VMA16	0.568757	0.636757	-0.567792	-0.557335	0.118857	-0.199243
YNL024C-A	KSH1	0.38008	0.638303	-0.464603	-0.467173	0.021551	-0.108158
YKR097W	PCK1	0.785272	1.05516	-0.822103	-1.05238	0.050512	-0.016457
YDR070C	FMP16	0.854515	1.13791	-1.34096	-0.497241	0.046226	-0.200449
YHR174W	ENO2	0.164097	0.352627	-0.020164	-0.368062	0.126813	-0.255311
YDR019C	GCV1	0.991003	1.10698	-1.54366	-1.94724	0.499198	0.893724
YJL108C	PRM10	0.512553	1.02969	0.12792	-1.87636	0.008148	0.198043
YBL086C	YBL086C	1.13189	0.74508	-1.12498	-0.866225	-1.00083	1.11506
YNL264C	PDR17	0.33557	0.283096	-0.384591	-0.519809	0.104958	0.180776
YBL015W	ACH1	0.418928	0.472714	-0.414003	-0.705883	0.208031	0.020213
YMR059W	SEN15	0.724485	1.08613	-0.210465	-1.42564	0.11783	-0.292344
YPL004C	LSP1	0.282459	0.563936	-0.531795	-0.64766	0.028956	0.304104
YKR066C	CCP1	0.247349	0.278931	-0.559293	-0.653926	0.422665	0.264274
YJL079C	PRY1	0.649715	0.518002	-0.175083	-0.688914	0.037775	-0.341495
YPL145C	KES1	0.27049	0.393753	-0.044283	-0.515724	-0.149892	0.045657
YHR076W	PTC7	0.473331	0.498778	-0.345572	-0.712159	0.138418	-0.052796
YNL142W	MEP2	0.797838	0.457741	-0.270967	-0.671172	-0.375632	0.062191
YKR039W	GAP1	0.837553	0.759578	-0.314627	-1.0273	-0.323367	0.068162
YKL003C	MRP17	0.382381	0.530588	-0.587713	-0.559961	0.000682	0.234023
YBR241C	YBR241C	1.09366	0.912655	-0.280033	-0.904461	-0.313688	-0.508133
YIL090W	ICE2	0.381573	0.575507	-0.267915	-0.796885	-0.131535	0.239255
YKR004C	ECM9	0.40321	0.481924	-0.198002	-0.724038	-0.230039	0.266946
YFR008W	FAR7	0.902211	0.212329	-0.037809	-0.917571	-0.156512	-0.002649
YLR444C	YLR444C	1.56271	0.438928	-1.27913	-1.43541	0.356456	0.356456
YLR008C	PAM18	0.159644	0.284892	-0.571552	-0.520735	0.272424	0.375327
YOR175C	ALE1	0.444694	0.535166	-0.13044	-0.742347	-0.171167	0.064094
YGR026W	YGR026W	0.410646	0.501981	-0.642582	-0.806556	0.295925	0.240586
YNL018C	YNL018C	1.34461	1.35833	-1.14674	-1.30301	-0.14657	-0.106623
YDR225W	HTA1	0.358256	0.599148	-0.402214	-0.527862	0.156045	-0.183373
YGL067W	NPY1	0.446308	0.455544	-0.543254	-0.717455	0.005523	0.353334
YBL005W-B	YBL005W-B	0.183206	0.183206	0.536275	-1.2691	0.183206	0.183206
YGR191W	HIP1	0.36489	0.615874	-0.293729	-0.576398	-0.100537	-0.0101
YOR270C	VPH1	0.298258	0.344525	-0.164044	-0.622124	-0.057291	0.200676
YIL039W	TED1	0.23903	0.337275	-0.049155	-0.337935	-0.164907	-0.024307
Q0085	ATP6	1.11505	0.762228	-0.363516	-1.56449	0.245366	-0.194639
YBL011W	SCT1	0.405361	0.423903	-0.023629	-0.531357	-0.166729	-0.107549
YOR212W	STE4	0.557847	0.393991	-0.801392	-0.915851	0.606857	0.158549
YOL146W	PSF3	0.468192	0.499931	-0.35616	-0.717554	0.163783	-0.058192
YNL146W	YNL146W	0.39318	0.865504	-0.431981	-1.05392	-0.044793	0.272015
YDR404C	RPB7	0.590756	0.786379	-0.451561	-0.74861	-0.138756	-0.038208
YOL122C	SMF1	0.311524	0.371396	-0.155842	-0.219411	-0.073133	-0.234533
YNL239W	LAP3	0.291545	0.371802	-0.334525	-0.948451	0.253563	0.366065
YBR074W	PFF1	0.253926	0.230575	-0.201345	-0.762849	0.11439	0.365303
YJL047C-A	YJL047C-A	0.399187	0.869415	-0.585611	-0.571965	0.386539	-0.497565
YHR041C	SRB2	1.14491	1.14455	-0.76152	-1.15881	-0.017941	-0.351194
YLR361C	DCR2	0.600442	0.543224	-0.242616	-0.743833	-0.172797	0.015581
YLR334C	YLR334C	0.127746	0.127746	1.48361	-1.9946	0.127746	0.127746
YER028C	MIG3	0.950456	1.31542	-0.50573	-0.773041	-0.229574	-0.757535
YDR297W	SUR2	0.458806	0.623059	-0.277567	-0.495411	-0.252411	-0.056476
YHR151C	MTC6	0.129696	0.560171	-0.269092	-0.58278	-0.062708	0.224713
YDL046W	NPC2	0.335393	0.658084	-0.453412	-0.816849	0.261207	0.015578
YFR007W	YFH7	0.333642	0.308971	-0.577145	-0.483905	0.165871	0.252566
YKL081W	TEF4	0.30239	0.410737	-0.072857	-0.492277	-0.107297	-0.040695
YML106W	URA5	0.327973	0.332873	-0.211165	-0.487671	0.040466	-0.002476
YPL103C	FMP30	0.104598	0.389401	-0.399939	-0.597589	0.281383	0.222146
YLL031C	GPI13	0.162567	0.406029	-0.151568	-0.749741	0.006072	0.326641
YIL113W	SDP1	0.782626	0.312671	-0.703071	-0.814956	0.207679	0.21505
YLR064W	PER33	0.259968	0.48816	-0.220484	-0.801218	0.165046	0.108527
YDL232W	OST4	0.200756	0.713811	-0.233362	-0.878844	0.01538	0.182259
YDR233C	RTN1	0.340379	0.578652	-0.09472	-0.618928	-0.189745	-0.015638
YIL013C	PDR11	0.40654	0.277477	-0.030851	-0.703983	-0.060695	0.111511
YGR036C	CAX4	0.607629	0.874434	-0.762707	-1.45242	0.260974	0.472087
YHR037W	PUT2	0.624214	0.601973	-0.932224	-0.70148	0.027543	0.379975
YBR004C	GPI18	0.34142	0.530164	-0.332232	-0.784599	0.047987	0.19726
YDR154C	YDR154C	0.307437	0.132674	-0.048669	-0.977091	0.341582	0.244066
YDL199C	YDL199C	0.147475	0.40664	-0.460477	-0.723672	0.194644	0.435391
YGR266W	YGR266W	1.49512	1.50884	-1.27633	-1.503	-0.474105	0.249472
Q0070	AI5_ALPHA	0.871838	-0.50348	-0.750022	-0.750022	0.750609	0.381078
YIL118W	RHO3	0.386653	0.511172	-0.250496	-0.672561	-0.053992	0.079223
YGL230C	YGL230C	1.95241	1.3692	-1.7639	-1.92018	0.208251	0.154221
YER005W	YND1	0.401167	0.33739	-0.266378	-0.556675	-0.011081	0.095577
YEL070W	DSF1	0.881657	0.48486	-1.06328	-0.930049	0.24145	0.385359
YPL081W	RPS9A	0.740048	0.63828	-0.277935	-0.587013	-0.29983	-0.21355
YBR263W	SHM1	0.314759	0.407447	-0.093778	-0.514465	-0.078801	-0.035162
YML087C	AIM33	0.678334	0.795563	-0.622937	-0.691754	0.086179	-0.245385
YJR113C	RSM7	0.290853	0.402931	-0.034465	-0.357752	-0.018216	-0.283352
YMR272C	SCS7	0.918733	0.860542	-0.913553	-0.410631	-0.332828	-0.122262
YBR109C	CMD1	0.291298	0.240553	-0.284792	-0.681668	0.331878	0.102731
YNR041C	COQ2	0.447839	0.447071	0.093313	-0.439459	0.00072	-0.549484
YJR077C	MIR1	0.50802	0.445642	-0.212214	-0.981239	0.236538	0.003254
YPL245W	YPL245W	0.52846	0.415569	-0.172899	-0.700272	-0.010584	-0.060275
YOL147C	PEX11	0.478615	0.542863	-0.139662	-0.878273	0.026011	-0.029554
YML085C	TUB1	0.358838	0.469837	-0.248756	-0.423526	-0.079308	-0.077085
YMR221C	YMR221C	0.526104	0.663792	-0.264948	-0.710356	-0.200539	-0.014052
YNL029C	KTR5	0.512281	0.445987	-0.420325	-0.485838	-0.09047	0.038364
YDR222W	YDR222W	1.2138	1.41195	-0.831571	-1.82279	-0.298952	0.327558
YIR020C	YIR020C	0.98886	0.909025	-0.780467	-0.532356	-0.158814	-0.426247
YGL139W	FLC3	0.60011	0.575525	-0.071463	-0.801795	-0.299669	-0.002708
YDR534C	FIT1	1.46051	1.28943	-1.42864	-1.90684	0.096056	0.489485
YHL003C	LAG1	0.274854	0.42989	-0.098264	-0.592937	-0.158896	0.145352
YLR342W-A	YLR342W-A	0.373702	0.322073	-0.168578	-0.543497	0.137474	-0.121174
YPR066W	UBA3	0.209202	0.430071	-0.565524	-1.05195	0.3846	0.593604
YGL001C	ERG26	0.545168	0.417813	-0.585287	-0.500138	0.180497	-0.058053
YHR008C	SOD2	0.723552	0.599773	-0.911837	-0.319655	-0.261615	0.169782
YDR046C	BAP3	0.378517	0.562155	-0.1499	-0.430327	-0.240413	-0.120031
YBL089W	AVT5	0.404771	0.757845	-0.515626	-0.600012	0.011935	-0.058913
YLR179C	YLR179C	0.401264	0.388012	-0.022621	-0.384721	0.026842	-0.408776
YIL114C	POR2	0.42759	0.499535	-0.243504	-0.326111	-0.268071	-0.08944
YJR105W	ADO1	0.633177	0.702572	-0.15295	-0.686708	-0.254198	-0.241893
YNL281W	HCH1	0.327008	0.391182	-0.090124	-0.45754	0.053243	-0.223769
YFL039C	ACT1	0.320697	0.332735	-0.168408	-0.664164	0.033719	0.145421
YMR246W	FAA4	0.853004	0.766764	-0.250667	-0.794693	-0.356593	-0.217815
YDR338C	YDR338C	0.41237	0.462127	-0.586907	-0.798681	0.268758	0.242333
YJL107C	YJL107C	0.565979	0.525858	-0.172026	-0.913267	-0.415604	0.40906
YPR120C	CLB5	0.195242	0.473562	-0.225134	-0.972158	0.325553	0.202936
YPL041C	YPL041C	0.364053	0.776917	-0.449553	-0.524302	-0.122307	-0.044808
YHR086W	NAM8	0.259905	0.312427	-0.241622	-0.744479	0.063278	0.350491
YDR107C	TMN2	0.518052	0.643843	-0.691367	-1.1843	0.288088	0.425679
YHR007C	ERG11	1.12556	0.847716	-0.935399	-1.19004	0.115697	0.036469
YBR034C	HMT1	0.290894	0.308648	-0.043493	-0.586975	-0.080741	0.111667
YOL030W	GAS5	0.539321	0.656917	-0.469462	-0.967583	-0.012906	0.253713
YDR056C	YDR056C	0.306303	0.577933	-0.284069	-0.479587	0.010903	-0.131483
YOR067C	ALG8	0.342802	0.621692	-0.419628	-0.777142	0.047244	0.185032
YDL212W	SHR3	0.509762	0.861471	-0.489473	-0.727467	-0.005506	-0.148787
YMR191W	SPG5	0.228745	0.332376	-0.371879	-0.591352	0.315084	0.087025
YJL194W	CDC6	1.1215	0.914464	-0.716975	-1.10239	-0.158741	-0.057859
YDR410C	STE14	0.561232	0.695915	-0.192072	-0.58585	-0.152807	-0.326418
YBR054W	YRO2	1.86762	1.88823	-1.63718	-1.79346	0.071932	-0.397136
YAL037W	YAL037W	0.66645	0.279637	-0.912355	-0.846242	0.533726	0.278784
YDR132C	YDR132C	0.472576	0.428364	-0.384214	-1.00134	0.111498	0.37311
YPL234C	VMA11	0.405544	0.571451	-0.594216	-0.53944	0.232504	-0.075843
YGR035C	YGR035C	0.180031	0.396328	-0.403347	-0.782019	0.244966	0.364042
YGL222C	EDC1	0.354661	0.359466	-0.697397	-0.619211	0.094181	0.5083
YMR319C	FET4	0.383905	0.296995	-0.392609	-0.979033	0.100487	0.590254
YNL046W	YNL046W	0.608879	0.926289	-0.342586	-0.792597	-0.203326	-0.196659
YOR269W	PAC1	0.360761	0.431251	-0.315493	-0.846812	0.188509	0.181785
YCL001W-B	YCL001W-B	-0.34958	1.69657	-0.219689	-0.219689	-1.21927	0.311663
YNR018W	RCF2	1.63461	1.93937	-1.06283	-1.92693	-0.483002	-0.101213
YNL048W	ALG11	0.236685	0.299722	-0.428597	-0.620611	0.26008	0.252721
YPL028W	ERG10	0.434247	0.47482	-0.150763	-0.41803	-0.178909	-0.161365
YNR021W	YNR021W	0.214178	0.327647	-0.213199	-0.635619	0.080535	0.226459
YDR344C	YDR344C	0.903324	0.988998	-0.266091	-1.50983	-0.381403	0.265006
YNL320W	YNL320W	0.370313	0.650294	-0.315863	-0.695596	-0.007208	-0.001941
YDR524C-B	YDR524C-B	1.16907	1.38923	-0.317108	-1.36445	-0.540363	-0.33638
YMR215W	GAS3	0.365165	0.667708	-0.086809	-0.460582	-0.274106	-0.211375
YGL021W	ALK1	0.386156	0.207034	-0.040646	-0.708178	0.025341	0.130293
YJR124C	YJR124C	0.395532	0.469406	-0.401306	-0.355247	-0.017364	-0.091022
YBR069C	TAT1	1.61521	1.55331	-1.46346	-2.2149	0.050104	0.45973
YOR009W	TIR4	0.3532	0.366146	0.191808	-0.767779	-0.199629	0.056254
YPR157W	TDA6	0.285356	0.452712	-0.054511	-0.651362	-0.057269	0.025074
YMR210W	YMR210W	0.804779	0.540242	-0.794491	-0.705014	-0.101958	0.256442
YPR071W	YPR071W	0.636031	0.766435	-0.804069	-1.33586	0.338007	0.399454
YGR147C	NAT2	0.502738	0.541922	-0.319236	-0.673455	-0.043524	-0.008446
YJL093C	TOK1	0.410051	0.412064	-0.360059	-0.62291	0.118003	0.04285
YEL006W	YEA6	0.452796	0.672651	-0.579171	-1.01427	0.150324	0.317666
YHR163W	SOL3	0.505576	0.398038	-0.31331	-0.617579	0.031743	-0.004467
YBR159W	IFA38	0.191108	0.477189	-0.496147	-0.46252	0.103449	0.186923
YDL049C	KNH1	1.84447	1.29443	-2.25371	-1.67302	0.248956	0.53888
YPL227C	ALG5	0.26799	0.387616	-0.262881	-0.557607	0.066591	0.098291
YAL044C	GCV3	0.393203	0.709402	-0.305928	-0.712773	-0.083722	-0.000183
YHR115C	DMA1	0.399102	0.251477	-0.088073	-0.810936	0.036081	0.212349
YMR203W	TOM40	0.226649	0.496784	-0.268715	-0.627618	0.045693	0.127208
YEL020W-A	TIM9	0.421328	0.733517	-0.139519	-0.840428	-0.275428	0.10053
YBR284W	YBR284W	0.870456	0.732871	-1.05627	-1.21255	0.308888	0.356612
YBR106W	PHO88	0.347585	0.504988	-0.26763	-0.605502	0.067766	-0.047208
YMR056C	AAC1	0.884721	1.20455	-0.694085	-0.58733	-0.169393	-0.638461
YER066W	RRT13	0.931067	0.472869	-0.428904	-0.755108	-0.041716	-0.178208
YAR031W	PRM9	1.12652	1.22514	-0.300281	-1.45656	-0.913093	0.318279
YLR023C	IZH3	0.456462	0.496535	-0.069412	-0.512214	-0.223064	-0.148307
YNL067W	RPL9B	0.305706	0.413072	-0.287694	-0.674908	0.182245	0.06158
YKL184W	SPE1	0.560509	0.471548	-0.478072	-0.59145	0.155648	-0.118184
YDR043C	NRG1	1.32176	1.06553	-0.482604	-1.53197	-0.522837	0.150115
YJL112W	MDV1	0.467098	0.343319	-0.106253	-0.650603	-0.27706	0.223499
YCR075C	ERS1	0.815313	0.887085	-0.658795	-0.645149	-0.218495	-0.179959
YMR170C	ALD2	0.765779	0.765483	-0.752906	-1.0161	0.179444	0.0583
YOL109W	ZEO1	0.843438	1.12492	0.421501	-1.31974	-1.06578	-0.004333
YPR128C	ANT1	0.555289	0.606768	-0.313859	-0.338494	-0.278777	-0.230927
YKR059W	TIF1	0.594859	0.784839	-0.37622	-0.75929	-0.248682	0.004495
YLL055W	YCT1	0.677248	0.597096	-0.136395	-0.723309	-0.395975	-0.018665
YHR202W	YHR202W	0.791827	0.579239	-0.576943	-0.986979	0.282313	-0.089457
YOL075C	YOL075C	0.562391	0.623037	-0.490953	-0.585305	-0.142239	0.033069
YLR315W	NKP2	0.44518	0.572363	-0.133626	-0.611833	-0.210385	-0.0617
YIL120W	QDR1	1.28988	1.32417	-0.536849	-0.885773	-0.595072	-0.59636
YGL101W	YGL101W	0.739649	1.03091	-0.294836	-1.03608	-0.840534	0.400892
YNL101W	AVT4	0.422946	0.32106	-0.276186	-0.809379	0.134783	0.206776
YLR054C	OSW2	1.19895	0.423095	-0.780393	-0.936672	0.191758	-0.096738
YKL052C	ASK1	0.261965	0.41668	-0.050838	-0.531899	-0.024592	-0.071317
YJR019C	TES1	0.423576	0.309414	-0.549509	-0.821266	0.329884	0.3079
YER145C	FTR1	0.412349	0.557756	-0.429491	-0.762648	0.064612	0.157423
YOR142W	LSC1	0.268614	0.326337	-0.260572	-0.539447	0.09693	0.108138
YHR109W	CTM1	0.615816	0.357611	-0.110152	-0.812826	-0.01326	-0.037188
YNL131W	TOM22	0.294488	0.403754	-0.388655	-0.42999	0.084363	0.036041
YKR030W	GMH1	0.370592	0.569353	-0.282053	-0.57342	-0.034385	-0.050087
YDL033C	SLM3	0.369107	0.546708	-0.294735	-0.490185	-0.071046	-0.059848
YGL142C	GPI10	0.3099	0.433746	-0.321089	-0.665409	-0.0529	0.295751
YJL193W	YJL193W	0.524075	0.498056	-0.142526	-0.613679	-0.257839	-0.008088
YDR345C	HXT3	0.247498	0.202468	-0.392753	-0.821694	0.293046	0.471435
YBR018C	GAL7	1.14955	1.24817	-1.69229	-1.84857	0.10994	1.03319
YNL305C	BXI1	0.452826	0.425818	-0.382128	-0.492765	0.18866	-0.192411
YJR001W	AVT1	0.496872	0.7879	-0.465163	-0.571384	-0.125181	-0.123044
YAL069W	YAL069W	-0.435867	0.440354	-0.001122	-0.001122	-0.001122	-0.001122
YAR027W	UIP3	0.685225	0.65985	-0.821172	-1.1261	0.226324	0.375869
YBR291C	CTP1	0.458938	0.648575	-0.675949	-0.632291	0.202225	-0.001498
YML042W	CAT2	0.811371	0.535589	-0.286308	-0.780756	-0.321353	0.041457
YML091C	RPM2	0.58925	0.283721	-0.075486	-0.910879	-0.091233	0.204626
YKL217W	JEN1	0.450835	1.17505	-0.391005	-1.28425	0.259217	-0.20985
YEL036C	ANP1	0.603525	0.583238	-0.249917	-0.760943	-0.155011	-0.020892
YNL054W-B	YNL054W-B	2.05647	1.71494	-1.43447	-2.05018	-0.14338	-0.14338
YER113C	TMN3	0.773282	0.560235	-0.38936	-0.795891	-0.078486	-0.06978
YAL067C	SEO1	1.67181	1.67766	-1.13351	-1.08815	-0.544686	-0.583119
YLR105C	SEN2	0.553758	0.341442	-0.172605	-0.707396	-0.123286	0.108086
YNL116W	DMA2	0.33409	0.329041	0.000295	-0.370384	0.035181	-0.328224
YOL092W	YPQ1	0.242737	0.65478	-0.525215	-0.908129	0.141334	0.394494
YGL055W	OLE1	0.659581	0.788472	-0.391624	-0.967597	-0.104537	0.015705
YOR276W	CAF20	0.229255	0.427175	-0.199981	-0.540274	0.050735	0.033089
YDR459C	PFA5	0.206322	0.555031	-0.285021	-0.914053	0.233873	0.203848
YGL248W	PDE1	0.693684	0.543909	-1.12262	-0.826388	0.186564	0.524852
YER026C	CHO1	0.342645	0.447752	-0.439694	-0.810292	0.35156	0.108029
YHR028C	DAP2	0.300466	0.205334	-0.457707	-0.779496	0.308709	0.422694
YGR060W	ERG25	1.02775	1.13995	-0.661509	-1.08016	-0.343274	-0.082754
YGR172C	YIP1	0.191614	0.676714	-0.162066	-0.36459	-0.06085	-0.280822
YGR171C	MSM1	0.272876	0.349794	-0.413466	-0.698576	0.195078	0.294294
YDR373W	FRQ1	0.410627	0.511408	-0.521289	-0.484923	-0.006551	0.090729
YOR320C	GNT1	0.340645	0.269385	-0.089595	-0.457979	-0.036613	-0.025843
YGR074W	SMD1	0.22279	0.527659	0.039229	-0.682647	-0.269966	0.162934
Cluster_9	Cluster_9	0	0	0	0	0	0
YAR028W	YAR028W	1.57926	1.52198	-2.55164	-2.55164	0.789009	1.21303
YPL230W	USV1	1.74826	1.96998	-2.33304	-2.48932	0.376075	0.728038
YOL152W	FRE7	1.8962	1.54502	-3.94564	-3.10191	1.72696	1.87938
YDR133C	YDR133C	1.70685	1.08557	-1.35026	-3.29127	0.422122	1.42699
YML118W	NGL3	1.31324	1.2429	-1.8642	-2.82783	0.844918	1.29096
YCL049C	YCL049C	1.66916	1.72127	-2.24214	-2.55369	0.700268	0.705132
YJL214W	HXT8	1.58985	1.53597	-3.48465	-2.96286	1.47543	1.84625
YJL216C	IMA5	1.47515	1.42316	-2.58908	-2.74536	1.2002	1.23593
YDL210W	UGA4	2.18316	2.47442	-2.8286	-2.98488	0.365941	0.789958
YDR210W-B	YDR210W-B	1.35113	1.35113	-1.83164	-3.57288	1.35113	1.35113
YMR251W-A	HOR7	1.61212	1.41795	-3.45211	-1.02343	0.394506	1.05097
YHR094C	HXT1	0.763959	1.8416	-3.4099	-2.90721	1.52052	2.19103
YGR052W	FMP48	2.56335	2.70022	-4.35174	-3.50802	0.620412	1.97577
YJL116C	NCA3	1.58024	1.90951	-3.04121	-5.51942	2.19397	2.87691
YHR087W	RTC3	-0.041436	0.716423	-3.31821	-2.60002	2.58204	2.6612
YDL248W	COS7	1.52263	1.45633	-4.67677	-2.11443	1.94883	1.86341
YGR295C	COS6	1.28797	1.18589	-2.25841	-3.26269	1.53879	1.50845
YOL083W	ATG34	1.38807	1.28097	-2.97314	-1.45135	0.792556	0.962899
YBR294W	SUL1	2.0786	1.84293	-2.24436	-4.40064	1.72779	0.995685
YDR169C-A	YDR169C-A	1.27131	0.884497	-2.57053	-1.14185	1.40162	0.154946
YOR049C	RSB1	1.71088	1.53317	-3.72921	-4.47046	2.30183	2.65379
YJR155W	AAD10	1.27543	1.13298	-3.05762	-2.76876	1.84175	1.57623
YOR273C	TPO4	1.3843	1.41173	-2.88056	-2.97411	1.32311	1.73553
Cluster_10	Cluster_10	0	0	0	0	0	0
YIL169C	YIL169C	0.466568	-0.108104	-1.59209	-2.79652	1.87106	2.15909
YOR313C	SPS4	0.626911	0.82506	-1.62997	-1.78625	1.21665	0.747586
YPR027C	YPR027C	0.084769	-0.03901	-1.49404	-1.65032	1.21508	1.88352
YNL336W	COS1	1.08471	1.28556	-2.00674	-2.61048	1.10291	1.14404
YBR033W	EDS1	-0.072733	0.365367	-0.4	-2.29325	1.25022	1.15039
YHR140W	YHR140W	1.14251	0.826085	-2.11437	-2.27065	1.44274	0.973677
YOR107W	RGS2	0.057041	0.385774	-1.44776	-1.43412	1.18735	1.25172
YNL160W	YGP1	0.479447	0.712351	-1.88603	-2.33844	1.08282	1.94985
YJL078C	PRY3	0.952984	1.07747	-1.71677	-1.9996	0.632512	1.05339
YFL051C	YFL051C	0.691059	0.188769	-1.68129	-1.61518	0.764786	1.65186
YBR285W	YBR285W	0.758834	0.635055	-1.40493	-2.56121	1.15218	1.42008
YJR015W	YJR015W	0.076436	0.029278	-1.55241	-2.39016	1.83478	2.00208
YOR171C	LCB4	0.982214	1.13642	-1.95274	-2.29344	0.899121	1.22842
YFL056C	AAD6	0.948434	0.786504	-2.33435	-2.20683	1.50656	1.29968
YNR064C	YNR064C	0.490527	0.454211	-2.18139	-2.33767	1.75012	1.8242
YOL154W	ZPS1	0.875337	1.21099	-1.64457	-2.98528	1.2485	1.29503
YOR012W	YOR012W	0.288113	0.476924	-1.338	-2.27189	1.40674	1.4381
YFL057C	AAD16	0.655385	0.309214	-1.40885	-2.75777	1.66484	1.53718
YNL058C	YNL058C	0.839126	0.856901	-1.21031	-2.58898	0.845257	1.25801
YIL168W	YIL168W	0.176808	0.053029	-1.49511	-1.65139	1.55505	1.36161
YBR012C	YBR012C	0.382553	0.526708	-1.90407	-1.06035	0.898154	1.15701
YOR013W	YOR013W	0.466361	0.476438	-1.50101	-2.02926	1.27224	1.31523
YOL013W-B	YOL013W-B	0.966919	0.106174	-2.61189	-1.0346	1.36026	1.21313
YDL169C	UGX2	0.68662	0.977878	-2.15522	-1.3115	1.23197	0.570255
YKL096W-A	CWP2	0.383308	-0.029977	-1.63256	-2.31935	1.51362	2.08497
YLL052C	AQY2	0.194623	0.544775	-1.23218	-3.38846	1.9099	1.97134
YOR178C	GAC1	0.038573	0.314401	-2.07245	-1.40561	1.27251	1.85259
YLL053C	YLL053C	0.280855	0.327001	-1.97602	-2.54734	2.16605	1.74945
YMR175W	SIP18	0.291142	0.389755	-2.5507	-1.12201	1.53693	1.45489
YKR013W	PRY2	0.758351	0.94048	-1.33418	-2.01864	0.823794	0.8302
YJL218W	YJL218W	0.69292	0.569141	-2.13445	-2.13445	1.26802	1.73883
YGR043C	NQM1	0.967156	0.691374	-2.19661	-2.76793	1.47598	1.83003
YOR161C	PNS1	0.589652	1.25942	-1.48665	-3.14543	1.23934	1.54368
Cluster_11	Cluster_11	0	0	0	0	0	0
YLL019C	KNS1	-0.003235	-0.123754	-0.085119	-0.801282	0.391741	0.62165
YJL166W	QCR8	-0.277405	-0.236124	-0.578676	-0.275524	0.536432	0.831297
YDR125C	ECM18	0.665012	0.858715	-1.02927	-1.52259	0.232387	0.795741
YCR069W	CPR4	0.122035	0.055982	-0.399896	-0.754683	0.541455	0.435107
YHR083W	SAM35	0.070344	0.034498	-0.291604	-0.618167	0.301078	0.503851
YEL024W	RIP1	0.835678	0.583165	-1.45682	-1.6871	0.778361	0.946724
YOR289W	YOR289W	-0.090794	-0.081818	-0.656622	-0.521439	0.824348	0.526326
YGL136C	MRM2	-0.142104	-0.31723	-0.52543	-0.322815	0.667539	0.640039
YEL049W	PAU2	-0.618951	-1.03327	-1.09551	-1.57151	2.44715	1.87209
YNL168C	FMP41	-0.241098	0.01643	-0.564128	-0.59876	0.738107	0.649449
YGL028C	SCW11	0.239952	0.139926	-0.309223	-1.08152	0.150149	0.860716
YPL154C	PEP4	0.074545	0.236133	-0.514138	-0.64345	0.403001	0.443908
YDR377W	ATP17	-0.351838	-0.122508	-0.651785	-0.865397	1.00519	0.98634
YDR516C	EMI2	-0.179404	-0.301278	-0.760832	-0.567059	0.99455	0.814022
YER186C	YER186C	-0.289255	-0.097832	-0.21751	-0.597296	0.518078	0.683815
YOL077W-A	ATP19	-0.718759	-0.266037	-0.136101	-0.183446	0.768486	0.535859
YDL223C	HBT1	0.349834	0.249387	-0.488091	-1.58689	0.621918	0.853837
YPL192C	PRM3	0.088055	0.379313	-0.58386	-1.58814	0.633403	1.07123
YIL060W	YIL060W	-0.382147	-0.382147	-1.53943	-0.382147	1.84776	0.838119
YFR015C	GSY1	-0.034606	-0.4698	-1.86879	-1.06571	1.64833	1.79058
YCR017C	CWH43	0.069957	0.105958	-0.304204	-0.635874	0.294884	0.469279
YMR279C	YMR279C	0.372668	0.911854	-1.29925	-1.45553	0.561872	0.90838
YIL136W	OM45	-0.587418	-0.509563	-0.036941	-0.322503	0.596004	0.860421
YFL052W	YFL052W	0.126927	0.428453	-0.735672	-0.891951	0.712917	0.359326
YPR075C	OPY2	-0.34904	-0.316451	0.04085	-0.350807	0.555636	0.419812
YBL078C	ATG8	-0.440019	-0.419409	-0.244385	-0.546515	0.782214	0.868114
YIL053W	RHR2	-0.375859	-0.20761	-0.01878	-0.586686	0.643486	0.545449
YDR475C	JIP4	-0.454853	-0.452143	-0.124853	-0.705127	0.745573	0.991403
YGR111W	YGR111W	0.272552	0.038514	-0.460134	-0.772149	0.426789	0.494429
YAL034C	FUN19	-0.00445	-0.060414	-0.357011	-0.774677	0.606872	0.589679
YIR038C	GTT1	-0.519431	-0.562074	-0.505348	-0.359598	0.982035	0.964416
YKL062W	MSN4	-0.130054	-0.413161	-0.414264	-1.1975	0.814777	1.3402
YOR064C	YNG1	0.302946	0.36558	-0.724449	-1.16084	0.382631	0.834129
YDR326C	YSP2	-0.021045	-0.048934	-0.14019	-0.955874	0.305373	0.860669
YKL093W	MBR1	-0.541146	-0.179498	0.049973	-1.46888	0.726668	1.41288
YGL146C	RRT6	0.5344	0.147587	-0.985512	-1.87876	1.24967	0.932609
YHR143W	DSE2	-0.281729	-0.235583	0.047401	-0.656206	0.224678	0.901439
YOR173W	DCS2	0.04122	-0.899695	-1.03279	-0.88095	1.30193	1.47029
YPR160W	GPH1	-0.399062	-1.04097	-1.31425	-1.01199	1.65299	2.11328
YML072C	TCB3	-0.131009	-0.107087	-0.102605	-0.690224	0.22147	0.809456
YEL023C	YEL023C	0.115522	-0.09572	-0.321928	-1.16271	0.406297	1.05854
YML064C	TEM1	-0.34192	-0.09019	-0.316398	-0.456736	0.333824	0.871421
YBR039W	ATP3	-0.429004	-0.15028	-0.069645	-0.557655	0.489276	0.717309
YKL018C-A	YKL018C-A	-1.7673	-0.083719	-0.702244	-0.595489	1.61094	1.5378
YNL316C	PHA2	-0.113394	0.080723	-0.424978	-0.638119	0.377248	0.718519
YJL133C-A	YJL133C-A	0.123931	0.059858	-0.667984	-0.711053	0.804934	0.390314
YMR250W	GAD1	0.264421	0.131087	-0.817778	-0.637022	0.500285	0.559007
YLR343W	GAS2	-0.844503	-0.745889	-0.516418	-1.03527	1.70084	1.44123
YOR190W	SPR1	-0.650614	0.003214	-0.466919	-0.783663	0.994269	0.903714
YGL121C	GPG1	-0.432426	-0.487492	-0.917573	-0.618172	1.38473	1.07094
YHR097C	YHR097C	-0.358345	-0.453555	-0.517612	-1.07551	1.30303	1.10198
YOR152C	YOR152C	-0.532128	-0.333979	-0.410494	-0.594788	0.757381	1.11401
YOR090C	PTC5	-0.504642	-0.465362	-0.083062	-0.47755	0.633355	0.897262
YPL087W	YDC1	0.177771	0.252295	-0.636	-0.558023	0.528448	0.23551
YBR117C	TKL2	0.316606	-0.392136	-1.03981	-2.00344	1.34738	1.7714
YLR258W	GSY2	-0.198589	-0.523508	-0.369166	-0.183185	0.552469	0.721979
YNL331C	AAD14	-0.496055	-0.209201	-1.06609	-1.40878	1.70716	1.47297
YMR152W	YIM1	0.13537	0.194069	-0.566574	-0.671372	0.457058	0.45145
YER079W	YER079W	-0.146036	-0.180548	-0.6721	-0.59022	0.733467	0.855436
YPR124W	CTR1	0.642074	0.263317	-0.620586	-1.34455	0.554793	0.504951
YDR204W	COQ4	-0.060819	-0.047095	-0.326467	-0.690551	0.61006	0.514872
YKL008C	LAC1	-0.303673	0.084764	-0.282188	-0.500932	0.457385	0.544644
YDL072C	YET3	-0.129662	0.115669	-0.526329	-0.583353	0.604519	0.519156
YJR039W	YJR039W	-0.313371	-0.4558	-0.20915	-0.28721	0.659042	0.606488
YBR201C-A	YBR201C-A	-0.542451	-0.020514	-0.378486	-0.552253	0.678057	0.815647
YHR016C	YSC84	0.317152	0.087578	-0.841162	-0.486957	0.476317	0.447071
YNL200C	YNL200C	0.214429	0.177064	-0.947671	-0.668213	0.69139	0.533001
YOR390W	YOR390W	0.371909	0.579336	-1.3072	-1.3072	0.94034	0.722812
YOL071W	EMI5	-0.282614	-0.127417	-0.76831	-0.416795	0.808702	0.786435
YHL050C	YHL050C	-0.122233	-0.468404	-0.864537	-1.02082	1.238	1.238
YDR391C	YDR391C	0.05318	0.087192	-0.969958	-0.941319	0.934883	0.836022
YJL022W	YJL022W	-0.058586	-0.767328	-0.236548	-2.05671	1.29412	1.82505
YML011C	RAD33	0.278964	0.322641	-0.678354	-0.697129	0.516189	0.257689
YKL124W	SSH4	-0.090819	-0.334892	-0.201475	-0.645331	0.538594	0.733923
Q0045	COX1	0.189125	0.14394	-0.591182	-1.33343	0.672767	0.918783
YLR178C	TFS1	-0.249221	-0.169575	-0.868521	-0.654157	1.03998	0.901492
YKR070W	YKR070W	0.224705	0.091672	-0.593349	-0.766054	0.715534	0.327491
YGL037C	PNC1	-0.311631	-0.497109	-0.910827	-0.726161	1.25331	1.19241
YDL181W	INH1	-1.56084	-0.684615	-0.817714	-0.414071	1.37683	2.10041
YMR040W	YET2	-0.780059	-0.176856	-0.309955	-0.921914	1.01583	1.17295
YKL026C	GPX1	-0.751809	0.124412	-0.371257	-1.16497	1.06656	1.09706
YEL066W	HPA3	-0.450326	-0.531936	0.021178	-0.319861	0.79028	0.490665
YJL051W	IRC8	0.082427	0.020709	-0.183995	-1.01071	0.219065	0.8725
YHR022C	YHR022C	-0.52044	-0.135205	-0.390294	-0.826682	0.690791	1.18183
YGL158W	RCK1	-0.176695	-0.452478	-0.055061	-1.58985	1.024	1.25008
YGR194C	XKS1	-0.417841	-0.267258	-0.291715	-0.312531	0.61154	0.677805
YNR059W	MNT4	-0.280528	-0.443127	-0.09549	-0.400122	0.529449	0.689819
YCL026C-B	HBN1	-1.37168	-1.14399	-0.731654	-0.887933	2.11497	2.02029
YDR452W	PPN1	0.067651	0.02104	-0.600495	-1.07194	0.654301	0.929444
YDR223W	CRF1	-0.433274	-0.270432	-0.643358	-0.878492	1.14344	1.08212
YBR013C	YBR013C	0.616789	0.380535	-0.640089	-1.65886	0.512634	0.788994
YKR102W	FLO10	-0.172702	-0.361773	0.193185	-0.866879	0.468346	0.739824
YLR136C	TIS11	-0.505482	-0.846073	-0.355734	-0.987352	1.54729	1.14735
YOR085W	OST3	0.005994	0.288323	-0.342032	-0.723624	0.292546	0.478792
YNL040W	YNL040W	0.101106	-0.21793	-0.123269	-0.752885	0.451197	0.541781
YDR148C	KGD2	-0.231265	-0.197608	-0.161987	-0.457459	0.491047	0.557272
Q0105	COB	0.157984	-0.141265	-1.1677	-1.60504	1.45109	1.30494
YMR157C	AIM36	0.020354	0.113806	-0.581172	-0.783994	0.642518	0.588488
YHR171W	ATG7	0.085884	0.160045	-0.5917	-0.725436	0.646008	0.425199
Q0275	COX3	-0.355214	-0.784523	-0.838314	-1.5905	1.8698	1.69876
YGR165W	MRPS35	-0.15951	-0.032327	-0.402032	-0.530022	0.520059	0.603832
YDL070W	BDF2	0.450161	0.52854	-1.14481	-1.17006	0.658685	0.67749
YJL141C	YAK1	-0.056517	-0.440078	-0.057434	-0.532917	0.496949	0.589996
YIL058W	YIL058W	-0.187007	-0.187007	-0.187007	-1.89052	1.4603	0.991236
YER001W	MNN1	0.472667	0.701503	-0.827137	-1.38241	0.475309	0.560065
YBR194W	AIM4	-0.284561	-0.154023	-0.331515	-0.502901	0.709115	0.563885
YGL258W	VEL1	-0.397958	-0.521737	-1.3918	-2.13304	2.21778	2.22676
YGR008C	STF2	-0.478549	-0.038427	-0.71983	-0.850483	1.02302	1.06427
YGR169C	PUS6	-0.37662	-0.566488	-0.041375	-0.364013	0.630116	0.71838
YDR012W	RPL4B	-0.503333	-0.186316	-0.012633	-0.589288	0.551541	0.740029
YOR264W	DSE3	0.042644	-0.443023	-0.130711	-0.880998	0.511978	0.90011
YDR011W	SNQ2	-0.167827	-0.305403	-0.193338	-0.626685	0.502027	0.791227
YPL064C	CWC27	-0.459638	-0.472993	0.275264	-0.564042	0.758136	0.463273
YNR065C	YNR065C	-0.272145	-0.379982	-0.35791	-0.690655	0.648629	1.05206
YGR281W	YOR1	-0.301488	-0.490215	-0.034367	-0.331059	0.527411	0.629719
YOL126C	MDH2	-0.088385	0.175423	-0.304265	-0.926208	0.503391	0.640045
YJR108W	ABM1	-0.351272	-0.606295	-0.002428	-0.480635	0.74733	0.6933
YOR092W	ECM3	-0.058244	0.052063	-0.683302	-1.35136	0.898264	1.14258
YDR040C	ENA1	0.052219	-0.371121	-1.6197	-1.77598	1.57485	2.13973
YOR133W	EFT1	-0.045445	-0.275032	-0.375305	-0.954432	0.794674	0.85554
YPR184W	GDB1	-0.099742	-0.279123	-0.741965	-0.930666	0.902308	1.14919
YGL196W	DSD1	0.153628	-0.048153	-0.586891	-0.980209	0.696741	0.764883
YPR047W	MSF1	-0.301392	-0.303492	-0.016259	-0.441928	0.514186	0.548885
YPL078C	ATP4	-0.386176	-0.466725	-0.178147	-0.190793	0.67963	0.54221
YPL177C	CUP9	-0.15557	-0.064682	-0.403487	-1.29897	0.782737	1.13997
YAL061W	BDH2	0.716153	0.924949	-1.29561	-1.45189	0.483893	0.622508
YHL022C	SPO11	-0.735734	-0.274551	-0.670684	-1.56393	1.5645	1.6804
YOL107W	YOL107W	0.172132	0.407681	-0.544177	-0.963491	0.42463	0.503226
YCL035C	GRX1	-0.463886	-0.407545	-0.185241	-0.14392	0.75208	0.448512
YIL111W	COX5B	-0.088831	0.082846	-1.08632	-0.909757	0.994265	1.0078
YFL025C	BST1	-0.00376	0.052474	-0.165158	-0.734107	0.342964	0.507587
YDR055W	PST1	-0.400672	-0.416567	-0.180635	-0.570734	0.647575	0.921032
YGR235C	MOS2	-0.223025	-0.223573	-0.212281	-0.430957	0.566861	0.522975
YDL136W	RPL35B	-0.295925	-0.230188	-0.028262	-0.711584	0.561315	0.704644
YGR019W	UGA1	-0.207352	-0.220512	-0.262112	-0.600254	0.617395	0.672835
YHL021C	AIM17	-0.030558	-0.10241	-0.547452	-0.712805	0.636065	0.75716
YNR014W	YNR014W	-0.469768	-0.029646	-0.790776	-1.15856	1.45891	0.989841
YBL093C	ROX3	-0.0381	-0.18361	-0.261811	-0.704737	0.571118	0.61714
YPL198W	RPL7B	-0.496608	-0.484362	-0.18687	-0.643285	0.842517	0.968608
YDL182W	LYS20	0.402393	0.257397	-0.560199	-1.49409	0.417665	0.976831
Q0144	Q0144	-0.432531	-0.432531	-0.432531	-0.432531	1.19592	0.534207
YKL016C	ATP7	-0.049844	-0.138647	-0.175669	-0.672177	0.456253	0.580084
YDL204W	RTN2	-0.136198	-0.213183	-0.221391	-0.487294	0.452102	0.605965
YGR066C	YGR066C	0.61366	0.904918	-1.22818	-1.96942	0.574045	1.10498
YER046W	SPO73	-0.392524	0.032859	-0.144408	-0.893144	0.748356	0.648862
YLR063W	YLR063W	0.227234	-0.30463	-0.072079	-1.29445	0.675285	0.768637
YDL202W	MRPL11	-0.225353	0.163517	-0.211203	-0.738045	0.390385	0.6207
YMR171C	EAR1	-0.015696	0.038428	-0.349244	-0.539671	0.322842	0.543342
YML004C	GLO1	-0.27856	-0.425521	-0.107427	-0.317102	0.614848	0.513761
YKR061W	KTR2	0.216051	0.071807	-0.833022	-0.732143	0.781576	0.495731
YCR022C	YCR022C	-0.371908	0.260251	-0.371908	-2.35106	1.65184	1.18278
YKL109W	HAP4	0.232633	-0.139074	-0.950245	-1.03613	0.787441	1.10538
YBL094C	YBL094C	0.264637	0.140858	-0.477667	-1.63395	0.587593	1.11852
YKL162C	YKL162C	0.198852	0.338107	-0.964916	-0.951271	0.618669	0.760559
YFR052C-A	YFR052C-A	0.110855	-0.749889	-1.0694	-0.874208	1.17405	1.40859
YBR126C	TPS1	-0.025859	-0.244447	-0.654805	-0.559458	0.730182	0.754387
YER062C	HOR2	-0.071809	-0.153463	-0.869449	-0.991926	1.1486	0.938044
YIL170W	HXT12	-0.898343	-1.02212	-1.15522	-1.3115	3.03932	1.34786
YOR347C	PYK2	0.073615	0.022669	-1.1328	-1.23596	1.11734	1.15514
YDR150W	NUM1	-0.176707	-0.530756	0.321409	-0.834447	0.294829	0.925673
YBL064C	PRX1	-0.310258	-0.276085	-0.520215	-0.492531	0.849556	0.749534
YNL024C	YNL024C	0.172457	0.225982	-1.22415	-1.35618	1.13215	1.04974
YKL150W	MCR1	-0.303726	-0.433606	-1.36189	-0.983575	1.48473	1.59806
YER158C	YER158C	0.022495	0.295283	-0.385676	-0.695141	0.14961	0.613429
YLR364W	GRX8	0.089444	0.283006	-0.500857	-1.19247	0.677103	0.643772
YGR197C	SNG1	-0.024705	0.23315	-0.673773	-1.2091	0.886596	0.78783
YOR386W	PHR1	0.758439	0.169318	-0.654943	-1.3301	0.4782	0.579082
YLR251W	SYM1	-0.209651	0.34938	-1.32214	-0.741452	1.04777	0.87609
YLR046C	YLR046C	0.088833	0.18856	-0.315721	-0.768242	0.302472	0.504097
YLR252W	YLR252W	-0.295345	-0.056554	-0.485109	-0.708502	0.764576	0.780935
YFR053C	HXK1	-0.240982	-0.476971	-1.12262	-1.1016	1.51408	1.42809
YMR195W	ICY1	-0.71734	-0.326546	-1.6661	-1.56862	2.00934	2.26926
YBR136W	MEC1	-0.408434	-0.634783	0.026398	-0.947121	0.827529	1.13641
YKL071W	YKL071W	-1.21491	-0.879259	-1.01236	-2.04311	2.61584	2.5338
YOR120W	GCY1	-0.249516	-0.170802	-0.172656	-0.548717	0.59786	0.543831
YGR137W	YGR137W	0.27786	-0.193842	-0.746844	-0.720259	0.97005	0.413035
YMR196W	YMR196W	0.473179	-0.057417	-1.0541	-0.902253	0.845132	0.695455
YGL262W	YGL262W	0.634061	0.872852	-0.845209	-2.00149	0.764372	0.575412
YML009W-B	YML009W-B	-0.971772	-1.09555	0.356313	-1.38493	1.15854	1.9374
YIL045W	PIG2	-0.023677	-0.588029	-0.311251	-0.919227	0.849661	0.992523
YER056C-A	RPL34A	-0.197094	0.174448	-0.271184	-0.643798	0.486026	0.451603
YPR003C	YPR003C	0.085878	0.044284	-0.263446	-0.699833	0.260281	0.572836
YBR169C	SSE2	0.328251	0.204472	-0.518119	-0.840076	0.449488	0.375985
Q0250	COX2	0.189599	0.00295	-0.953202	-0.73504	0.872451	0.623242
YBR085C-A	YBR085C-A	0.302272	0.575402	-0.69823	-1.29197	0.6071	0.505424
YNL098C	RAS2	-0.401176	-0.2485	-0.029705	-0.4224	0.412254	0.689527
YIR005W	IST3	0.119936	0.078619	-0.349936	-0.965646	0.484712	0.632316
YNR061C	YNR061C	-0.096681	0.027943	-0.365657	-0.616058	0.666966	0.383488
YMR253C	YMR253C	0.617078	0.435583	-1.26783	-1.22058	0.659926	0.775821
YBR132C	AGP2	-0.028112	-0.335603	-0.277171	-0.66105	0.509373	0.792563
YDR074W	TPS2	-0.182758	-0.459567	0.076279	-0.498563	0.356913	0.707695
YOR185C	GSP2	-0.040336	-0.11212	-1.18276	-1.49376	1.54579	1.28317
YCR091W	KIN82	-0.334611	-0.690206	0.073847	-0.598021	0.714563	0.834427
YBR003W	COQ1	0.016154	0.149584	-0.352054	-0.767067	0.369925	0.583457
YHR080C	YHR080C	0.240172	0.063605	-0.271127	-1.08096	0.396169	0.652137
YEL043W	YEL043W	0.141088	0.143841	-0.204326	-0.818896	0.307022	0.431271
YHL010C	ETP1	-0.696863	-0.48184	-0.146386	-0.442595	0.885143	0.882542
YOL082W	ATG19	-0.371164	-0.604731	-0.018417	-0.457426	0.762252	0.689486
YPR026W	ATH1	0.026192	-0.039127	-0.465789	-0.958431	0.581	0.856155
YGL071W	AFT1	-0.41067	-0.511847	0.230203	-0.901829	0.69668	0.897464
YPR119W	CLB2	0.047164	0.032526	-0.365185	-1.00437	0.385625	0.904238
YPL017C	IRC15	0.837252	0.152758	-0.494914	-1.65119	0.254844	0.901254
YJL199C	YJL199C	-1.23727	-0.607689	-0.92299	-0.570256	1.75811	1.58009
YLR300W	EXG1	0.097248	0.223747	-0.822743	-1.00172	0.654295	0.849177
YOR155C	ISN1	-0.257461	-0.322105	-0.496342	-0.29536	0.608608	0.762659
YOR044W	IRC23	0.47286	0.971276	-1.17104	-1.25517	0.454307	0.527767
YGL194C-A	YGL194C-A	0.151604	-0.342544	-0.547792	-0.86019	0.929033	0.669889
YGR070W	ROM1	-0.223808	-0.592272	0.23125	-0.714006	0.589975	0.708861
YDR033W	MRH1	0.574496	0.684804	-0.899858	-2.00594	0.56575	1.08075
YLR177W	YLR177W	-0.100635	-0.2746	-0.178029	-0.884311	0.630986	0.806588
YMR315W	YMR315W	0.270131	0.228953	-1.41771	-1.39659	1.14688	1.16834
YBR119W	MUD1	-0.536278	-0.313881	0.169692	-0.723553	0.653904	0.750117
YGR112W	SHY1	0.040999	-0.141197	-0.506658	-0.635192	0.586347	0.6557
YCL012C	YCL012C	0.292249	0.387783	-0.604453	-0.901595	0.546295	0.27972
YDR031W	MIC14	0.084368	-0.676841	-1.17251	-1.13614	1.53661	1.36452
YKR058W	GLG1	-0.391878	-0.46121	-0.082409	-0.574738	0.592581	0.917653
YEL065W	SIT1	-0.70003	-0.549634	-0.834736	-1.49506	1.57691	2.00255
YLL063C	AYT1	0.590379	0.524316	-1.41205	-1.41205	0.963961	0.745437
YML081C-A	ATP18	-0.034683	0.338444	-0.415367	-0.724224	0.477057	0.358772
YHR175W-A	YHR175W-A	0.626565	0.522151	-1.13933	-1.29561	0.832824	0.453394
YML100W	TSL1	0.075703	-0.154229	-1.40963	-1.73826	1.48165	1.74477
YPR002C-A	YPR002C-A	-0.571948	-0.571948	-0.571948	-0.571948	1.37843	0.909363
YDR062W	LCB2	-0.246102	-0.300692	-0.164627	-0.453785	0.610592	0.554614
YJR009C	TDH2	-0.37876	-0.260315	-0.278865	-0.491344	0.737853	0.671432
YMR090W	YMR090W	0.317413	0.290931	-1.23645	-0.96742	0.776346	0.819178
YDR063W	AIM7	-0.285346	-0.193397	-0.360284	-0.496195	0.757016	0.578205
YDR441C	APT2	-0.101445	-0.150585	-0.259638	-0.72745	0.827072	0.412045
YPL123C	RNY1	-0.108032	-0.094307	-0.464445	-0.521189	0.541653	0.646321
YMR105C	PGM2	-0.527214	-0.81715	-0.943491	-0.970873	1.66801	1.59071
YOR230W	WTM1	-0.042671	-0.114712	-0.489485	-0.827853	0.797104	0.677617
YBR193C	MED8	-0.217986	0.011872	-0.40775	-0.510391	0.458606	0.665649
YMR169C	ALD3	0.457709	0.266816	-1.14312	-1.54041	0.918665	1.04034
YKL157W	APE2	-0.272023	-0.349774	0.001761	-0.343439	0.332696	0.630779
YMR174C	PAI3	-0.227503	0.020686	-1.24992	-0.821232	1.0248	1.25317
YCR024C-A	PMP1	0.319208	0.766421	-0.564958	-1.49884	0.243233	0.734941
YBL013W	FMT1	-0.125638	-0.179027	-0.482051	-1.19776	1.05198	0.932496
YBR083W	TEC1	-0.182484	-0.306263	0.145601	-1.46134	0.819093	0.985393
YGL045W	RIM8	0.012286	-0.531944	-0.069274	-0.76808	0.732952	0.62406
YLR149C	YLR149C	-0.240761	-0.465234	-0.687969	-0.44315	0.831669	1.00544
YGR254W	ENO1	0.19688	0.32558	-1.44211	-1.21489	1.23859	0.895952
YOR062C	YOR062C	-0.48348	-0.21298	-1.06229	-1.07172	1.46006	1.37041
YPL072W	UBP16	-0.139418	0.015957	-0.25732	-0.780381	0.515159	0.646004
YDR453C	TSA2	-0.155975	-0.02675	-0.90429	-0.825518	1.01701	0.895521
YHR147C	MRPL6	-0.18955	0.125244	-0.268091	-0.650962	0.474192	0.509167
YGL096W	TOS8	-0.634101	0.083423	-0.475941	-0.678024	0.692607	1.01204
YDR387C	YDR387C	0.333813	0.37922	-0.8902	-0.796501	0.496988	0.476679
YOR288C	MPD1	-0.623222	-0.137316	0.15509	-0.481411	0.499946	0.586914
YPL026C	SKS1	-0.3125	-0.346549	-0.264523	-0.511	0.71386	0.720712
YCL040W	GLK1	-0.39083	-0.455459	-0.535298	-0.167292	0.991122	0.557757
YHR198C	AIM18	-0.107546	0.299189	-0.422139	-0.628344	0.372707	0.486134
YER037W	PHM8	0.781034	0.169154	-0.908803	-1.65909	0.821793	0.795914
YMR041C	ARA2	0.110513	0.145164	-0.494287	-0.602204	0.29145	0.549364
YLR201C	COQ9	-0.045947	0.282373	-0.340864	-0.704018	0.307521	0.500935
YLR006C	SSK1	0.166147	-0.183613	-0.273912	-0.802943	0.495199	0.599121
YGR201C	YGR201C	-1.06977	-1.21291	-0.868961	-0.792877	2.26218	1.68233
YJL210W	PEX2	0.179467	0.463231	-0.669868	-0.826147	0.465513	0.387804
YCL057C-A	MOS1	0.045643	0.278656	-0.745214	-0.520671	0.483277	0.458309
YDL022W	GPD1	0.067567	0.056553	-0.575783	-0.974029	0.833088	0.592604
YPR191W	QCR2	0.230002	-0.136138	-0.672592	-0.593243	0.567755	0.604215
YNL259C	ATX1	-0.409393	0.107746	-0.226986	-1.06134	0.720917	0.869053
YBR093C	PHO5	-0.083828	-0.370828	0.141249	-1.11528	0.840899	0.587782
YDL021W	GPM2	0.472086	0.329028	-0.946759	-1.6115	0.952143	0.805004
YDR115W	YDR115W	-0.190431	0.338595	-0.538282	-0.636009	0.551314	0.474814
YLR294C	YLR294C	-0.145405	0.088629	-0.349815	-0.646693	0.274412	0.778872
YBR286W	APE3	-0.173761	-0.049879	-0.207287	-0.755783	0.418517	0.768193
YFR045W	YFR045W	-0.370266	-0.040327	-0.317816	-0.43662	0.55841	0.606619
YJL217W	REE1	-0.939924	-0.939924	-0.939924	-0.939924	1.64062	2.11908
YHR096C	HXT5	-0.027844	-0.958978	-0.284722	-0.926428	1.05	1.14797
YDR072C	IPT1	-0.578256	-0.527092	0.002774	-0.516075	0.688643	0.930006
YLR446W	YLR446W	0.078675	-0.113008	-0.788256	-1.31799	1.02343	1.11715
YPL258C	THI21	0.313316	0.359462	-0.48413	-1.42177	0.461548	0.771572
YOR172W	YRM1	0.085869	0.069536	-0.571249	-0.973004	0.517134	0.871713
YBR092C	PHO3	0.231036	0.190083	-0.328769	-1.37852	0.51466	0.771509
YPR098C	YPR098C	0.106832	0.610009	-1.06151	-0.752125	0.577217	0.519576
YLR109W	AHP1	-0.569764	-0.487947	-0.257604	-0.357553	1.09042	0.582444
YJL100W	LSB6	-0.406813	-0.208664	-0.078728	-1.49804	1.18293	1.00932
Cluster_12	Cluster_12	0	0	0	0	0	0
YLL061W	MMP1	2.29199	2.40489	0.540769	-0.447783	-2.17441	-2.61546
Q0065	AI4	2.3369	2.06375	1.78349	1.13324	-3.65869	-3.65869
YJL222W	VTH2	0.690352	0.747145	2.10201	2.10201	-3.08623	-2.5553
YPL257W	YPL257W	0.592494	0.721481	1.96094	2.00845	-2.64168	-2.64168
YPL279C	YPL279C	0.800234	1.21702	0.838812	1.05693	-3.52889	-0.384109
YHR215W	PHO12	1.24168	1.51022	1.68524	0.287953	-2.62801	-2.09708
YHR216W	IMD2	1.87715	1.91458	2.57332	2.09786	-4.65788	-3.80502
YOR285W	RDL1	1.80674	1.78468	0.526311	0.430992	-2.02757	-2.52115
YER187W	YER187W	1.83108	2.14788	0.302903	0.574045	-2.42795	-2.42795
YLR461W	PAU4	0.717771	1.02695	1.09316	1.40895	-1.88888	-2.35795
Q0120	BI4	2.19529	1.38827	1.64838	0.826028	-3.02898	-3.02898
YCR101C	YCR101C	1.03549	0.782428	0.819255	1.07801	-1.85759	-1.85759
Q0060	AI3	1.66952	0.911609	1.90019	1.19561	-2.21512	-3.4618
YEL073C	YEL073C	1.10047	1.36135	1.48102	1.24531	-2.59407	-2.59407
Cluster_13	Cluster_13	0	0	0	0	0	0
YER049W	TPA1	0.182619	0.062662	0.351739	-0.1254	-0.332602	-0.139019
YLR277C	YSH1	-0.033586	0.124715	0.382808	0.084509	-0.395428	-0.163019
YDR481C	PHO8	0.112122	0.073761	0.382728	-0.088268	-0.170291	-0.310051
YJR147W	HMS2	0.261989	0.294847	0.944325	0.101743	-0.889827	-0.713077
YAL013W	DEP1	0.132969	-0.063567	0.840172	0.017893	-0.112869	-0.814597
YIL153W	RRD1	0.019554	0.164423	0.489482	0.083362	-0.138705	-0.618115
YOL113W	SKM1	0.347444	0.03102	0.310245	-0.143715	-0.294439	-0.250555
YGR068C	ART5	0.390622	0.044451	0.741427	-0.03634	-0.360423	-0.779737
YPL106C	SSE1	0.099278	-0.004276	0.505734	-0.072481	-0.378993	-0.149262
YLL043W	FPS1	0.101017	0.105386	0.466124	-0.09022	-0.239941	-0.342366
YMR316W	DIA1	0.242566	0.017858	0.842324	0.306457	-0.627123	-0.782082
YLR175W	CBF5	0.189938	-0.031049	0.456177	-0.168629	-0.226846	-0.219592
YGL234W	ADE5,7	0.060141	0.066626	0.336365	0.083406	-0.261175	-0.285363
YER119C	AVT6	0.301058	0.283148	0.07318	-0.013051	-0.113868	-0.530468
YDL014W	NOP1	0.202838	0.399612	0.334347	-0.050351	-0.251814	-0.634631
YER076C	YER076C	0.270933	0.369547	0.188085	0.300295	-0.360596	-0.768263
YGR212W	SLI1	0.290125	0.412784	0.915411	0.313067	-1.29779	-0.633594
YGR238C	KEL2	0.160568	-0.070126	0.946001	-0.185475	-0.346551	-0.504417
YIL123W	SIM1	0.458777	0.486549	0.512363	-0.312976	-0.481545	-0.663168
YPL061W	ALD6	0.045525	-0.024099	0.295873	-0.080024	-0.040844	-0.196431
YGR123C	PPT1	0.210056	0.178199	0.240526	-0.133616	-0.337706	-0.15746
YMR276W	DSK2	-0.035894	0.145589	0.555225	0.015824	-0.062356	-0.618389
YFR018C	YFR018C	0.314382	-0.062284	0.339275	-0.05421	-0.01828	-0.518883
YOL013W-A	YOL013W-A	0.477642	0.304953	0.599276	0.515147	-0.713976	-1.18304
YIR030C	DCG1	0.652245	0.113429	0.427789	-0.01089	-0.284558	-0.898016
YDR423C	CAD1	0.083233	0.256436	0.619904	0.043293	-0.500702	-0.502164
YOL140W	ARG8	0.385683	0.059596	0.58308	0.210627	-0.593205	-0.645781
YMR009W	ADI1	0.537952	0.273995	0.634711	-0.170661	-0.179735	-1.09626
YOL151W	GRE2	-0.175985	0.069236	0.229721	0.562136	-0.522428	-0.162682
YBR176W	ECM31	-0.088779	0.064449	0.451129	0.312921	-0.301614	-0.438106
YDR348C	PAL1	0.113546	0.229836	0.419492	-0.214303	-0.420126	-0.128444
YLR346C	YLR346C	0.177187	0.081697	0.338914	0.083099	-0.200967	-0.479931
YKL127W	PGM1	0.119729	0.065305	0.738218	0.328554	-0.701445	-0.550361
YPR017C	DSS4	0.110178	0.308327	0.23577	0.09912	-0.209314	-0.544081
YDL121C	YDL121C	0.117551	0.29504	0.232331	-0.045162	-0.343955	-0.255805
YGL126W	SCS3	0.266699	0.282409	0.290957	-0.150837	-0.08057	-0.608658
YOL015W	IRC10	0.527991	0.302929	0.45456	-0.21322	-0.700779	-0.371481
YER154W	OXA1	0.215006	0.232144	0.768836	-0.407678	-0.373747	-0.434561
YOR202W	HIS3	0.063532	-0.260711	0.565292	0.650376	-0.371754	-0.646735
YHR209W	CRG1	0.142736	0.203989	0.382092	-0.139837	-0.126884	-0.462096
YFR051C	RET2	0.089834	0.162466	0.466124	-0.119036	-0.248935	-0.350453
YMR296C	LCB1	0.070488	0.072166	0.509615	-0.182717	-0.187043	-0.282509
YBL113C	YBL113C	0.62414	-0.599175	0.73339	0.273718	-0.516036	-0.516036
YGR203W	YCH1	0.24717	0.24645	0.33185	0.399077	-0.386079	-0.838468
YER152C	YER152C	0.258861	0.35202	0.232906	-0.192917	-0.075714	-0.575155
YLR234W	TOP3	0.409357	0.253869	0.758201	-0.357437	-0.698492	-0.365499
YMR006C	PLB2	0.191222	0.244123	0.604182	-0.038941	-0.555881	-0.444706
YEL077C	YEL077C	0.529499	0.142685	0.891531	0.081577	-0.822646	-0.822646
YCR084C	TUP1	0.245124	0.072088	0.23084	-0.139078	-0.167009	-0.241965
YFR024C-A	LSB3	0.178861	0.160448	0.161991	-0.062733	-0.155583	-0.282984
YNL268W	LYP1	0.26579	0.255374	0.581436	0.080784	-0.618513	-0.56487
YOR271C	FSF1	0.057867	-0.030178	0.347763	-0.014491	-0.118008	-0.242952
YOL028C	YAP7	0.286585	0.162806	1.02971	-0.310997	-0.641998	-0.526103
YNL290W	RFC3	0.071435	-0.033108	0.402744	-0.085157	-0.159442	-0.196472
YER019W	ISC1	0.396687	0.557051	0.466832	-0.152208	-0.459328	-0.809034
YIL064W	SEE1	0.274724	0.08519	0.260501	-0.152788	-0.253177	-0.21445
YNL300W	TOS6	-0.379072	0.243047	1.04715	0.129519	-0.239829	-0.800819
YCR045W-A	YCR045W-A	0.222015	0.645724	0.380175	-0.191142	-0.409515	-0.647257
YDR488C	PAC11	0.046497	0.028651	0.493226	-0.069678	-0.233657	-0.265039
YBL009W	ALK2	0.065228	-0.078871	0.449379	-0.02802	-0.236412	-0.171305
YFR034C	PHO4	0.625714	0.115876	0.578628	-0.275381	-0.417041	-0.627796
YDR261C	EXG2	0.206233	0.077953	0.217251	-0.128212	-0.201983	-0.171241
YOL110W	SHR5	0.274836	0.849401	0.377501	-0.222385	-0.345494	-0.93386
YCR077C	PAT1	0.401648	0.185267	0.369216	-0.181963	-0.336319	-0.437848
YMR315W-A	YMR315W-A	0.741565	0.354751	0.774194	0.065374	-0.976122	-0.959762
YGL195W	GCN1	0.372551	-0.12833	0.54399	-0.348685	-0.337885	-0.101641
YKL211C	TRP3	0.096962	0.006957	0.271006	-0.030069	-0.162726	-0.182129
YJL118W	YJL118W	0.555057	0.402132	0.146176	0.083007	-0.566171	-0.620201
YPL067C	YPL067C	-0.051378	0.07703	0.699827	0.326518	-0.09302	-0.958978
YOL105C	WSC3	0.127576	0.221759	0.273298	0.020158	-0.406628	-0.236164
YOR315W	SFG1	0.231031	0.078493	0.452785	-0.284376	-0.142425	-0.335507
YMR134W	YMR134W	0.178969	0.187828	0.1214	0.123625	-0.182574	-0.429248
YDR530C	APA2	0.113283	0.152442	0.390835	0.034545	-0.325773	-0.365332
YNL245C	CWC25	0.343365	0.161482	0.69654	-0.230257	-0.219664	-0.751467
YPR031W	NTO1	0.476321	0.421804	0.47853	-0.223717	-0.569219	-0.58372
YKR071C	DRE2	0.140218	-0.04033	0.406701	0.21778	-0.502447	-0.221922
YOL029C	YOL029C	0.538287	0.233936	0.975306	-0.640404	-0.61151	-0.495615
YMR265C	YMR265C	0.264739	0.027303	1.09275	0.016642	-0.742454	-0.65898
YIL159W	BNR1	0.186534	0.104778	0.604171	-0.408143	-0.20894	-0.2784
YGR240C	PFK1	0.215252	0.083696	0.331947	-0.285752	-0.260775	-0.084369
YDR210W	YDR210W	0.323698	0.35782	0.493974	-0.149802	-0.446378	-0.579312
YGL061C	DUO1	0.111071	-0.033769	0.768037	-0.281327	-0.085783	-0.478229
YBL095W	YBL095W	0.63182	-0.06846	0.457404	-0.259991	-0.477336	-0.283438
YCL024W	KCC4	0.191002	-0.091844	0.73011	-0.057524	-0.631894	-0.13985
YKL183W	LOT5	0.047675	0.124715	0.658438	0.274623	-0.581006	-0.524445
YOR027W	STI1	0.35849	-0.165307	0.781099	-0.294313	-0.350629	-0.329341
Cluster_14	Cluster_14	0	0	0	0	0	0
YPL113C	YPL113C	0.517519	0.929793	-0.061287	0.030361	-0.973659	-0.442727
YKR037C	SPC34	0.322421	0.41606	-0.033371	-0.022831	-0.430455	-0.251824
YMR153C-A	YMR153C-A	0.825697	0.701918	0.023385	-0.882916	-0.155024	-0.51306
YLL062C	MHT1	1.40365	1.52939	-0.005602	-0.645814	-1.06112	-1.22051
YIL047C	SYG1	0.701992	0.620149	-0.008251	-0.596311	-0.478524	-0.239054
YJL092W	SRS2	0.308893	0.385359	0.461236	-0.296494	-0.512274	-0.346721
YNL111C	CYB5	0.636955	0.622907	-0.018393	-0.33208	-0.358186	-0.551203
YDR232W	HEM1	0.637628	0.516105	0.222586	-0.520547	-0.337848	-0.517925
YML125C	PGA3	0.332712	0.308687	0.087265	-0.49767	-0.196804	-0.034188
YDR476C	YDR476C	0.323691	0.359965	0.274999	-0.360858	-0.200309	-0.397489
YKL182W	FAS1	0.395991	0.131476	0.325964	-0.66439	-0.202291	0.01325
YKL191W	DPH2	0.385503	0.459663	0.280129	-0.46787	-0.346229	-0.311196
YPL273W	SAM4	0.26676	0.401401	0.039426	-0.20506	-0.360307	-0.142221
YPL134C	ODC1	0.611484	0.708958	-0.430994	-0.203487	-0.173089	-0.512873
YHR071W	PCL5	1.02243	0.637109	1.00598	0.447267	-1.7118	-1.40099
YBR182C	SMP1	0.796698	0.807848	-0.132605	-0.430903	-0.285985	-0.755053
YDR119W-A	COX26	-0.003763	0.872458	-0.217174	-0.217174	-0.217174	-0.217174
YNL148C	ALF1	0.538425	0.600658	0.307779	-0.394988	-0.673184	-0.378691
YHR025W	THR1	0.328178	0.399304	0.265679	-0.369401	-0.215728	-0.408032
YML059C	NTE1	0.434254	0.353376	0.284648	-0.26192	-0.510902	-0.299455
YLL024C	SSA2	0.444277	0.356142	0.140524	-0.504142	-0.337877	-0.098925
YFR026C	ULI1	1.73606	1.76039	0.077089	-0.886545	-1.3435	-1.3435
YBL032W	HEK2	0.434731	0.208205	0.231122	-0.342601	-0.028366	-0.503091
YBR177C	EHT1	1.06157	0.60809	0.196276	-0.351582	-0.887842	-0.626516
YGR031W	IMO32	0.326965	0.261349	0.115035	-0.329276	-0.167025	-0.207048
YDR525W-A	SNA2	0.929792	1.15201	-0.18591	-0.180438	-0.774474	-0.940979
YEL048C	TCA17	0.916697	0.997277	-0.249032	-0.698093	-0.306629	-0.660219
YCR047C	BUD23	0.232777	0.282534	0.264913	-0.258383	-0.291316	-0.230525
YHR199C	AIM46	0.631528	0.630734	-0.142361	-0.224158	-0.196572	-0.699171
YNL277W	MET2	0.410689	0.271681	0.144459	-0.541554	-0.180127	-0.105148
YGR239C	PEX21	0.25365	0.682412	-0.052137	0.291154	-0.937968	-0.23711
YOR373W	NUD1	0.305714	0.232561	0.305914	-0.42048	-0.213789	-0.20992
YKR080W	MTD1	0.245495	0.26882	0.172063	-0.304351	-0.317014	-0.065013
YNL007C	SIS1	0.309569	0.476684	0.222899	-0.20276	-0.35565	-0.450742
YLR378C	SEC61	0.289639	0.545858	0.284263	-0.536685	-0.272792	-0.310282
YNL012W	SPO1	0.928887	0.859555	0.059032	-0.725278	-0.471318	-0.650878
YOR248W	YOR248W	0.34533	1.02891	0.027052	-0.565326	-0.64989	-0.186072
YDR313C	PIB1	0.402539	0.27876	0.039462	-0.479388	-0.158313	-0.08306
YNR075W	COS10	0.643078	0.462309	-0.02208	-0.41998	-0.378615	-0.284711
YNL219C	ALG9	0.197025	0.308523	0.026403	-0.223844	-0.21759	-0.090516
YGR065C	VHT1	0.866339	0.80288	0.18684	-0.246447	-0.894121	-0.71549
YEL034W	HYP2	0.657083	0.577014	-0.132818	-0.104973	-0.453111	-0.543196
YGR177C	ATF2	0.800999	0.872391	-0.074949	-0.548419	-0.719163	-0.330858
YBR031W	RPL4A	0.358443	0.4878	0.16265	-0.4539	-0.294279	-0.260714
YMR205C	PFK2	0.371281	0.31851	0.172484	-0.462109	-0.263145	-0.137022
YDR205W	MSC2	0.580154	0.825375	-0.09418	-0.454677	-0.580385	-0.276286
YDR340W	YDR340W	0.277708	1.15393	0.071458	0.071458	0.071458	-1.64601
YPL189W	GUP2	0.693384	0.604581	-0.017404	-0.60907	-0.547754	-0.123737
YLR233C	EST1	0.460082	0.34695	0.430169	-0.490732	-0.420334	-0.326134
YOR385W	YOR385W	0.204495	0.926545	-0.284556	-0.025797	-0.62672	-0.193968
YIL014C-A	YIL014C-A	1.36909	0.919912	-0.302824	-0.496578	-0.343057	-1.14654
YDR268W	MSW1	0.323802	0.176753	0.188603	-0.112625	-0.403148	-0.173385
YJL121C	RPE1	0.522181	0.584815	-0.042309	-0.390716	-0.123028	-0.550943
YHL008C	YHL008C	1.17044	1.11377	0.39571	-0.465113	-0.769643	-1.44516
YER034W	YER034W	0.474938	0.375006	0.398633	-0.385678	-0.301642	-0.561256
YLL012W	YEH1	1.16232	0.964545	-0.264478	-0.592939	-0.555362	-0.714089
YPR156C	TPO3	0.52541	0.711316	0.284251	-0.368215	-0.751062	-0.4017
YKL221W	MCH2	1.78178	1.27949	0.14639	-0.746854	-1.78835	-0.672455
YBR293W	VBA2	1.2828	1.6057	0.772164	-0.153817	-2.08166	-1.42519
YHR146W	CRP1	0.625227	0.273695	0.333828	-0.556679	-0.385583	-0.290489
YAL049C	AIM2	0.70951	0.745772	-0.088669	-0.778071	-0.014638	-0.573904
YPL128C	TBF1	0.261608	0.365414	0.146048	-0.445732	-0.345048	0.01771
YBR218C	PYC2	0.528297	0.246524	0.233945	-0.30057	-0.438768	-0.269429
YOR301W	RAX1	0.348238	0.2407	0.372429	-0.300986	-0.401375	-0.259007
YHR049W	FSH1	0.645777	0.907343	-0.09546	-0.451878	-0.545841	-0.459941
YNL087W	TCB2	0.688023	0.611443	0.120342	-0.490503	-0.466035	-0.463269
YEL057C	YEL057C	0.576045	0.867303	0.248778	-0.769998	-0.22653	-0.695598
YMR243C	ZRC1	0.541836	0.73361	-0.023302	-0.624764	-0.456279	-0.171102
YOR221C	MCT1	0.23314	0.405754	0.007558	-0.427944	-0.174819	-0.043689
YPL250C	ICY2	0.341491	0.429216	0.240408	-0.619153	-0.191163	-0.200799
YCR098C	GIT1	0.495424	0.56429	0.890624	0.244539	-0.959228	-1.23565
YIR027C	DAL1	0.999541	0.757117	0.582199	0.196438	-0.533114	-2.00218
YDR531W	CAB1	0.322497	0.555682	0.308815	-0.364682	-0.658662	-0.163649
YNR043W	MVD1	0.537708	0.278795	0.01095	-0.33186	-0.18511	-0.310482
YMR182C	RGM1	1.37451	1.63776	0.417194	0.260915	-1.61065	-2.07972
YOR180C	DCI1	0.913608	0.586296	0.109243	-0.223914	-1.03408	-0.351148
YBR101C	FES1	0.364839	0.174509	0.27701	-0.301923	-0.229388	-0.285047
YMR306W	FKS3	0.591664	0.690277	0.101296	-0.664524	-0.229116	-0.489597
YMR266W	RSN1	0.690232	0.653916	0.436408	-0.208963	-0.892175	-0.679419
YOR154W	SLP1	0.317359	0.657527	-0.042613	-0.527515	-0.456116	0.051358
YPL211W	NIP7	0.326722	0.345142	0.023114	-0.283191	-0.229109	-0.182678
YPR052C	NHP6A	0.638297	0.733899	-0.290348	-0.51534	-0.034804	-0.531705
YBL082C	ALG3	0.335306	0.48934	0.221492	-0.578959	-0.341738	-0.125441
YNR013C	PHO91	0.319263	0.192016	0.292428	-0.436317	-0.21368	-0.15371
YBL071W-A	KTI11	0.457272	0.610011	-0.221432	-0.272741	-0.607968	0.034858
YJR116W	TDA4	1.02937	1.06452	-0.049264	-0.582214	-0.753958	-0.708452
YMR202W	ERG2	0.617551	0.888544	-0.277075	-0.560305	-0.439063	-0.229651
YPR153W	YPR153W	0.660971	0.656491	-0.324604	-0.440241	-0.744771	0.192154
YDR497C	ITR1	0.388649	0.427348	0.168336	-0.401452	-0.288867	-0.294014
YNL141W	AAH1	0.332088	0.362386	0.07521	-0.494954	-0.247152	-0.027578
YJR010C-A	SPC1	0.703799	0.710081	-0.187487	-0.463273	-0.258222	-0.504897
YJR148W	BAT2	0.189002	0.40169	0.110145	-0.321284	-0.137812	-0.24174
YHR177W	YHR177W	0.737025	0.712782	0.631214	0.101476	-1.0419	-1.1406
YKL144C	RPC25	0.582063	0.590624	-0.121701	-0.520551	-0.426391	-0.104045
YHR031C	RRM3	0.462342	0.35336	0.064983	-0.380803	-0.363404	-0.136478
YGR234W	YHB1	1.57839	0.298603	0.578314	0.633235	-1.10533	-1.98321
YPL155C	KIP2	0.399189	0.324486	0.070673	-0.356004	-0.194215	-0.244129
YBL030C	PET9	0.692953	0.671535	0.021038	-0.200337	-0.549954	-0.635235
YIR035C	YIR035C	0.33248	0.793664	-0.43897	-0.109823	-0.136671	-0.440679
YGR230W	BNS1	0.652892	0.955378	0.440408	-0.853374	-0.757366	-0.437937
YPL222W	FMP40	0.420378	0.367682	0.192356	-0.318354	-0.32378	-0.338282
YLR228C	ECM22	0.416347	0.414314	0.171517	-0.47259	-0.40282	-0.126768
YCR018C	SRD1	1.30656	1.18278	-0.757672	-0.106596	-0.370484	-1.25459
YHR149C	SKG6	0.369329	0.208503	0.281022	-0.277098	-0.335411	-0.246346
YEL033W	MTC7	0.706379	0.568417	-0.076316	-0.264555	-0.4276	-0.506324
YKL084W	HOT13	0.236736	0.241471	0.148787	-0.141016	-0.291445	-0.194533
YCL039W	GID7	0.364446	0.290999	0.141317	-0.383501	-0.098768	-0.314494
YLR112W	YLR112W	1.86913	0.838461	-0.294637	-0.128989	-0.907449	-1.37652
YHR128W	FUR1	0.672152	0.926595	-0.183543	-0.657012	-0.420766	-0.337426
YDR247W	VHS1	0.239517	0.622091	0.062367	-0.483324	-0.308244	-0.132407
YNL036W	NCE103	0.847283	1.18078	-0.267083	-0.724022	-0.549422	-0.487538
YOL014W	YOL014W	0.593649	0.555706	0.739318	0.276708	-1.23786	-0.927524
YGL022W	STT3	0.239361	0.184494	0.34274	-0.33736	-0.231498	-0.197737
YCL064C	CHA1	0.459512	0.453303	0.307604	-0.632806	-0.541163	-0.04645
YFR055W	IRC7	1.64076	1.4477	-0.246168	-0.617226	-0.964134	-1.26093
YHR145C	YHR145C	1.25483	1.37206	1.12349	-0.617754	-0.589279	-2.54335
YIL011W	TIR3	0.418944	0.577399	0.314867	-0.742136	-0.300939	-0.268135
YGR175C	ERG1	0.840073	0.548532	-0.453648	-0.284035	-0.242975	-0.407947
YLR154C	RNH203	0.394076	0.537777	-0.00298	-0.266174	-0.372521	-0.290178
YER018C	SPC25	0.535322	0.955478	0.13689	-0.510778	-0.031441	-1.08547
YDR142C	PEX7	0.392465	0.250764	0.117666	-0.349314	-0.158863	-0.252719
YDL037C	BSC1	1.34811	0.432918	0.599379	0.530563	-1.42847	-1.4825
YMR119W-A	YMR119W-A	0.548753	0.696276	0.134334	-0.722385	-0.593955	-0.063023
YKL043W	PHD1	0.941035	0.554222	-0.165739	-0.590766	-0.269691	-0.469061
YOL059W	GPD2	0.249285	0.423662	0.223884	-0.65308	-0.181579	-0.062174
YDL036C	PUS9	0.419824	0.223775	0.400698	-0.36061	-0.354408	-0.329279
YPR009W	SUT2	0.675034	0.638453	0.08608	-0.540991	-0.449623	-0.408952
YNR016C	ACC1	0.475432	0.128085	0.382474	-0.515703	-0.334119	-0.13617
YNR019W	ARE2	0.772851	0.981104	-0.005862	-0.2579	-0.700357	-0.789836
YBR094W	PBY1	0.387598	0.148791	0.271897	-0.374708	-0.355662	-0.077916
YPR158W	CUR1	0.257931	0.348092	0.421444	-0.266686	-0.503312	-0.25747
YLR058C	SHM2	0.255827	0.269818	0.112794	-0.36813	-0.251836	-0.018473
YLR153C	ACS2	0.464428	0.289486	0.04276	-0.322076	-0.261611	-0.212986
YMR307W	GAS1	0.342935	0.480597	0.109377	-0.441998	-0.308967	-0.181944
YHR072W	ERG7	0.725932	0.61697	-0.100599	-0.306347	-0.471157	-0.464799
YOR087W	YVC1	0.193426	0.340349	0.095246	-0.138201	-0.423049	-0.06777
YNL322C	KRE1	0.331327	0.405854	0.217587	-0.501653	-0.109656	-0.34346
YNR017W	TIM23	0.320122	0.413084	0.082853	-0.37564	-0.179256	-0.261162
YFL062W	COS4	0.81343	0.661454	0.706692	0.607964	-1.68853	-1.10101
YIL023C	YKE4	0.279918	0.337586	0.018074	-0.306887	-0.274801	-0.05389
YGR049W	SCM4	0.881348	1.01869	-0.244285	-0.536906	-0.596387	-0.522464
YBR162C	TOS1	0.688849	1.03049	0.080656	-0.449027	-0.684508	-0.666463
YPR181C	SEC23	0.287821	0.270972	0.2	-0.40096	-0.219698	-0.138135
YHR032W	ERC1	0.662008	0.648522	-0.198642	-0.432713	-0.454364	-0.224812
YDL086W	YDL086W	0.680324	0.764944	-0.616082	-0.22804	-0.208994	-0.392153
YKL032C	IXR1	0.3997	0.26045	0.203101	-0.396785	-0.219836	-0.246629
YDL138W	RGT2	0.326014	0.724913	0.138558	-0.578679	-0.503598	-0.107208
YER011W	TIR1	0.218223	0.358586	0.481587	-0.655197	-0.095708	-0.307491
YPL231W	FAS2	0.423505	0.010293	0.444602	-0.385814	-0.263286	-0.2293
YDR533C	HSP31	0.80461	1.06214	-0.514195	0.26482	-0.71197	-0.905403
YJR004C	SAG1	0.321873	0.601449	0.253757	-0.687928	-0.472266	-0.016884
